# Supplementary material for: Cancer cells exhibit clonal diversity in phenotypic plasticity
Source: Open Biol. 2017 Feb 15;7(2):160283. doi: 10.1098/rsob.160283 (PMC5356442; doi:10.1098/rsob.160283)
Supplement: Normalized reads for each clone [file rsob160283supp4.csv]

% Each column is a different sorted fraction; 'E' = epithelial, 'M' = mesenchymal, 'X1_2' time point 1 replicate 2. Each sort is normalized so that each column (all clones) sum up to the fractional size of that population in the unsorted cells.
barcode	E1_1	E1_2	M1_1	M1_2	E2_1	E2_2	M2_1	M2_2	E3_1	E3_2	M3_1	M3_2
CAACACTTCTGGCC	4.42E-06	8.32E-06	0.000138531	0.000201001	3.08E-06	6.88E-06	0.000123492	0.000200087	8.37E-06	6.04E-06	6.83E-05	7.03E-05
AAGTGTGGCCAGGG	0.002685987	0.002457598	0.00194676	0.001020116	0.00346717	0.003026927	0.001799908	0.00166968	0.00422191	0.004282831	0.002036142	0.002634828
GCGGTAAGCCCTAG	2.34E-05	5.14E-06	3.67E-05	2.19E-05	3.78E-06	9.23E-06	6.20E-06	1.02E-05	8.55E-06	8.16E-06	2.54E-06	5.40E-06
TGCTTGGTTTGAAG	1.06E-06	2.12E-06	4.38E-05	2.68E-05	9.02E-08	2.31E-06	1.24E-05	2.65E-05	4.80E-07	1.59E-06	2.74E-06	5.07E-06
ATTTTAGGGCTGGG	0.003039233	0.002672519	0.000222067	7.09E-05	0.002318464	0.002483405	9.90E-05	0.000118323	0.001569416	0.001562988	0.000133688	0.000123991
ATTCTCCTCATTGA	0.000152889	0.000159374	6.46E-05	7.24E-05	9.10E-05	9.55E-05	7.08E-05	4.15E-05	6.96E-05	4.54E-05	5.01E-05	4.89E-05
AAAGTATGAGTCGT	2.15E-05	2.18E-05	0.000153304	0.000108273	7.58E-06	6.86E-06	7.15E-05	9.81E-05	3.16E-06	6.09E-06	2.91E-05	3.92E-05
GTCTTAGGGGGGCG	4.20E-07	2.16E-06	2.75E-05	4.17E-05	1.29E-07	1.03E-06	1.86E-05	3.87E-06	4.95E-06	8.57E-07	1.15E-05	9.23E-06
GGTTGGATATGTAT	1.51E-05	1.86E-05	9.00E-05	5.94E-05	6.33E-06	8.00E-06	1.78E-05	4.96E-05	1.16E-05	2.75E-06	1.35E-05	1.12E-05
CCATTATTTTAAGT	2.74E-05	2.45E-05	0.000337743	0.000292298	3.32E-05	1.89E-05	0.000167496	0.000200149	6.91E-06	4.57E-06	0.000119422	0.000112648
CGCTTTAGACGGAT	2.07E-05	3.08E-05	2.73E-05	1.21E-05	1.81E-05	2.03E-05	1.17E-05	9.84E-06	1.45E-05	1.73E-06	2.10E-07	1.90E-06
TTCTGAGGGATCTG	5.41E-05	4.46E-05	0.001129857	0.000750675	8.14E-06	2.15E-05	0.000596892	0.000708854	3.67E-05	2.89E-05	0.000382354	0.000451256
AGGCCGATCTGAGG	5.67E-05	3.52E-05	0.000942977	0.000670357	5.38E-06	8.84E-06	0.000566002	0.000655363	4.71E-05	2.29E-05	0.000404836	0.000375424
TTATTGGTATTTGT	0.000301432	0.000286531	1.09E-06	0.000135673	0.000224937	0.000219765	0.000183293	0.000188129	0.000127756	0.000140736	0.000148033	0.000129808
AGTCAGCTGTCGAC	1.87E-05	2.22E-05	3.69E-05	4.36E-05	1.89E-05	6.19E-06	2.62E-05	1.91E-05	5.02E-06	7.71E-07	7.50E-06	9.06E-06
GCAGGTGCGGGGGG	1.06E-06	0.000322751	0.001824891	0.003045322	0.00020151	9.64E-05	0.004223243	0.000969161	0.000283639	0.000263575	0.002947585	0.003590466
ATAGCTAAATATCA	1.52E-05	4.22E-05	0.000230691	0.000424141	1.32E-05	1.30E-05	0.000297755	0.000258012	1.43E-05	2.21E-05	0.000235546	0.000207717
GTTGTCAGGAGATT	6.67E-05	7.97E-05	9.17E-06	2.26E-06	2.69E-05	2.62E-05	4.23E-06	3.17E-06	6.10E-06	6.04E-06	5.62E-07	2.64E-07
GGTGGGGGTGGAGT	0.001358014	0.001099727	0.00225448	0.00185387	0.001061374	0.001118482	0.002352892	0.002651118	0.001581379	0.00122566	0.002417174	0.002381872
TCTCGTTAGTATAA	0.000273771	0.000262472	0.000450264	0.0005499	0.000197508	0.000206869	0.000332558	0.000360395	0.000125551	0.000192839	0.00028185	0.000287999
TCGTATTCGCGCAT	0.000107013	3.95E-05	0.001088414	0.000983014	2.56E-05	1.78E-05	0.000828672	0.000925653	8.90E-05	7.21E-05	0.000769442	0.000741095
GCGGTGTTACTTGT	1.49E-05	1.13E-05	1.09E-06	3.78E-05	6.40E-06	1.27E-05	1.96E-05	5.88E-06	4.66E-06	8.79E-06	3.43E-06	6.32E-06
TTGAGTTTGTAGTT	0.000452899	0.000489237	7.20E-06	1.08E-06	0.000312873	0.000384055	1.24E-05	1.08E-05	0.00027651	0.000255923	2.79E-05	1.55E-05
TGTAACTGGTCTCT	3.32E-05	2.55E-05	0.000166716	0.000158699	1.12E-05	6.73E-06	6.06E-05	8.51E-05	7.04E-06	3.84E-06	2.26E-05	1.67E-05
TCCGAGGCGGCCCG	0.00091457	0.001049181	0.000838444	0.000538847	0.000756836	0.000775135	0.000895361	0.000676427	0.001009842	0.000987146	0.000725671	0.000814258
AAGGTTGGTCAAGG	1.06E-06	4.65E-07	1.48E-05	1.63E-05	3.94E-07	3.94E-07	3.56E-06	6.78E-06	2.33E-06	5.34E-07	1.65E-06	2.95E-06
GAGTACGGCGGTAC	0.000187152	0.000244024	7.83E-05	9.26E-05	6.43E-05	8.06E-05	3.60E-05	3.95E-05	3.67E-05	2.66E-05	8.43E-06	1.22E-05
CGGCATAGTATACG	0.000153824	0.000188775	3.97E-05	4.37E-05	0.000104509	0.000109072	3.64E-05	1.20E-05	5.01E-05	4.66E-05	2.75E-05	3.58E-05
AGTAGTCCGTATCT	1.06E-06	1.07E-06	1.28E-05	2.42E-05	5.04E-07	5.04E-07	3.39E-06	1.93E-06	5.17E-07	5.16E-07	3.23E-06	2.45E-06
TGTTTATATTGTGG	0.000800121	0.000767112	0.000187876	0.000116604	0.000920803	0.000913618	0.000100637	0.000162273	0.00070933	0.000621446	0.000162037	0.000153569
GGGCCCGGTGGGCG	0.000186542	1.07E-06	0.000165206	0.000127633	1.03E-06	1.03E-06	9.37E-05	7.35E-05	8.25E-05	1.02E-06	5.07E-05	5.52E-05
GCAACGGACGCGAC	0.001496049	0.001478998	0.000374613	0.000505564	0.001351836	0.001307328	0.000539281	0.000658423	0.001552318	0.001567963	0.000770433	0.000766357
TGTCAGGCACCAGT	1.56E-06	1.07E-06	3.10E-05	3.96E-05	1.70E-06	2.77E-06	1.48E-05	2.81E-05	2.93E-07	2.78E-06	6.45E-06	1.21E-05
TGTCGGGATGGGGA	0.000173618	0.000107142	0.001080043	0.001328408	4.44E-05	2.15E-05	0.001154601	0.001520215	0.000107172	0.000127986	0.001002041	0.001042714
AAACAAACGGGATG	5.40E-07	5.70E-06	1.80E-05	1.71E-05	5.21E-08	5.23E-08	1.56E-05	1.03E-05	5.66E-07	3.37E-06	1.63E-06	1.18E-06
TGCGGGCTGGGTGG	0.000212913	0.000233709	3.31E-05	1.10E-05	0.000210607	0.000169799	2.13E-05	8.52E-06	8.91E-05	7.93E-05	2.03E-05	2.84E-05
AGAAGACTTTTACT	3.00E-06	1.41E-05	2.13E-05	3.30E-05	5.15E-06	1.03E-06	3.44E-05	2.26E-05	3.12E-06	1.02E-06	1.75E-05	2.54E-05
GTTGGATACTGGGT	2.65E-05	2.17E-05	0.000707821	0.000484462	5.00E-06	5.81E-06	0.000423215	0.000432874	2.66E-05	2.80E-05	0.000297483	0.000300264
GAGTCAAGCACGTG	0.000125345	0.000120705	0.000922583	0.0006377	8.58E-05	8.09E-05	0.000623244	0.000671102	9.33E-05	9.75E-05	0.000529058	0.000520201
CCCCTATTCGACTA	1.06E-06	1.07E-06	2.07E-05	2.33E-05	1.95E-07	1.95E-07	1.07E-05	8.73E-06	4.77E-07	4.76E-07	4.32E-06	3.68E-06
AAGACCTGGATTCT	6.18E-05	4.20E-05	5.71E-05	4.90E-05	2.33E-05	2.33E-05	4.70E-05	5.73E-05	2.50E-05	1.64E-05	3.76E-05	4.13E-05
GGCACGGAGAGTAA	1.06E-06	7.42E-07	6.74E-06	1.57E-05	3.78E-07	3.78E-07	6.54E-06	4.52E-06	2.47E-06	5.11E-07	3.69E-06	2.24E-06
TCCTCTCCGGGGGC	0.000489051	0.000437713	3.67E-06	3.27E-07	0.000200785	0.000167941	1.32E-05	2.71E-05	0.000174301	0.000150622	2.07E-05	2.44E-05
GTAGGGGAAGGGCG	1.21E-05	1.19E-05	1.25E-05	1.68E-05	1.04E-05	1.02E-05	5.25E-06	7.17E-06	1.65E-07	3.89E-06	5.84E-06	3.11E-06
GTCGGCTCGGAGGG	0.000299958	0.000375741	3.51E-05	3.06E-05	0.000273233	0.000270551	4.28E-05	2.83E-05	0.000197685	0.000184675	2.56E-05	4.40E-05
CCGGTGCACATATT	5.98E-05	4.39E-05	0.000257091	0.000394398	3.94E-05	3.86E-05	0.00032249	0.00026896	4.55E-05	4.47E-05	0.000274172	0.00024619
GGTGTGGGATAGGC	6.30E-05	8.54E-05	1.82E-05	1.81E-05	6.30E-05	8.20E-05	1.29E-05	1.26E-05	6.10E-05	5.16E-05	1.32E-05	2.08E-05
GAGAGCAGGGTGGG	0.000289721	0.000200951	2.85E-05	1.10E-06	0.000161844	0.00014882	1.35E-05	1.01E-05	0.000109405	0.000100402	8.90E-06	1.08E-05
CCGTTCAGGCCTGG	3.89E-07	2.62E-06	1.94E-05	2.81E-05	1.20E-08	1.21E-08	1.52E-05	1.26E-05	3.44E-07	3.42E-07	1.32E-05	2.45E-06
GGCTTTGGAGCGAG	2.74E-06	2.21E-06	0.000110605	7.99E-05	5.89E-06	1.03E-06	4.99E-05	6.82E-05	5.86E-06	3.37E-08	2.42E-05	3.70E-05
GGCTGTATTTTCAG	1.49E-06	2.17E-06	8.52E-05	3.98E-05	1.61E-06	4.95E-06	4.25E-05	3.00E-05	1.02E-06	1.02E-06	2.24E-05	3.18E-05
GGACTTATTTGGAT	0.000559659	0.000395368	0.001242041	0.001024715	0.000382718	0.000368132	0.000822212	0.000990033	0.000383753	0.000392846	0.000689577	0.000764821
AGAGTGTGACATTC	3.83E-05	3.93E-05	1.09E-06	1.10E-06	2.78E-05	2.01E-05	1.04E-06	1.30E-05	4.98E-06	8.88E-06	2.41E-07	2.42E-07
TCATCCGGGGGTCG	8.12E-06	8.85E-07	5.49E-05	3.99E-05	1.03E-06	2.71E-06	3.46E-05	5.56E-05	2.56E-06	1.02E-06	2.34E-05	2.35E-05
CATGATTGTTAAAT	3.60E-05	5.56E-05	9.46E-05	8.75E-05	7.57E-06	1.79E-05	3.88E-05	5.76E-05	8.28E-06	9.93E-06	1.08E-05	1.28E-05
GGGTCTTGGGCCAA	2.46E-05	4.58E-05	2.05E-05	2.84E-05	5.92E-06	1.00E-05	1.41E-05	1.60E-05	9.69E-06	2.69E-06	8.02E-06	8.80E-06
GTTGTCGATGCTGG	1.67E-06	1.70E-05	8.38E-05	5.72E-05	8.01E-07	1.10E-06	2.78E-05	2.16E-05	3.88E-06	2.53E-06	1.36E-05	3.60E-06
AATTTTTCAATGGG	1.41E-07	6.06E-06	1.18E-05	4.93E-06	1.45E-06	3.03E-06	4.78E-06	6.09E-06	1.12E-06	1.52E-06	4.54E-06	5.24E-06
TCAAATTATATTGC	0.00010895	8.40E-05	6.36E-05	0.000106165	4.50E-05	5.57E-05	5.07E-05	4.78E-05	2.33E-05	2.03E-05	2.55E-05	3.42E-05
ATCTACACTGATAG	0.000352037	0.000298555	0.00023571	0.000161761	0.000360388	0.000298782	0.000173206	0.0002047	0.000236213	0.000323604	0.000152223	0.000188364
CTCTTTCTAAATAG	9.78E-06	5.06E-06	3.49E-05	4.46E-05	2.11E-06	2.50E-06	1.22E-05	3.17E-06	4.29E-06	3.99E-07	6.55E-06	5.74E-06
ATATTGTTGTGTGT	2.96E-05	5.42E-05	5.72E-06	1.10E-06	2.26E-05	1.52E-05	2.63E-07	1.04E-06	1.38E-05	1.12E-05	1.23E-06	9.39E-08
CTTCATTTGTCCAA	0.000263486	0.000422872	4.06E-05	6.24E-05	0.000326661	0.000208298	3.87E-05	1.68E-05	0.000101721	0.000124746	3.31E-05	2.97E-05
ACGCGTGTTGTCGA	6.44E-06	6.54E-07	1.25E-05	1.59E-05	1.36E-07	1.36E-07	1.34E-05	8.73E-06	4.25E-07	4.23E-07	4.68E-06	6.31E-06
TCTTTCTTGGCTCC	7.41E-06	1.00E-05	7.55E-07	3.62E-06	1.93E-05	2.27E-05	4.46E-06	8.75E-08	6.19E-06	3.41E-06	2.40E-06	2.33E-06
GCAGACCCCTCGTA	1.26E-05	1.89E-05	7.74E-06	5.62E-06	1.49E-05	7.30E-06	2.28E-05	1.20E-05	7.82E-06	1.64E-05	1.64E-05	1.46E-05
GCAATGAATAATAA	7.41E-05	3.58E-05	0.000515693	0.000618802	3.97E-05	6.61E-06	0.000460319	0.000457943	2.42E-05	3.79E-05	0.000303761	0.000304909
GTTTTAACATGGGG	0.000269685	0.000172993	0.001670132	0.000828002	9.76E-05	0.00011589	0.001125263	0.00121476	0.000219253	0.000234053	0.001054544	0.001253917
TTCGGCTGTGCATG	8.91E-06	1.29E-05	6.73E-05	5.45E-05	5.86E-06	5.86E-06	2.53E-05	2.05E-05	4.86E-06	3.51E-06	1.67E-05	2.77E-05
GGGAGTTCGAAAAG	1.42E-06	2.53E-06	4.99E-05	2.50E-05	1.54E-07	3.18E-07	2.45E-05	1.58E-05	1.62E-06	2.80E-06	4.15E-06	4.33E-06
GTGCGGCCCGGGAT	5.92E-06	7.99E-06	5.32E-05	3.61E-05	3.17E-06	1.03E-06	3.53E-05	3.49E-05	8.97E-06	4.88E-07	1.80E-05	2.15E-05
CTCTAGGATCAGAG	0.000405207	0.000362055	0.000197847	0.00021993	0.000314961	0.000300733	0.000264532	0.000194871	0.000344469	0.000307436	0.00024353	0.000241424
GGATTTAGGACTAC	7.06E-05	5.03E-05	0.000643096	0.000774892	3.02E-05	1.31E-05	0.000630329	0.000666266	5.64E-05	4.01E-05	0.000493256	0.000476638
CTGCGACCGGGGGG	2.29E-07	3.15E-06	1.04E-05	3.48E-05	8.94E-08	8.48E-07	2.35E-05	2.56E-06	3.26E-07	3.25E-07	9.13E-06	7.55E-06
TACAAATGGAGATG	0.000146088	5.03E-05	0.003302775	0.00193001	5.88E-05	6.11E-05	0.002314053	0.002722189	0.000223694	0.000193928	0.002459484	0.002538036
GGGTTCTTTTTGGG	9.95E-06	1.32E-06	0.000400896	0.000235864	5.39E-06	4.07E-07	0.000242161	0.000242785	6.99E-06	2.16E-05	0.000187756	0.000196592
GAGGAGCCGAAGTT	0.00012905	0.000125932	1.09E-06	5.03E-06	8.82E-05	0.000108708	4.10E-06	1.59E-06	4.85E-05	2.77E-05	6.77E-07	2.86E-06
TATCCTAAGATCCT	4.43E-06	1.07E-06	0.00022113	0.000201246	5.68E-06	2.32E-06	9.97E-05	0.000118263	1.39E-05	6.71E-06	7.98E-05	6.77E-05
TCGTTCCTAATAAA	1.65E-05	2.42E-05	0.000181866	0.000193615	4.62E-06	6.92E-06	0.000134842	9.72E-05	9.21E-06	7.62E-06	9.70E-05	0.000104326
TGACAAATGACCAC	4.98E-05	6.28E-05	0.000524987	0.000653592	2.23E-05	1.03E-06	0.000420274	0.000527602	2.86E-05	1.27E-05	0.000251932	0.00029009
AACGTTAAATACTT	2.17E-06	1.07E-06	3.10E-05	2.03E-05	1.92E-06	8.87E-08	1.30E-05	1.13E-05	1.52E-07	1.50E-07	1.18E-05	1.49E-05
GTCCGTGTCAACGA	3.28E-07	2.06E-06	1.08E-05	8.71E-06	1.03E-06	2.55E-06	1.36E-05	2.42E-05	2.35E-07	2.34E-07	9.98E-06	1.19E-05
CGACTCGAGTTGGT	0.000413387	0.00045613	0.00014044	0.0001105	0.000316944	0.000354844	0.00014238	0.000130129	0.00028639	0.000270176	0.000125818	0.000126542
GGCGAAAGAAGGCG	1.06E-06	1.29E-06	3.31E-05	2.83E-05	1.84E-06	2.93E-06	2.29E-05	1.77E-05	4.72E-06	1.83E-07	1.16E-05	1.31E-05
CATATGAAGTGGTA	5.35E-07	2.67E-06	1.46E-05	2.08E-05	3.11E-07	1.65E-06	7.03E-06	7.09E-06	5.06E-07	3.16E-07	1.07E-05	6.49E-06
TCGTGGCACTACGC	9.22E-06	1.12E-05	1.41E-05	1.54E-05	1.12E-07	8.87E-06	1.70E-05	6.02E-06	3.30E-08	1.09E-06	1.05E-05	6.13E-06
GCCGGTTGCTCCCG	2.32E-05	5.04E-05	9.51E-05	0.00020077	1.61E-05	2.72E-05	0.000116591	4.56E-05	1.32E-05	1.36E-05	4.25E-05	4.97E-05
GGGGCTAGCGAGAA	1.06E-06	1.50E-05	4.02E-06	4.82E-05	1.83E-06	1.47E-06	3.15E-05	9.09E-07	1.43E-06	6.24E-09	1.38E-05	2.42E-05
TAGTGATGTCTTTC	8.68E-05	5.63E-05	4.78E-06	5.37E-06	3.42E-05	1.78E-05	2.54E-06	1.04E-06	2.88E-06	1.49E-05	3.67E-07	1.90E-07
ACTTTCTACAACAG	4.39E-06	4.18E-06	2.46E-05	1.60E-05	1.99E-07	7.78E-07	6.95E-06	1.23E-05	4.56E-07	4.54E-07	6.24E-06	2.97E-06
TGAGGGTCTGTGAT	4.21E-06	1.55E-06	9.55E-05	5.59E-05	4.83E-08	3.73E-06	4.08E-05	4.30E-05	8.84E-08	8.70E-08	1.84E-05	1.19E-05
GGTGATGTTATCAT	0.000473477	0.000436601	0.000106589	9.16E-05	0.000382798	0.000347555	0.000118534	0.000166576	0.000317238	0.000327929	0.000129093	0.000143828
TTATTACGTCAAAA	1.69E-06	2.23E-06	9.37E-06	1.18E-05	6.55E-07	1.99E-06	5.83E-06	2.87E-06	5.48E-07	5.46E-07	3.23E-06	6.87E-07
CCAACATATTAAAA	0.001151201	0.001108753	0.000425145	0.000545652	0.000913993	0.000662346	0.000496744	0.00041171	0.000580762	0.000735751	0.000501213	0.000483552
TCACGCTGGGAAGC	0.000232019	0.000221053	3.63E-06	1.25E-05	0.000138976	9.47E-05	9.64E-06	2.02E-05	8.88E-05	8.14E-05	1.10E-05	7.24E-06
TCCGAAATGATGGG	1.06E-06	1.07E-06	0.000170586	0.000124319	1.03E-06	1.03E-06	6.58E-05	7.96E-05	1.02E-06	1.02E-06	3.71E-05	4.10E-05
CCTCAAGTTGTCTA	0.00024482	0.000161608	0.001958663	0.002118869	0.000126807	0.000113568	0.002518985	0.002794244	0.000401547	0.00035376	0.002756514	0.002498108
TCCGTGATCGACCG	8.37E-06	2.76E-05	0.000222431	0.000388882	1.30E-05	1.47E-05	0.000257709	0.000205274	2.49E-05	1.90E-05	0.000285236	0.000282481
TGGTGGGGGTGGTG	0.000840302	0.0007329	0.000645268	0.000463906	0.000901284	0.000849115	0.000545758	0.000629398	0.000574469	0.000658172	0.000552988	0.000480944
GTAGAGAGTCCCTA	2.24E-05	1.61E-05	0.000146718	0.00016349	2.66E-06	7.65E-06	0.000153382	0.000124996	1.27E-05	4.36E-06	0.000122234	0.000119429
ACTATTAGCTTCGT	8.19E-05	0.000244124	3.72E-05	3.73E-05	0.000168135	0.000160315	2.89E-05	1.21E-05	0.000125508	0.000107312	2.57E-05	2.13E-05
CTTTAGCTGCGGTG	0.00010281	0.000108638	1.09E-06	4.14E-06	7.04E-05	7.52E-05	4.19E-06	1.04E-06	5.32E-05	4.47E-05	1.23E-06	1.13E-07
TTTGGGTTGCACTA	3.31E-06	1.07E-06	7.74E-05	8.79E-05	7.05E-06	1.88E-06	8.66E-05	8.17E-05	1.44E-05	3.43E-06	7.44E-05	5.14E-05
GTTTGAGTATTTTT	1.06E-06	8.39E-06	4.36E-05	4.75E-05	1.03E-06	1.03E-06	1.53E-05	1.59E-05	4.00E-07	1.28E-06	6.96E-06	5.42E-06
CCTGTAGAAGTGAT	2.51E-05	4.67E-05	1.31E-06	2.07E-06	1.20E-05	3.26E-05	2.80E-09	7.02E-07	1.20E-05	1.25E-05	1.60E-06	1.43E-06
CACTGAGGTTAGCT	2.11E-06	1.41E-06	6.12E-06	9.26E-06	4.25E-07	4.26E-07	6.96E-06	1.93E-06	3.83E-06	1.85E-06	4.86E-06	6.43E-06
GCAGGACCCGTGGG	2.37E-06	1.64E-06	8.73E-06	1.34E-05	3.88E-07	3.88E-07	7.39E-06	3.22E-06	5.18E-07	5.16E-07	2.51E-06	3.15E-06
AGACCTTTCCGTCC	7.86E-07	1.75E-06	2.85E-05	2.90E-05	1.18E-06	1.71E-08	8.82E-06	1.87E-05	1.12E-06	3.25E-06	6.20E-06	3.46E-06
GTGGGGGATCCGCG	1.62E-07	3.87E-08	1.57E-06	1.48E-05	4.82E-07	4.83E-07	5.00E-06	1.28E-06	4.81E-07	4.79E-07	2.51E-06	5.26E-06
TGGGGCGGCACGTC	1.61E-05	1.62E-06	9.72E-06	2.66E-05	1.10E-05	9.66E-06	1.02E-05	1.14E-05	4.67E-07	9.65E-06	5.28E-06	3.03E-06
TTCTAGGGGCGGTG	0.001225298	0.00101	0.002706872	0.001873011	0.001272755	0.001303394	0.002283209	0.002572767	0.001173572	0.001181975	0.002232899	0.002309694
GACCATGTTATGGA	4.40E-06	7.47E-07	1.26E-05	1.29E-05	2.68E-07	2.69E-07	1.86E-06	1.42E-05	5.43E-07	5.42E-07	2.27E-06	1.92E-06
GGCCCATCTCCAAT	0.000101503	9.70E-05	2.03E-07	7.48E-06	6.97E-05	5.08E-05	1.20E-06	3.58E-06	5.26E-05	2.77E-05	1.47E-06	6.97E-07
TGTCTGCAGGGTGG	0.000653198	0.000338851	0.004363	0.002738669	0.000332858	0.000257628	0.000996576	0.000960999	0.000303387	0.000220514	0.000547624	0.000829924
ACAATTATGTTGTC	9.97E-05	7.02E-05	0.000263962	0.000448945	6.34E-05	4.82E-05	0.000344175	0.000381751	5.66E-05	7.36E-05	0.000277853	0.000253395
TTCTGATCATGATG	4.57E-05	2.23E-05	1.87E-05	9.22E-06	7.79E-06	1.68E-05	6.13E-06	7.11E-06	7.56E-06	5.65E-06	2.50E-07	2.51E-07
CAGGTTGCACAGTG	8.77E-05	0.000187315	1.09E-06	7.46E-05	0.0001294	0.00010751	4.21E-05	1.24E-05	9.28E-05	5.84E-05	2.84E-05	2.21E-05
CGTATTAGGAGTCG	3.72E-05	3.46E-05	4.90E-05	2.80E-05	2.52E-05	2.43E-05	1.79E-05	2.81E-05	2.08E-05	2.34E-05	1.18E-05	1.33E-05
GTGGTTAATTGTGC	1.06E-06	3.10E-06	1.15E-05	1.06E-05	1.54E-06	3.75E-07	4.39E-06	6.77E-06	4.73E-07	4.72E-07	3.11E-06	5.08E-06
AGAGCGGGTATAAC	0.000899093	0.000687292	0.000274041	0.000337637	0.000424195	0.000503257	0.000307485	0.000377729	0.000257915	0.000318802	0.000168614	0.000173894
GAATCAACCGGTCC	1.52E-05	1.18E-05	6.65E-06	6.78E-06	1.53E-06	5.71E-06	2.88E-06	3.30E-07	9.10E-07	5.59E-07	2.15E-06	1.03E-06
GGAGGTGGGCGGGC	0.000934314	0.000879107	1.09E-06	2.65E-05	0.000628236	0.000696627	1.78E-05	3.29E-05	0.000365516	0.000367923	7.04E-06	1.60E-05
TTTCCTCCACTTCC	4.96E-06	4.88E-07	1.09E-05	1.92E-05	1.87E-07	1.88E-07	1.14E-05	8.40E-06	4.89E-07	4.87E-07	5.04E-06	2.27E-06
TCATCAGGGAGTGA	0.000174317	0.000123616	3.42E-05	2.48E-05	6.08E-05	8.68E-05	1.43E-05	3.14E-05	7.98E-05	5.59E-05	1.72E-05	1.91E-05
GGGCCCCCTTTGTA	7.12E-06	1.07E-06	3.62E-05	5.33E-05	1.03E-06	2.09E-06	2.01E-05	1.91E-05	3.87E-07	1.50E-06	3.70E-06	9.47E-06
GTCTTTGTATGTTA	3.06E-05	1.92E-05	7.40E-05	8.77E-05	1.54E-05	8.03E-06	4.43E-05	7.18E-05	4.85E-06	6.01E-06	3.08E-05	2.36E-05
GTTATGTAGGTGGG	0.00039985	0.000294312	0.000159572	0.000108815	0.000249212	0.000233393	0.000116148	0.000129745	0.00019915	0.000160721	0.000101595	8.80E-05
TTAAAACCGTACCT	0.000199139	0.000222514	5.49E-05	8.93E-05	0.000111459	0.000139816	7.11E-05	4.16E-05	0.000104688	0.000105069	6.62E-05	7.65E-05
GCAGGGGAGCGGGT	0.001323415	0.001296112	0.002021848	0.002380836	0.000907498	0.001094751	0.002376214	0.002580661	0.001061689	0.000874683	0.002317869	0.002297435
CTAGGGCTGTCGTG	1.06E-06	3.23E-06	6.75E-06	2.53E-05	8.67E-08	8.69E-08	1.47E-05	9.70E-06	3.46E-07	1.62E-06	1.13E-05	4.19E-06
GATATTATTGCGTA	1.34E-06	1.40E-07	6.80E-06	1.06E-05	5.39E-07	6.82E-07	3.05E-06	6.29E-07	5.00E-07	4.99E-07	2.99E-06	3.68E-06
GGGTGGTTGTGATC	3.82E-05	6.19E-06	0.000127519	0.000207214	1.03E-06	6.45E-06	0.000133368	0.000149994	4.92E-06	1.43E-06	7.16E-05	9.90E-05
ATGTACGTATGGAT	0.001431636	0.001625705	0.000324398	0.000356573	0.001434206	0.001343363	0.000356575	0.000342121	0.001253453	0.00123478	0.000400234	0.000353514
GTAATGGCATACGG	1.06E-06	3.95E-06	4.98E-05	1.91E-05	2.51E-06	1.12E-06	1.08E-05	7.71E-06	4.39E-07	4.37E-07	5.64E-06	4.56E-06
CCTATAAGGTTGGT	4.86E-05	2.27E-05	0.000713732	0.000616247	1.38E-05	1.60E-05	0.000477663	0.000551989	6.64E-05	2.84E-05	0.000380697	0.000337489
GGAGTATGGCTTGG	0.001351656	0.001031022	0.002898463	0.002089622	0.001357641	0.001427783	0.002122507	0.002560373	0.001280561	0.001219494	0.002621418	0.002266473
GCATCAAAATAAGG	2.43E-05	1.69E-05	0.000252292	0.000131791	6.68E-06	1.03E-06	0.00011432	0.000117955	1.12E-05	1.15E-05	4.61E-05	4.77E-05
TTAAGGGAAGCTCC	1.12E-05	9.96E-06	6.08E-06	6.73E-06	4.02E-06	8.15E-06	6.04E-07	2.66E-07	5.67E-07	1.45E-06	1.42E-06	1.38E-06
TACTCTGCAGGAAT	0.001307565	0.001106596	0.002022155	0.001946803	0.000866635	0.001236559	0.002292202	0.002740184	0.001192934	0.001080378	0.002372277	0.002281535
CAACTCTCAATGAT	0.000357856	0.000352131	3.62E-05	3.14E-05	0.000211458	0.000220574	1.89E-05	2.66E-05	0.000155622	0.000122777	1.47E-05	1.28E-05
AAGGCACGGGGGTT	1.75E-05	9.39E-06	3.14E-05	6.59E-05	4.29E-06	1.03E-06	2.66E-05	3.97E-05	1.02E-06	6.66E-07	2.04E-05	2.27E-05
GGGGTAACTATATT	0.00010215	8.32E-05	7.43E-05	0.000183819	3.26E-05	3.50E-05	0.000160996	0.00020286	2.61E-05	6.16E-05	0.000109158	9.21E-05
GTCGTATCACGCTA	0.000413791	0.000481475	3.36E-05	3.82E-05	0.000244889	0.000263873	1.76E-05	2.07E-05	0.000174862	0.000194719	2.63E-05	3.17E-05
CGGGACGAGGGGAC	8.39E-06	1.89E-05	1.09E-06	1.08E-05	8.07E-07	9.99E-06	1.05E-06	5.03E-07	5.59E-07	6.06E-08	8.33E-07	2.45E-06
GCAAATACGAGGCG	6.54E-06	9.09E-06	2.80E-05	2.65E-05	2.31E-06	1.21E-06	9.98E-06	9.33E-06	1.73E-06	4.12E-07	7.79E-06	3.84E-06
ACACCTTAATTGGG	0.002829064	0.002783173	0.000302125	0.000210192	0.002901958	0.002975959	0.000187874	0.000247642	0.002530372	0.00252554	0.000301122	0.000309283
GTGCGATGAGTGGA	8.81E-06	1.17E-05	1.76E-05	1.74E-05	9.78E-06	8.29E-06	1.29E-05	2.14E-05	4.85E-07	8.92E-06	4.81E-06	2.51E-06
CAATTCAGTGATAT	1.61E-05	1.49E-05	0.000373238	0.000216232	1.03E-06	1.03E-06	0.000195465	0.000185024	1.64E-05	3.49E-06	0.000142647	0.000138016
GTTCGTACACGTCA	2.30E-05	2.45E-05	0.000402907	0.000358919	1.17E-05	1.53E-05	0.000224668	0.000297197	1.12E-05	2.06E-05	0.000123715	0.000140505
TCTGGTCTGAGTGT	2.17E-05	1.44E-05	4.51E-06	4.85E-06	1.01E-05	1.05E-05	1.52E-07	1.54E-07	9.79E-06	1.30E-05	1.22E-07	1.10E-06
TCAGCAGATTTGTG	4.16E-05	6.07E-05	1.09E-06	1.39E-05	2.54E-05	2.67E-05	1.74E-05	2.29E-05	4.88E-06	5.79E-06	2.99E-06	3.02E-06
TTCATAGGACTGGC	6.85E-05	6.00E-05	6.93E-07	1.10E-06	1.76E-05	2.38E-05	8.95E-07	1.07E-06	1.27E-05	9.11E-06	1.36E-07	1.37E-07
GGCCTAATCTCAAA	7.01E-05	4.48E-05	4.81E-05	6.44E-05	2.58E-05	1.61E-05	4.67E-05	2.66E-05	8.77E-06	1.26E-05	6.81E-06	6.92E-06
GTTCGATTACCAAG	0.000254797	0.000313758	7.44E-05	3.20E-05	0.000297648	0.000294766	5.57E-05	3.38E-05	0.000270824	0.000261629	6.29E-05	5.73E-05
CTCTCGGCAGTACA	9.06E-06	1.73E-05	1.09E-06	4.16E-06	1.30E-06	4.35E-06	3.33E-06	1.86E-06	2.50E-06	1.61E-06	1.87E-06	2.58E-06
TATTCAGGCCGGAT	1.14E-05	6.54E-06	7.86E-05	7.04E-05	7.97E-06	1.72E-06	3.17E-05	3.42E-05	1.02E-06	1.18E-05	4.54E-05	3.36E-05
GTTAGCGCAACATT	0.00019356	0.000180271	2.89E-05	3.19E-05	0.000117647	0.000112056	1.42E-05	2.70E-05	7.39E-05	8.95E-05	1.58E-05	2.53E-05
GCGGTCTATCGAGG	3.38E-06	1.07E-06	2.44E-05	1.09E-05	2.52E-07	6.13E-07	5.51E-06	1.13E-05	5.63E-07	5.62E-07	1.31E-06	1.74E-06
TCCTAGGGGTGACT	4.37E-05	3.97E-05	9.88E-05	0.00010414	2.75E-05	3.99E-05	5.40E-05	9.65E-05	1.96E-05	2.87E-05	7.08E-05	6.24E-05
CGTTTGGCGGGGTT	1.06E-06	1.07E-06	6.33E-05	4.84E-05	1.03E-06	1.91E-06	4.53E-05	2.68E-05	4.52E-07	1.22E-06	1.59E-05	1.37E-05
GAGCACTTATTTTT	2.54E-05	1.59E-05	6.52E-05	7.98E-05	1.30E-05	1.52E-05	4.47E-05	3.62E-05	1.34E-05	7.85E-06	1.44E-05	1.31E-05
GTGAAGATTCACAT	2.26E-07	2.40E-07	6.04E-06	8.29E-06	1.45E-06	4.75E-07	5.33E-06	1.27E-06	5.40E-07	3.78E-06	1.87E-06	2.40E-06
TCGAGATCTTTAGG	0.009759908	0.008883841	0.002590009	0.001648341	0.011321578	0.011303409	0.002247068	0.002439435	0.010336151	0.009697836	0.00369599	0.003667329
CTAACCGGGGACGC	0.000103603	9.97E-05	6.96E-05	0.000134055	5.77E-05	7.73E-05	6.47E-05	6.81E-05	3.51E-05	2.22E-05	2.67E-05	3.09E-05
CCTCAATGTGGTGC	3.63E-07	4.04E-06	2.13E-05	3.45E-05	2.62E-06	1.03E-06	2.27E-05	2.97E-05	1.53E-06	1.17E-06	1.51E-05	1.72E-05
TTATTTTTTTATAG	2.00E-05	1.44E-05	0.000189607	0.000240628	2.50E-07	1.13E-05	0.00019	0.000159904	2.30E-05	2.68E-05	0.00016608	0.000141829
GTTGGTAGGGGTTT	4.41E-07	4.56E-07	1.96E-06	5.55E-06	1.06E-06	5.53E-07	2.44E-06	6.24E-07	5.57E-07	5.56E-07	2.15E-06	1.21E-06
GACATGTTGCGGAT	9.23E-05	9.85E-05	8.77E-06	6.72E-06	4.42E-05	4.85E-05	5.57E-06	1.01E-05	1.66E-05	2.89E-05	1.80E-06	3.09E-06
TTTCGCCCGCTAGA	3.93E-05	3.36E-05	0.000245051	0.000224264	1.85E-05	1.11E-05	0.000167621	0.000206919	2.46E-05	2.15E-05	0.000116196	0.000116764
GATTATAAAAACTG	1.09E-05	1.17E-05	3.66E-06	2.45E-06	8.92E-06	7.83E-06	3.73E-07	2.05E-07	3.85E-06	9.27E-06	2.51E-07	2.52E-07
TAACGCCATGCACT	0.001319771	0.0011428	0.002067174	0.001812384	0.001258584	0.001332724	0.001918533	0.002229144	0.001116652	0.001039213	0.002002546	0.002039968
AGCGAGTAATTGGT	0.000447919	0.000308409	0.004102813	0.003882932	0.000286493	0.000157961	0.004303485	0.005013761	0.000671457	0.000645939	0.004669425	0.004450174
CAGTGGGGGCGGAT	1.44E-05	6.55E-06	0.000313444	0.000211287	1.09E-05	1.00E-06	0.000171187	0.00018159	8.88E-06	2.36E-05	0.000172438	0.000158579
TCTTATTGTTAGAA	1.06E-06	1.57E-06	2.35E-05	3.25E-05	1.14E-06	2.56E-07	7.29E-06	9.36E-06	5.08E-07	1.43E-06	3.94E-06	2.26E-06
GGGTGGGTGCGCCT	2.60E-06	6.58E-06	3.23E-05	3.49E-05	1.57E-06	2.27E-07	1.37E-05	3.07E-05	5.32E-06	2.64E-06	1.00E-05	7.80E-06
CTTTGCATTGACCC	1.26E-05	3.41E-06	6.25E-05	6.87E-05	1.06E-05	9.47E-07	4.01E-05	4.09E-05	2.63E-06	5.14E-06	3.57E-05	3.49E-05
GCGGTTATAGAGAT	0.000123694	0.00010226	0.000143138	0.000165494	6.79E-05	6.70E-05	9.84E-05	0.000171586	4.71E-05	6.36E-05	5.58E-05	7.62E-05
CCCATATCGTGCGT	2.28E-05	1.71E-05	0.000527462	0.00049006	2.71E-06	7.38E-06	0.000406948	0.000342616	1.31E-05	4.08E-05	0.000308342	0.000259134
GATCTTAGTCCGCG	1.99E-05	2.75E-05	4.74E-05	2.57E-05	2.48E-06	7.96E-06	1.30E-05	6.65E-06	3.83E-06	5.31E-06	6.01E-06	5.15E-06
GGGGATGGGTCTTG	1.06E-06	6.49E-06	4.66E-06	4.08E-05	2.71E-06	8.07E-07	1.53E-05	2.53E-06	6.52E-07	7.09E-07	9.61E-06	8.42E-06
AATGTCATCGTGTG	3.67E-06	1.50E-05	0.000110934	0.000109528	1.03E-06	1.61E-06	5.64E-05	8.96E-05	6.89E-06	1.91E-06	1.94E-05	1.97E-05
TATGAACTGGTGCG	0.00012994	0.000106335	3.40E-05	8.56E-06	1.68E-05	1.65E-05	4.07E-05	2.48E-05	7.76E-05	0.00016276	5.19E-05	0.000102802
TTGGCTTTAGCTTT	8.68E-07	1.14E-06	5.45E-06	4.48E-06	1.19E-06	4.89E-07	2.10E-06	3.86E-06	2.19E-06	5.54E-07	2.25E-06	1.19E-06
GTACAGGATGCGAG	5.40E-05	2.79E-05	0.00105802	0.000751494	2.79E-05	5.50E-06	0.000557875	0.000591047	4.20E-05	4.47E-05	0.000354189	0.000376633
GTGTTTAGATATCA	0.000179976	0.000119807	0.00011689	0.000160464	0.00012133	0.000102767	0.000125368	0.000126379	0.000137789	0.000123583	0.000115176	7.68E-05
CACCATTCTCTGAT	1.43E-05	1.50E-05	0.000104576	7.71E-05	1.03E-06	1.14E-06	4.04E-05	6.21E-05	7.31E-06	7.84E-07	2.97E-05	2.22E-05
AGAGAAACGGGGGG	8.13E-06	4.39E-05	9.54E-06	7.94E-06	4.25E-05	2.30E-05	1.04E-06	2.37E-06	1.94E-05	3.87E-05	2.48E-06	1.29E-05
CTGTACTAGGGCGG	0.000122058	0.000105515	7.71E-05	6.57E-05	6.74E-05	6.48E-05	4.97E-05	5.45E-05	3.01E-05	3.57E-05	2.93E-05	2.48E-05
GGGGGCGGGAGTGT	0.000670079	1.07E-06	0.000241268	0.000426027	1.03E-06	0.000613507	0.000439124	0.000354871	0.000729447	1.02E-06	0.000419771	0.000394315
TTTTTAACATTGAT	0.004276036	0.004131856	0.002020364	0.001558017	0.002854291	0.003992431	0.002043827	0.002083235	0.004662095	0.004293516	0.00182237	0.00179979
GTTGGCCCCTTATA	0.000255733	0.00024876	0.000271133	0.000401882	0.00014804	0.000157333	0.000275959	0.000211282	0.000151496	0.000172645	0.000233196	0.000196888
GGGCGGAGTGGACC	1.47E-06	2.80E-06	7.69E-06	1.31E-05	1.12E-07	1.12E-07	1.13E-05	1.20E-05	3.64E-07	3.63E-07	5.52E-06	8.95E-06
TAGGCAGGCAGATG	1.39E-05	2.44E-05	1.54E-05	1.52E-05	1.37E-05	1.62E-05	1.56E-06	4.46E-06	2.19E-06	4.15E-06	2.32E-06	1.15E-06
CGTTGACTGCCTGG	2.31E-06	3.82E-07	3.59E-05	2.59E-05	4.69E-06	8.98E-07	4.00E-06	9.63E-06	4.11E-07	1.25E-06	4.79E-06	7.01E-06
AGGTGGGGGTCTTT	0.001490245	0.001263194	0.000579386	0.000540456	0.001130867	0.001216177	0.000491986	0.000493693	0.001166037	0.001138762	0.000515724	0.000481219
ACAGGGTGCATTGG	2.00E-05	2.82E-05	1.23E-05	1.33E-05	1.08E-06	7.30E-06	1.00E-05	5.06E-06	8.88E-07	3.86E-06	2.34E-06	2.05E-06
ATCTCTGCGTTATC	0.000335965	0.000319313	0.000360383	0.000531555	0.000202245	0.000234277	0.000442025	0.000627499	0.0001477	0.00012256	0.000477026	0.000422494
GTCGTAGGTACTCG	4.40E-05	9.59E-06	0.000340189	0.000280815	5.17E-06	1.03E-06	0.000242807	0.000351534	1.76E-05	2.17E-05	0.000221083	0.000172002
GGTAGGCTAAGCAA	4.54E-06	1.61E-05	4.83E-05	6.95E-05	3.93E-06	1.04E-06	3.71E-05	2.00E-05	2.77E-06	1.65E-07	3.18E-05	2.19E-05
GGCGAATACAGTCA	3.30E-05	6.56E-05	0.000449427	0.000444303	2.92E-05	3.70E-05	0.000398013	0.000385881	8.01E-05	4.86E-05	0.000318264	0.000351661
GTTCAATGCCGGTC	4.85E-06	1.48E-06	1.54E-05	2.58E-05	4.84E-07	2.92E-06	4.89E-06	1.25E-06	4.41E-07	4.40E-07	4.80E-06	5.26E-06
CGTTGCTGCCGAGT	9.08E-05	2.57E-05	0.000921715	0.000712194	2.36E-06	1.53E-05	0.000547134	0.000700628	4.68E-05	3.83E-05	0.000381876	0.000406348
AATATGCTAAAGGA	2.30E-06	9.25E-07	5.02E-06	4.45E-06	4.81E-07	4.81E-07	1.52E-06	4.84E-06	2.17E-06	5.30E-07	2.25E-06	2.60E-06
CTGCTTTCCAGCTA	0.00040028	0.000963422	0.000208793	0.000282934	0.000586621	0.00042639	0.000319847	0.000122904	0.000369316	0.000387419	0.000177525	0.000228116
TTGTGGCCTCGCCG	0.000196479	0.000175785	4.29E-05	6.05E-05	9.78E-07	0.000168534	3.09E-05	2.75E-05	0.000142516	0.000133652	1.28E-05	2.75E-05
GCTCGATCCTTATG	7.41E-06	1.02E-05	2.20E-07	8.68E-05	9.87E-06	3.64E-06	6.66E-05	7.58E-05	4.12E-06	5.60E-06	3.61E-05	6.00E-05
AAGACCACCTGATA	7.81E-06	3.83E-06	0.000117596	9.20E-05	1.41E-06	4.49E-06	8.77E-05	7.59E-05	1.14E-05	2.40E-06	5.43E-05	6.98E-05
CTGACATGGGAGGG	1.06E-06	1.99E-07	2.67E-05	1.63E-05	3.64E-07	3.64E-07	4.92E-06	6.78E-06	5.15E-07	5.13E-07	2.51E-06	3.33E-06
GTATTATTTGTACG	7.85E-07	3.29E-06	6.99E-06	5.46E-06	1.63E-06	9.37E-07	5.07E-06	1.90E-06	4.84E-07	4.83E-07	6.00E-06	1.57E-06
TGGGGGGTAACCAT	6.50E-05	8.33E-05	4.42E-06	1.10E-06	5.45E-05	4.68E-05	7.41E-06	5.91E-07	3.21E-05	3.98E-05	1.82E-06	1.69E-06
AGTCATCGCTGCTA	1.48E-06	1.19E-05	5.19E-05	6.55E-05	5.90E-06	5.40E-06	5.32E-05	3.38E-05	1.77E-05	7.37E-06	5.13E-05	4.01E-05
ATATGTAGGCATTT	0.000166702	0.00013006	6.96E-05	5.06E-05	7.98E-05	9.55E-05	3.24E-05	2.10E-05	5.38E-05	3.12E-05	1.23E-05	2.88E-05
GATGGGAGTGCGGG	0.000326468	0.000242192	0.000225466	0.000168463	0.000118766	0.000155428	0.000124257	0.000161631	9.86E-05	0.000106538	9.76E-05	9.64E-05
GTACCCGTGACGTT	2.00E-06	9.15E-06	3.21E-05	3.15E-05	4.31E-06	8.59E-06	3.03E-05	3.06E-05	8.50E-06	5.07E-06	1.41E-05	1.51E-05
TAGTCAAGCTGTAT	0.000959729	0.001125448	0.000171912	0.000159099	0.001000693	0.000872395	0.000152368	0.000114488	0.000810283	0.000806473	0.000178107	0.000178087
GTGCGCGTGGTTGG	7.35E-06	1.64E-05	0.000118562	9.74E-05	3.66E-07	4.13E-06	3.24E-05	6.27E-05	4.44E-06	7.14E-06	3.38E-05	3.50E-05
AATGAAATATCTAT	0.001418005	0.001273201	0.002745188	0.002204018	0.001523687	0.001356067	0.001858092	0.001882684	0.001071446	0.001029001	0.002279382	0.002242902
GCTTGTATCCAGCT	0.003964176	0.00511087	0.000161758	0.000187962	0.006604283	0.006749279	0.000251385	0.000310404	0.007960325	0.007403784	0.000776885	0.000777478
TGTCAAGGTCTGCG	5.70E-06	3.51E-07	3.15E-05	2.76E-05	8.75E-07	2.19E-06	9.31E-06	1.52E-05	5.01E-07	5.00E-07	4.68E-06	1.92E-06
GTTATAGGGATCGG	0.000199652	0.000215147	5.53E-05	4.30E-05	0.000108472	0.000135077	2.75E-05	6.28E-05	5.81E-05	7.15E-05	3.56E-05	3.01E-05
GACGGCATAGGATG	0.000285303	0.000282575	0.000162628	8.01E-05	0.000197977	0.000230367	6.26E-05	7.87E-05	0.000145901	0.000120649	5.29E-05	4.30E-05
ACAGGTAAAGGATT	2.06E-05	2.49E-05	9.93E-06	8.85E-06	1.51E-05	3.11E-06	1.83E-07	1.70E-06	1.72E-06	1.76E-06	2.48E-06	3.78E-07
GTTGTCTAGTTCAT	1.30E-05	2.33E-05	1.09E-06	5.42E-06	9.02E-06	1.18E-05	1.50E-07	1.52E-07	4.66E-06	3.49E-06	3.17E-07	3.17E-07
GCTGGGGGGGCGTA	1.06E-06	1.07E-06	0.000149338	0.000161038	1.03E-06	1.03E-06	0.000147622	0.000120337	3.02E-06	2.09E-06	9.95E-05	0.000106062
ATAATCAGAATCAA	0.000242818	0.000123658	0.002883842	0.0029171	3.37E-05	6.80E-05	0.003181116	0.004116847	0.000220732	0.000426321	0.004832238	0.004105797
GTATCGGGGGAACG	9.30E-05	8.85E-05	0.000984475	0.001862174	2.61E-05	1.03E-06	0.001891765	0.001959461	0.000124969	0.000111403	0.001826201	0.001750386
ACTGCTGAGCCGAG	4.20E-05	1.44E-05	0.000561589	0.000484109	6.92E-06	1.72E-05	0.000313891	0.000346367	2.50E-05	1.87E-05	0.000239777	0.000219046
GCGGTAGTAGGCTC	8.51E-06	7.18E-05	4.81E-05	0.000128683	2.03E-05	2.97E-05	0.000154953	2.71E-05	4.16E-05	5.04E-05	0.000116784	0.000136548
CTACACTTTGGAGG	1.06E-06	1.07E-06	0.000129608	8.11E-05	1.03E-06	2.66E-06	5.57E-05	7.70E-05	1.02E-06	7.57E-06	4.91E-05	4.93E-05
AACGTTTGAGCCTG	5.57E-06	8.76E-06	5.68E-05	4.35E-05	1.23E-06	6.27E-08	1.42E-05	1.13E-05	5.17E-07	5.16E-07	9.47E-07	4.73E-06
GGCCTGTTCCTGAG	0.000312063	0.000347941	0.000158498	0.000177246	0.000258284	0.000242988	0.000133231	0.000162168	0.000163279	0.000161739	0.000122632	9.30E-05
CAATTGTCTGGAAT	0.002205568	0.00230141	7.95E-05	5.35E-05	0.002794581	0.002714766	4.19E-05	8.44E-05	0.002517976	0.002616036	0.000222641	0.000191038
GGATGAGTTGTGTA	0.000139012	9.13E-05	0.001194578	0.001111796	5.05E-05	2.27E-05	0.001011441	0.001257137	0.000114611	0.000118287	0.001207691	0.001159371
ACTTGGGGCATATT	0.000317569	0.000304113	4.44E-06	8.66E-06	0.000295609	0.00026957	7.97E-06	7.70E-06	0.000176183	0.000166167	7.99E-06	2.51E-06
TTGCATTAAAGCCC	1.60E-06	6.01E-07	4.56E-06	4.57E-06	5.41E-07	5.42E-07	1.00E-06	2.57E-06	5.55E-07	5.54E-07	2.63E-06	8.63E-07
GAAGGCAGAGAATC	9.99E-05	0.000134608	7.52E-06	4.49E-06	4.41E-05	4.12E-05	1.19E-05	8.89E-06	7.00E-05	3.20E-05	3.71E-06	5.51E-06
TCGCGTTTGCTATC	0.000558829	0.00065084	1.90E-05	4.08E-05	0.000525539	0.000549028	2.68E-05	2.26E-05	0.000404826	0.000375814	5.24E-05	4.28E-05
GGACTGTGGGCGCA	7.26E-07	2.35E-07	6.10E-06	8.38E-06	3.01E-07	3.01E-07	6.20E-06	8.40E-06	5.34E-07	5.33E-07	1.19E-06	3.50E-06
CTATTTCGTTGTGC	0.00049196	0.000429911	0.000322352	0.000437796	0.000364567	0.000331194	0.000318508	0.00046137	0.000275235	0.000246038	0.00024513	0.000251234
ACGAGTCGGCCGGA	0.000591229	0.000651001	5.63E-05	7.08E-05	0.000437025	0.000440638	4.83E-05	5.56E-05	0.000196967	0.000226496	5.36E-05	3.76E-05
TGTTACTGGCTGGA	8.02E-05	8.37E-05	2.38E-05	2.15E-05	3.40E-05	3.71E-05	6.87E-06	1.65E-05	1.74E-05	6.57E-06	4.01E-06	6.89E-06
GAATTAATAGCAGC	7.27E-05	8.31E-05	5.26E-06	1.09E-05	5.37E-05	3.47E-05	2.48E-06	3.68E-06	4.29E-05	3.51E-05	1.62E-05	8.63E-06
GTTGTATTGCGCTC	9.82E-05	0.000108849	4.95E-05	7.75E-05	9.16E-05	0.000107905	6.19E-05	6.53E-05	5.30E-05	3.57E-05	4.95E-05	3.94E-05
TGCGTTAGGAGTGT	8.29E-06	7.21E-06	4.63E-05	4.28E-05	5.41E-06	1.03E-06	2.19E-05	1.90E-05	6.06E-06	7.38E-08	1.59E-05	1.50E-05
AGATGCTACTAGGG	1.06E-06	1.07E-06	3.36E-05	1.32E-05	1.27E-07	4.88E-07	1.03E-05	1.23E-05	5.04E-07	1.15E-06	3.11E-06	3.32E-06
GCCCGTTGACTGTA	1.48E-05	3.00E-06	0.000216987	0.000183835	3.14E-06	8.79E-06	0.000134803	0.000156049	1.29E-05	8.62E-06	9.84E-05	8.62E-05
TAAAAGAACTCATT	4.24E-06	1.07E-06	5.03E-05	4.77E-05	4.19E-07	4.39E-07	2.68E-05	2.29E-05	1.10E-07	1.09E-07	2.19E-05	7.19E-06
GTGCATGTGGATTT	0.000144706	0.000124041	0.000125953	0.000167564	4.17E-05	2.79E-05	4.15E-05	5.24E-05	8.23E-06	8.30E-06	1.96E-05	6.98E-06
AGGCAGGGTGTTGG	2.97E-05	2.90E-05	0.000402921	0.000272559	1.03E-06	9.26E-06	0.000206784	0.000227591	1.17E-05	5.66E-06	0.000107798	9.80E-05
TCGATCTGTCGGCG	9.95E-05	9.43E-05	0.001289443	0.001213764	4.11E-05	2.65E-05	0.000978164	0.000842087	0.000125089	0.000122314	0.00096062	0.000998273
GCTCCACTTCGGTG	1.03E-06	5.81E-06	2.17E-05	2.04E-05	2.12E-07	2.12E-07	1.03E-05	8.40E-06	4.11E-07	6.48E-06	7.85E-06	3.77E-06
TGGTCATCGTGTCG	0.00100791	0.000933418	0.00100406	0.000951188	0.000597222	0.000670073	0.000714096	0.000786827	0.000410318	0.000441261	0.000491223	0.000489696
TTGAACTCACTAAA	3.62E-06	1.07E-06	1.28E-05	1.50E-05	2.70E-07	2.70E-07	7.30E-06	8.73E-06	4.54E-07	4.52E-07	2.15E-06	7.19E-06
ATATTAGTAACTGA	3.07E-05	2.02E-05	3.06E-05	3.75E-05	1.26E-05	1.16E-05	2.08E-05	1.29E-05	2.96E-06	4.42E-06	7.24E-06	7.63E-06
TCTGTAGGTCCACC	3.73E-06	3.92E-06	3.44E-05	4.96E-05	1.03E-06	1.03E-06	1.37E-05	3.14E-05	4.18E-07	4.16E-07	4.56E-06	6.84E-06
GCATACCCTATGCA	0.001090549	0.001169802	4.13E-05	2.23E-05	0.000596369	0.000590202	1.11E-05	2.67E-06	0.000228896	0.000251702	3.03E-06	1.97E-05
TACTCAACTGCATC	2.28E-06	6.20E-06	2.19E-05	2.55E-05	3.41E-07	2.01E-06	8.56E-06	4.17E-06	3.29E-07	3.28E-07	1.11E-05	5.44E-06
CACGCCGGGAGGGA	0.001167692	0.00115578	4.29E-05	1.18E-05	0.000564744	0.000574882	2.55E-05	6.85E-06	0.000247767	0.000230447	7.76E-06	4.23E-06
GACACGAGACAGGC	6.28E-06	1.86E-06	7.24E-05	6.58E-05	8.32E-07	4.27E-06	4.05E-05	6.33E-05	2.03E-07	3.20E-06	2.74E-05	3.49E-05
GGGGGTCGTGGTTA	1.06E-06	1.07E-06	1.11E-05	4.49E-05	1.03E-06	1.03E-06	4.24E-05	4.84E-06	3.87E-07	1.02E-06	2.60E-05	2.58E-05
CGTTCCAAGTGGCA	3.24E-06	0.000131466	1.09E-06	6.18E-06	5.48E-05	7.76E-06	7.84E-06	1.04E-06	4.46E-06	3.17E-05	1.44E-06	9.54E-06
CGTTCTCAGAGAGT	4.68E-06	1.64E-07	7.20E-06	9.32E-06	2.00E-06	6.97E-07	1.07E-06	1.90E-06	6.76E-07	1.44E-06	1.05E-06	6.30E-06
ACGTACTTGGCAAT	5.49E-06	1.24E-06	2.05E-06	1.14E-05	2.31E-07	2.31E-07	7.13E-06	1.07E-05	5.77E-07	5.76E-07	1.55E-06	6.87E-07
TTTTAAGGAATCCC	5.89E-06	1.07E-06	3.97E-05	7.37E-05	1.03E-06	1.03E-06	4.55E-05	2.23E-05	1.35E-05	2.51E-06	2.14E-05	2.37E-05
AGCTGTCCGTTAGC	0.000341969	0.000303936	0.000318515	0.000526281	0.000190988	0.000236594	0.000503773	0.000529863	0.000149286	0.000162701	0.000538552	0.000472365
TGCAGGCGCCTGTG	0.000407525	0.000542856	1.09E-06	5.86E-05	0.000317123	0.0003944	1.04E-06	2.26E-05	0.000258493	0.000201885	4.96E-05	1.04E-06
AGGGTGGGCCGGAG	9.74E-06	1.21E-05	2.41E-05	1.89E-05	6.18E-07	5.02E-06	2.72E-06	1.19E-05	6.83E-06	8.09E-06	3.17E-06	1.74E-06
AAGACTTCACTCGT	4.45E-06	5.32E-06	2.25E-07	7.94E-07	2.99E-06	5.00E-06	3.19E-07	3.22E-07	5.29E-06	3.52E-06	3.08E-07	9.38E-07
CATATATAGGGGGC	1.54E-05	1.10E-05	0.000155308	0.000217732	5.97E-06	4.16E-06	0.000135858	0.000137628	1.16E-05	6.94E-06	9.25E-05	8.02E-05
CATTAAAAACCCCG	0.000542098	0.000466268	0.004347047	0.003304002	0.000377362	0.000370396	0.002714095	0.002580628	0.00052325	0.000522089	0.002332668	0.002242044
GACTATCTCTATTA	1.97E-05	1.59E-05	6.68E-06	4.76E-06	1.01E-05	2.66E-06	1.61E-06	5.98E-06	7.54E-07	4.63E-06	2.46E-06	3.53E-07
TAGTAACTTCAAAA	6.44E-06	1.86E-06	1.81E-05	2.49E-05	3.13E-07	3.14E-07	5.94E-06	8.08E-06	1.04E-06	5.24E-07	2.39E-06	2.79E-06
TAGGGTTCCGAGTG	7.60E-05	7.52E-05	7.03E-05	0.000619989	2.20E-05	2.67E-05	0.000462817	0.000496092	4.13E-05	2.57E-05	0.00030248	0.000331037
TTAGCGCATAGGCG	0.002177512	0.003139422	0.001094461	0.001162829	0.003376292	0.003299548	0.001672582	0.001049964	0.003715706	0.003690639	0.001793328	0.001878621
GGTCGGAGCGCTAG	0.000734909	0.000649593	0.00046531	0.000399015	0.000640757	0.000621529	0.000438767	0.000379676	0.000620822	0.000506691	0.000490475	0.000474099
CGTACTGTGTAAGG	4.86E-05	6.68E-05	6.60E-05	6.05E-05	1.92E-05	2.88E-05	3.07E-05	2.04E-05	2.52E-05	1.02E-05	1.87E-05	1.17E-05
ATGTTGGTTATGCG	0.000111772	9.24E-05	7.79E-05	4.67E-05	6.31E-05	7.20E-05	2.98E-05	2.70E-05	4.44E-05	3.72E-05	1.91E-05	1.86E-05
TCGGATAACCAATA	2.88E-05	2.86E-05	4.86E-06	3.46E-06	9.65E-06	1.69E-05	1.18E-06	7.52E-08	2.87E-06	5.13E-06	3.18E-07	1.12E-06
ACTGTCATTTCCAA	0.000469357	0.000495275	0.000307189	0.000326487	0.000271399	0.000276681	0.000194985	0.000244021	0.000215715	0.000283118	0.000154717	0.00018073
TTTTACCTACCCAT	9.06E-06	2.08E-05	7.49E-05	4.90E-05	4.85E-06	5.34E-06	1.67E-05	2.80E-05	6.04E-06	4.91E-06	6.71E-06	1.58E-05
GAAAAACAGACTCT	2.37E-05	1.75E-05	6.22E-06	5.85E-06	8.69E-06	7.02E-07	2.26E-06	3.02E-07	4.46E-06	2.78E-06	3.28E-07	2.54E-06
GTCCGCGGTATCAT	0.000821311	0.000731203	0.000102154	8.70E-05	0.000414647	0.000438856	7.12E-05	0.00010996	0.000242775	0.000215299	5.18E-05	6.25E-05
AAGTTATAAGTCCA	0.001330765	0.001061563	0.003022548	0.002905935	0.001197828	0.001227067	0.00271345	0.002814293	0.00097265	0.000931681	0.002765511	0.002543226
ATTACTAGGCTCAG	1.13E-06	2.64E-06	0.000127512	9.90E-05	1.03E-06	1.70E-06	6.27E-05	8.38E-05	5.45E-06	7.41E-06	5.38E-05	4.92E-05
CGATTAGACTATGA	4.06E-05	4.23E-05	3.27E-06	1.10E-06	2.47E-05	2.45E-05	1.04E-06	1.04E-06	1.59E-05	2.03E-05	2.53E-06	1.10E-06
GCCTTCCTCAGCAG	0.000299524	0.000309747	0.000687474	0.00058813	0.000241588	0.000213762	0.000556825	0.000507784	0.000154274	0.000127162	0.000464343	0.000464365
GGGGGAGTTGGCGG	6.13E-05	0.000839223	1.09E-06	1.10E-06	0.000439977	0.00029236	1.04E-06	1.04E-06	0.000319489	0.000462625	1.04E-06	0.000224
GGGCAGTTAGTATG	2.71E-06	2.73E-06	9.97E-06	1.66E-05	1.03E-06	1.03E-06	1.42E-05	1.65E-05	3.46E-06	5.35E-08	1.80E-05	1.42E-05
TGCCCGCAGTCTAG	2.63E-05	4.98E-05	4.87E-05	3.59E-05	1.76E-05	2.00E-05	2.47E-05	1.70E-05	1.65E-05	2.89E-06	8.53E-06	3.61E-06
GACGCCTCTGCTTT	8.13E-05	7.89E-05	0.000104337	7.39E-05	1.72E-05	2.41E-05	6.01E-05	6.22E-05	1.05E-05	2.34E-05	1.80E-05	2.73E-05
GGGTGAGCGCAGCT	8.89E-07	1.60E-07	6.74E-06	1.01E-05	4.41E-07	4.41E-07	5.60E-06	2.57E-06	4.62E-06	4.43E-06	6.26E-06	5.85E-06
TTCGGAAGTGTTCC	6.13E-06	9.23E-06	0.000115218	0.00012491	3.85E-06	1.03E-06	7.33E-05	9.09E-05	1.70E-06	4.18E-06	7.22E-05	4.26E-05
GTCGCGAATTCCTC	0.000126998	8.45E-05	9.33E-05	0.000156486	5.93E-05	4.21E-05	7.43E-05	5.26E-05	2.52E-05	3.39E-05	2.05E-05	2.89E-05
GCGGGCGATGTGGG	3.07E-07	3.22E-07	6.68E-06	5.08E-06	1.01E-06	4.05E-07	8.23E-06	1.59E-06	5.50E-07	5.49E-07	4.65E-07	3.33E-06
GCTCCAGTGTGGGG	1.06E-06	1.07E-06	2.66E-05	1.71E-05	1.03E-06	1.03E-06	1.12E-05	1.94E-05	4.97E-07	4.96E-07	5.28E-06	1.57E-06
GTTGTGGAGTGTTT	2.61E-05	1.08E-05	7.59E-05	7.94E-05	2.37E-06	5.83E-06	4.40E-05	5.84E-05	3.14E-06	8.38E-07	2.91E-05	3.12E-05
CAAGCTTCCGCGAC	0.000533534	5.79E-05	0.000255829	0.000456656	0.000247427	0.001866134	0.000855217	0.0005613	0.000984388	0.003154441	0.001561556	0.000921826
TTATGGTGTTGGGG	0.00104927	0.000853252	0.000599563	0.000444547	0.000875931	0.000817064	0.000498676	0.000567739	0.000782209	0.000756762	0.000559278	0.000514515
GTTTTAAAAAAGAA	0.000427186	0.000480433	0.000593848	0.000809069	0.000429139	0.00037431	0.000650607	0.000638358	0.000291372	0.000300862	0.000778719	0.000639594
GCGGGTTAGGTTAG	2.27E-06	1.07E-06	0.000150907	0.000122091	8.04E-07	4.01E-06	0.000101187	6.43E-05	6.24E-07	4.62E-06	5.18E-05	5.11E-05
CTCTTTACCTAATG	0.000153886	0.000133438	2.40E-06	3.68E-05	9.76E-05	9.90E-05	2.25E-05	1.84E-05	7.22E-05	5.28E-05	1.81E-05	2.00E-05
TTTTGTTGAAGTAG	0.000229311	0.000248538	8.48E-05	6.84E-05	0.000222379	0.000173064	5.33E-05	6.62E-05	0.000149346	0.000148735	8.69E-05	7.86E-05
GTGAATGGTGCGGG	0.001446959	0.001140628	0.001534296	0.001069676	0.000868239	0.000978271	0.000854084	0.001149865	0.00095924	0.000820134	0.000801021	0.000755572
TATACTAACTATAA	1.87E-06	2.32E-06	2.42E-05	3.63E-05	9.99E-07	1.98E-08	1.13E-05	1.62E-05	2.99E-07	2.98E-07	1.03E-05	7.90E-06
TTGTACAGATGGTG	1.06E-06	2.70E-06	4.61E-05	4.49E-05	1.69E-07	2.01E-06	2.44E-05	2.81E-05	1.11E-07	2.72E-06	1.28E-05	1.61E-05
ATTACCATCAGGGT	0.016346688	0.017043253	0.003352157	0.002660547	0.018389337	0.018408784	0.003763108	0.004005649	0.020428842	0.019676175	0.005683426	0.005697155
GATACTAGCTACTA	2.23E-05	0.000169901	0.000106331	0.000483988	0.000110865	0.000107614	0.000420647	0.000103309	0.000126947	0.00014913	0.00030273	0.000326869
CAAACAGGAGTAGG	1.06E-06	2.17E-06	4.49E-05	9.92E-06	6.36E-07	1.03E-06	1.48E-05	2.07E-05	2.86E-06	4.18E-07	7.06E-06	4.17E-06
GTATCATGTCAACC	6.20E-06	4.76E-06	3.91E-05	6.40E-05	5.37E-07	1.96E-06	3.10E-05	3.91E-05	3.55E-07	5.17E-06	9.19E-06	5.72E-06
AAATCTTACAGAAT	1.32E-05	2.72E-05	1.09E-06	1.10E-06	9.00E-06	7.39E-06	2.07E-07	7.53E-07	2.40E-06	1.20E-06	3.76E-07	3.77E-07
CCAGCGGGGAGTTA	6.79E-05	6.60E-05	0.000122945	0.000120787	4.39E-05	3.05E-05	5.03E-05	5.14E-05	1.44E-05	1.03E-05	1.54E-05	1.07E-05
ACAAGGGCATGTCG	1.24E-05	9.36E-06	2.44E-05	1.08E-05	4.33E-06	5.77E-06	8.44E-06	2.15E-05	9.34E-07	1.26E-06	8.27E-06	2.78E-06
ACGCCCGGGCTGGA	4.35E-05	5.08E-05	3.22E-06	1.97E-06	1.43E-05	1.10E-05	6.81E-07	5.49E-06	7.54E-06	4.53E-06	8.03E-07	7.19E-07
ACAGTCGAATAACT	0.000192403	0.000258375	4.36E-06	1.10E-06	0.000152967	0.000133011	3.68E-06	4.05E-07	9.83E-05	8.56E-05	5.03E-06	4.95E-06
GCCTAGGTAGTGGG	4.88E-05	2.48E-05	1.47E-05	9.75E-06	3.62E-05	5.35E-05	1.04E-06	6.58E-06	1.08E-05	1.63E-05	6.05E-07	8.73E-07
GGTATTCTAGCACC	0.001108803	0.000953303	0.001381969	0.001783002	0.00105348	0.001081475	0.002084307	0.00252859	0.001137083	0.001146463	0.002117509	0.001969321
GGTCCGGTATTATT	3.54E-05	2.32E-05	9.55E-05	0.000152388	1.15E-05	1.27E-05	8.70E-05	9.15E-05	2.12E-05	1.27E-05	6.04E-05	4.14E-05
GATCTCAGGACACG	1.06E-06	2.90E-07	1.34E-05	2.67E-05	2.03E-07	2.03E-07	7.13E-06	1.20E-05	4.53E-07	1.33E-06	5.51E-06	3.84E-06
GAGACGTGGTCAAT	2.96E-06	1.07E-06	4.21E-05	3.66E-05	1.03E-06	8.50E-07	3.55E-05	4.53E-05	1.02E-06	5.25E-07	2.08E-05	3.04E-05
TGTTCTTACATTAT	3.49E-05	6.11E-06	0.000142207	9.98E-05	2.46E-06	1.57E-05	9.58E-05	0.000126867	3.38E-06	1.50E-05	9.76E-05	8.73E-05
CAACTTAATAAAGC	4.31E-07	1.52E-06	2.04E-05	4.09E-05	1.03E-06	1.03E-06	1.76E-05	1.52E-05	2.21E-07	2.59E-06	1.78E-05	4.88E-06
GGGCGAAGGTGCAG	2.04E-06	1.06E-06	8.33E-05	6.95E-05	1.82E-06	1.03E-06	4.82E-05	5.37E-05	1.83E-06	9.50E-07	1.80E-05	2.46E-05
GGGGTGCCCGGTAG	5.74E-07	8.18E-08	4.51E-06	1.48E-05	8.33E-07	1.11E-06	7.63E-06	1.59E-06	2.19E-06	3.87E-07	6.58E-06	6.47E-06
AGCCTAGGGGTACC	9.26E-05	6.63E-05	4.01E-05	5.77E-05	3.81E-05	2.18E-05	3.05E-05	1.92E-05	2.84E-05	1.16E-05	8.25E-06	1.32E-05
CGTTGCCGCGTTAG	5.73E-05	1.57E-05	0.000865672	0.00063089	3.18E-05	1.54E-05	0.000566779	0.000611242	4.00E-05	5.71E-05	0.00060793	0.000498726
GGGGCAGGGGGATG	3.23E-05	0.000114504	2.35E-05	4.12E-05	7.29E-05	3.77E-05	6.93E-05	1.37E-05	3.43E-05	4.42E-05	3.81E-05	5.12E-05
TGGTTTATATAGGA	8.16E-06	4.58E-06	0.00010485	0.000116299	1.03E-06	2.40E-06	5.50E-05	3.98E-05	1.02E-06	1.10E-05	1.63E-05	2.46E-05
CGAGGATTACACGC	5.50E-06	2.58E-06	9.67E-06	1.07E-05	2.01E-06	2.38E-06	7.25E-06	8.35E-06	2.99E-06	3.79E-07	7.90E-06	5.58E-06
GTATAAATAGTGGA	0.000331618	0.000274214	0.000903852	0.001036115	0.00030655	0.000323473	0.00089048	0.001012307	0.000343479	0.000396443	0.000928065	0.000861
GGTAAAGTGCAACC	0.009165614	0.008397932	0.001006972	0.001530418	0.009645927	0.010518098	0.001980432	0.002392361	0.009631318	0.009633554	0.003448116	0.003150416
TATTGAATAGGCGC	0.000371643	0.000400849	4.93E-05	0.00012631	0.000369838	0.000345634	0.00011053	8.33E-05	0.000347651	0.000310251	0.00010787	0.000129255
TCGGCCATGCCGGG	2.82E-05	3.07E-05	0.000463526	0.000426947	3.37E-05	3.28E-05	0.00041305	0.000408196	6.47E-05	7.04E-05	0.000334665	0.000357721
TGACAGGGTCGGTA	1.21E-05	1.60E-05	1.83E-05	9.94E-06	3.00E-06	2.34E-06	5.11E-06	1.25E-05	5.42E-07	5.41E-07	1.79E-06	2.45E-06
TGGCAATTCGGGCG	1.06E-06	7.48E-07	1.66E-05	1.62E-05	1.69E-06	2.35E-06	1.41E-05	3.17E-06	3.65E-07	1.79E-06	4.78E-06	9.64E-06
CAGTTCATCTAGTC	8.60E-05	9.99E-05	0.000493926	0.00092893	0.000112593	4.00E-05	0.001090568	0.000992001	0.000171206	0.000154449	0.001171259	0.001041617
CTGATATTGCCGAA	0.000304053	0.000384377	0.000627208	0.000936886	0.000508554	0.000459549	0.000802013	0.000634141	0.000504641	0.000399948	0.000981693	0.000945287
TTGGTCATATTGTG	5.16E-06	1.54E-05	2.75E-06	0.000103038	5.47E-06	1.52E-06	6.11E-05	2.87E-05	2.50E-06	4.59E-06	1.35E-05	1.87E-05
GCGGATAAAAGGAA	3.37E-05	4.03E-05	1.60E-05	3.16E-05	3.00E-05	1.57E-05	1.25E-05	6.83E-06	3.51E-06	1.22E-05	4.48E-06	6.47E-06
AAGCTTTGCCACGA	0.001003546	0.00094049	0.001802885	0.001851355	0.000990033	0.001090731	0.002161211	0.00226426	0.00107196	0.001047505	0.00212778	0.002142347
CCTGAACTTAGGCT	8.30E-08	2.31E-06	1.43E-05	4.45E-06	8.28E-07	4.13E-07	6.87E-06	2.57E-06	1.49E-06	3.62E-06	3.06E-06	3.80E-06
CTACGATGGGGTAG	0.000119816	9.87E-05	0.000172554	0.000139177	6.41E-05	6.45E-05	0.000106579	0.000102743	2.63E-05	2.34E-05	4.42E-05	3.69E-05
TTTGACATTTGTTC	1.40E-05	1.84E-05	0.000159918	0.000235151	2.78E-05	9.35E-06	0.000123828	0.000170604	8.74E-06	1.71E-05	8.70E-05	0.000113704
GATAAAAGGTTCCA	9.33E-06	8.81E-06	3.53E-06	1.36E-08	1.49E-06	3.69E-06	3.57E-07	3.59E-07	5.32E-07	1.41E-06	2.02E-06	2.79E-06
GTTTTATGGACATT	0.003948031	0.003502481	7.62E-05	6.32E-05	0.003130055	0.003030283	8.54E-05	7.76E-05	0.002715436	0.002607123	0.000175625	0.000186812
TTTTGGAGTGCGCT	4.05E-06	4.15E-06	2.92E-05	2.98E-05	6.05E-08	6.07E-08	9.43E-06	1.62E-05	5.28E-07	5.26E-07	2.63E-06	2.45E-06
GTCCTGTTGCATCA	5.21E-05	3.45E-05	0.000224887	0.000452704	4.91E-05	3.22E-05	0.000389702	0.00044037	4.44E-05	4.05E-05	0.0003126	0.000320249
GCTGGCCGGGCTTT	1.19E-07	3.39E-07	3.41E-06	7.83E-06	3.17E-07	3.17E-07	2.54E-06	1.13E-05	5.28E-07	5.27E-07	1.55E-06	3.50E-06
CCTATCCGACCAAC	2.71E-06	4.20E-06	6.59E-06	1.23E-05	3.95E-07	3.95E-07	7.73E-06	2.57E-06	5.52E-07	5.50E-07	1.79E-06	1.92E-06
TTCCGCGAGGCGCG	1.06E-06	2.01E-06	1.77E-05	3.18E-05	1.22E-06	2.43E-07	7.20E-06	1.00E-05	5.71E-07	5.69E-07	1.91E-06	6.87E-07
TCCTGTGGCTCTAG	4.33E-05	4.35E-05	0.000375803	0.00033511	6.31E-06	9.22E-06	0.000199454	0.000191556	6.89E-06	1.98E-05	0.000126926	0.00010594
ACTCAAACGTTTCT	0.000324834	0.000338112	1.93E-05	1.67E-05	0.000146553	0.000150381	3.19E-06	1.42E-05	8.71E-05	8.56E-05	6.38E-06	1.04E-05
TGAAAACGATTCGT	1.52E-06	7.09E-06	0.000112178	8.67E-05	1.47E-06	1.93E-06	5.32E-05	7.31E-05	7.43E-06	1.02E-06	3.19E-05	4.98E-05
TGTACGACGGTATC	0.016009569	0.016080488	4.03E-05	0.000289175	0.022285405	0.022346832	0.000277323	0.000588602	0.0265792	0.023942036	0.001363158	0.001352222
GCGGGCGGACGGGG	2.48E-05	0.000372947	1.09E-06	1.10E-06	0.000195969	0.000190485	0.000135789	1.04E-06	0.000145825	3.47E-05	9.23E-05	0.00010287
AACCTAGACAAGAC	2.32E-05	2.82E-05	3.42E-06	2.20E-06	9.43E-06	9.10E-06	3.24E-06	3.96E-06	4.59E-06	1.69E-06	3.65E-06	7.94E-07
CCGGGACGTCCCAA	1.06E-06	6.23E-06	1.43E-05	1.13E-05	2.19E-06	9.38E-07	3.19E-06	8.69E-06	4.55E-07	4.54E-07	6.97E-06	2.27E-06
TGATTTGTGTTCTT	2.79E-05	1.59E-05	2.97E-05	3.83E-05	5.47E-06	1.75E-05	3.10E-06	1.21E-07	4.46E-06	1.95E-06	3.52E-06	8.70E-06
AATTTCATTTTAGT	0.000194279	0.00015803	0.000165721	0.000173431	5.58E-05	7.72E-05	5.31E-05	5.97E-05	1.65E-05	2.45E-05	2.40E-05	1.81E-05
CGTCGGCAAGGCGT	7.49E-07	1.16E-05	2.90E-05	2.17E-05	7.72E-08	1.01E-05	1.86E-05	6.00E-06	2.90E-06	1.64E-06	9.80E-06	8.72E-06
CCCAGAACAGCACA	4.54E-07	1.99E-07	9.86E-06	5.73E-06	2.88E-07	4.38E-07	2.20E-06	6.14E-06	4.95E-07	1.65E-06	2.02E-06	4.89E-06
AAGCACGTCTACGC	0.001628916	0.001636104	0.000155294	0.000304458	0.001675806	0.001689337	0.000356285	0.000434299	0.001940621	0.001856681	0.000447784	0.000424099
CGAAATACGTACGT	1.20E-07	5.81E-06	8.61E-06	8.81E-06	5.40E-07	5.41E-07	2.03E-06	1.60E-06	5.28E-07	6.59E-07	1.91E-06	3.15E-06
TGATCTGCTATGAT	0.000473551	0.000405777	0.000369742	0.000292712	0.000282586	0.000319038	0.000345689	0.000329293	0.000321029	0.000227132	0.000303134	0.000272826
TTCAGTAGTTGCCC	0.000473255	0.000500342	1.99E-05	2.46E-05	0.00032254	0.000285099	1.41E-05	8.42E-06	0.000175997	0.000189187	1.67E-05	2.24E-05
TCGGTAATTTAATA	1.60E-05	2.04E-05	9.92E-07	7.02E-06	9.52E-06	7.34E-06	1.39E-06	1.72E-06	5.39E-06	5.03E-06	4.07E-06	7.40E-07
CTTTAGAGTCATGT	8.21E-06	3.62E-06	8.86E-08	5.43E-05	3.31E-06	1.25E-06	1.97E-05	2.26E-05	2.49E-07	1.60E-06	7.91E-06	1.32E-05
GCCTAGTAGTAGTT	0.000175695	0.000192489	9.58E-05	0.000186282	7.83E-05	6.79E-05	0.00011306	0.000110919	6.19E-05	3.91E-05	6.99E-05	4.40E-05
ACAACACGGTTAGC	0.000131955	9.32E-05	3.58E-05	6.36E-05	6.04E-05	3.55E-05	4.18E-05	5.95E-05	2.87E-05	3.39E-05	2.34E-05	8.30E-06
TTCAGCCCTGTCGA	1.41E-05	1.02E-05	7.59E-06	9.39E-06	2.78E-06	3.37E-06	6.55E-06	3.80E-06	1.43E-06	6.79E-06	3.15E-07	3.16E-07
CGTATTGAGGTTCC	0.00055949	0.00032662	0.005356667	0.0070292	0.00017382	0.000197254	0.007738809	0.008581096	0.000705635	0.000662571	0.00807223	0.007495369
CTGGCACGGCTGGG	1.06E-06	1.45E-05	5.86E-05	5.53E-05	8.98E-08	1.03E-06	3.09E-05	2.52E-05	1.60E-06	6.92E-07	9.35E-06	9.63E-06
GGCCGGGCCGAGGG	1.97E-05	2.79E-05	5.41E-05	6.12E-05	6.71E-06	1.56E-05	1.25E-07	6.82E-06	4.70E-06	5.10E-06	9.50E-06	7.07E-06
TCGACCCCGAATGG	0.000910817	0.000689116	0.010302133	0.008060719	0.000977632	0.000824758	0.009711606	0.010390737	0.001459936	0.001263926	0.008241033	0.008185633
TTCACCCCGCCGCT	6.18E-06	6.90E-06	1.41E-05	1.44E-05	8.87E-07	1.74E-06	2.42E-06	1.29E-05	5.33E-07	5.31E-07	3.23E-06	1.57E-06
GGTATCGAATAATA	1.08E-05	9.22E-06	3.54E-05	5.03E-05	2.32E-06	1.90E-06	2.85E-05	2.90E-05	4.27E-07	2.37E-07	4.32E-06	1.74E-05
GGACGAGGGAAGTT	1.48E-05	3.22E-06	5.15E-05	5.76E-05	7.87E-07	1.78E-06	2.74E-05	3.55E-05	4.25E-06	1.23E-06	1.01E-05	2.30E-05
GTTGTGTTGTGAGC	5.99E-05	6.96E-05	1.25E-05	1.79E-05	2.76E-05	3.06E-05	6.71E-06	7.31E-06	1.00E-06	4.48E-06	3.42E-06	3.62E-06
GTGGTGGGCGAGGG	1.06E-06	1.07E-06	0.000523889	0.000497095	8.03E-05	0.000121111	0.000234636	0.00023113	7.83E-05	9.98E-05	0.00015728	0.000152268
TTTTTGGCCTATTG	0.000379574	0.000332966	7.59E-05	0.000602566	0.000293197	0.000321287	0.000686299	0.000613668	0.000227177	0.000221715	0.000558348	0.00060063
CGTTAAAAACGTAC	9.75E-06	9.05E-06	3.97E-05	4.08E-05	4.31E-06	1.49E-05	2.70E-05	1.62E-05	1.24E-06	6.24E-06	9.16E-06	1.20E-05
TGCTTTGCCCAACT	0.000107457	6.69E-05	0.000331735	0.000336378	3.74E-05	4.10E-05	0.000191806	0.000207228	3.47E-05	3.74E-05	8.14E-05	8.83E-05
GTCTAGTGAGATTC	0.000595283	0.000655337	0.000444862	0.000731807	0.000376036	0.000397734	0.000539466	0.000561807	0.000197434	0.00019929	0.000378405	0.000316101
TTGAGCTCTACCTG	0.003908572	0.003384806	0.000144713	3.72E-05	0.003495435	0.003499743	4.69E-05	8.02E-05	0.003068304	0.002772981	0.000139924	0.000117224
ATACCGGTTTAGCT	2.36E-05	2.60E-05	1.28E-05	9.22E-06	1.73E-05	1.60E-05	4.15E-06	1.50E-06	1.74E-06	1.03E-06	3.87E-07	1.19E-06
GTTCCTTAGGTTAA	0.000271931	0.000290849	8.30E-06	1.33E-05	0.000248881	0.000179492	2.13E-06	2.07E-06	0.000118606	0.000146534	1.14E-05	5.63E-06
GCATGTTGATGTTC	1.66E-05	1.48E-05	9.95E-05	0.000153444	1.11E-05	1.29E-05	9.72E-05	0.00010802	1.89E-05	9.18E-06	0.000123661	0.000101
GTTATTCGCAATGT	8.67E-06	1.07E-06	3.61E-05	2.65E-05	1.59E-07	1.17E-06	1.37E-05	7.42E-06	3.86E-06	4.79E-06	3.85E-06	5.69E-06
TGTGCCTGCGAGCT	0.000664209	0.000680269	6.59E-05	9.96E-05	0.000714693	0.0006506	8.08E-05	7.37E-05	0.000597897	0.000546497	0.000141526	0.000122289
AAAATGTTGCGTCT	5.67E-06	4.53E-06	1.35E-05	8.89E-06	1.57E-06	3.82E-06	1.11E-06	8.66E-06	5.51E-07	1.48E-06	4.31E-06	1.03E-06
CGGCCCTGAGTGCT	0.000217638	0.000256661	0.000418233	0.000405151	0.000177703	0.000187563	0.000275552	0.000273907	0.000175314	0.000178727	0.000281281	0.000241648
ATAGCGTGTGGTCA	0.000711553	0.000639455	0.000653601	0.000629918	0.000650554	0.000618475	0.000648704	0.000733129	0.000730738	0.000693675	0.000679846	0.000707755
GTTGTCAAGGCAAC	1.90E-05	1.35E-05	0.000129135	0.000181338	1.03E-06	1.03E-06	7.63E-05	7.05E-05	3.83E-06	1.08E-06	2.72E-05	2.12E-05
CTTATCTATACGGC	0.000719482	0.000728852	8.55E-06	1.35E-05	0.000550633	0.000597464	1.37E-05	1.81E-05	0.000508593	0.00046313	4.08E-05	2.83E-05
CTGCTTTAACCGCA	1.06E-06	1.07E-06	0.000328985	0.000451385	1.03E-06	1.03E-06	0.000435072	0.000140172	1.02E-06	1.02E-06	0.000346142	0.000374932
GAGGGGCGGGGACC	0.000143148	0.000107403	0.000815357	0.001044428	9.35E-05	0.000176032	0.00123878	0.001281899	0.000192313	0.000183051	0.000913519	0.000825565
AGTTCCACCATAAG	1.06E-06	8.32E-06	4.37E-05	3.19E-05	1.26E-06	7.94E-07	1.46E-05	1.39E-05	4.09E-06	1.92E-07	1.05E-05	1.36E-05
CAGCATATCGAAGC	0.000196855	0.000354992	1.61E-05	3.65E-05	0.00021366	0.00022412	1.10E-05	6.80E-06	0.000128756	0.00011053	1.44E-05	2.16E-05
TTCCGCAACCCTGC	1.06E-06	1.80E-06	2.20E-05	9.28E-06	4.79E-07	4.80E-07	2.88E-06	3.54E-06	5.90E-07	5.88E-07	4.65E-07	1.04E-06
ATTCCGCTCTGTCG	0.000442943	0.000351692	0.000840897	0.000788163	0.000444089	0.000509417	0.000882247	0.00090706	0.000463943	0.000416306	0.000822188	0.000954471
AAAAAGGTGGGGGC	0.001036044	0.001160873	0.000100678	0.000162731	0.001021004	0.000947135	0.000144271	0.000168237	0.000698465	0.000704617	0.000157339	0.00017916
TCTGAATATTCCTC	0.000759944	0.000689896	0.000275488	0.000483093	0.000495623	0.000524393	0.000399637	0.000373857	0.000354205	0.000285291	0.00033958	0.000308166
CCTGCGTTCCATAT	0.000253101	0.000332707	4.83E-07	8.82E-06	0.000204175	0.000190552	9.04E-06	8.99E-06	0.000106912	0.000124805	2.60E-06	2.39E-06
ATTGGAAACAGGGA	3.03E-05	3.17E-05	5.23E-06	1.10E-06	1.98E-05	1.62E-05	3.72E-07	1.68E-07	2.12E-05	1.38E-05	1.04E-06	1.47E-06
CTGATGGCTACTTT	6.18E-05	0.000102299	0.002865473	0.002564688	0.000105799	5.27E-05	0.002827645	0.002561856	0.000234277	0.000247948	0.002870338	0.002803838
GTGGAAATCGTGGG	5.29E-05	4.55E-05	0.000193591	0.000135831	1.98E-05	3.73E-05	9.17E-05	0.000101113	1.91E-05	2.48E-05	4.48E-05	4.77E-05
TTCTTAGTATAGTT	1.65E-06	2.08E-07	5.68E-06	9.58E-06	1.12E-06	4.21E-07	9.95E-07	8.07E-06	5.54E-07	1.59E-06	5.72E-07	2.96E-06
TGGCGGGGCCATGG	3.58E-05	1.81E-05	3.19E-05	2.26E-05	1.07E-05	1.12E-05	1.22E-05	1.52E-05	8.13E-06	6.37E-06	2.31E-07	4.03E-06
GCAATGACCGTACG	9.91E-07	5.49E-06	0.000128612	0.00011727	1.03E-06	6.87E-08	9.22E-05	0.000104149	8.67E-06	5.37E-06	8.98E-05	7.82E-05
TTCAACAAGGCATT	4.46E-06	1.07E-06	5.17E-05	5.44E-05	5.74E-07	1.03E-06	4.10E-05	4.04E-05	5.37E-06	2.61E-08	1.34E-05	2.03E-05
TGACAGGGGGGAGA	9.75E-06	3.32E-06	1.58E-05	2.00E-05	1.93E-07	6.63E-07	7.89E-06	1.16E-05	2.09E-07	2.07E-07	1.13E-05	1.21E-05
TCCTAAACGGGCCC	9.18E-06	1.28E-05	8.29E-06	7.37E-06	1.50E-06	6.55E-06	1.25E-06	3.13E-06	5.45E-06	5.91E-07	4.01E-07	7.99E-07
TCTATCTGGTAGGG	0.000311594	0.000281772	1.09E-06	1.10E-06	0.00021325	0.000219184	1.04E-06	1.04E-06	0.000157503	0.000120892	1.04E-06	1.04E-06
TGTGAGGGGGCGGT	0.000226964	0.000151181	0.000253421	0.000384574	0.000139938	0.000109132	0.00042613	0.000506394	0.000188609	0.000196976	0.000404169	0.000353502
GGCGGTCGGCAGGG	0.000334497	0.000508012	0.000206603	0.000211998	0.000280612	0.00026335	0.000179014	0.000161574	0.000210314	0.000192304	0.000121475	0.000119612
TGACACGGGCAATA	3.75E-06	6.07E-07	4.66E-06	1.12E-05	1.33E-06	4.45E-07	3.46E-06	4.50E-06	5.25E-07	5.24E-07	1.55E-06	3.68E-06
TGTGCTTTGAAGTA	7.66E-05	5.34E-05	0.000255534	0.000356605	2.28E-05	4.15E-05	0.000371516	0.000513411	8.52E-05	9.55E-05	0.00050741	0.00051595
GTCATATTACAAGA	7.57E-06	1.62E-06	8.48E-05	0.000110279	4.51E-06	5.20E-06	6.27E-05	5.35E-05	5.02E-06	1.02E-06	5.12E-05	3.98E-05
CCATCTAGTTCAGA	0.004224682	0.00379359	6.55E-05	0.000125893	0.003466465	0.003341154	5.47E-05	0.000128266	0.002945207	0.002661763	0.000227827	0.000195514
TCGACCTACAGTCG	0.000567983	0.000713274	0.000105383	0.000133574	0.000848044	0.000916793	0.000146591	9.26E-05	0.000734147	0.000635083	0.000135295	0.000150788
CACTTGCTGTCGAT	8.80E-07	1.90E-06	8.92E-06	1.56E-05	3.43E-07	3.43E-07	6.20E-06	6.46E-06	2.91E-06	4.67E-07	2.48E-06	5.93E-06
AGGCCCAGTTTGAC	0.000460377	0.000393828	0.000636405	0.000910583	0.000362149	0.000312694	0.00079865	0.00083283	0.000367567	0.00038244	0.000569156	0.000640595
TTTATCTTGGGCCG	0.001687505	0.001574355	0.001466214	0.001082908	0.000840848	0.000814688	0.000524021	0.000542336	0.000309316	0.000258654	0.000264752	0.00020631
GACCTTGGGGCAAC	0.000207086	1.07E-06	8.74E-05	0.000116208	5.87E-05	6.77E-05	2.07E-05	4.81E-05	4.79E-05	7.15E-05	3.26E-05	1.84E-05
TCAGGTCGGGTGGG	2.95E-05	2.42E-05	0.000382484	0.00026393	1.07E-05	2.42E-06	0.000214591	0.000247881	2.04E-05	5.32E-06	0.000117311	0.000107715
CCGTTTCTACATTG	0.00253913	0.002954451	0.000193169	0.000561668	0.002795732	0.002698814	0.000623656	0.000651447	0.002534683	0.0024011	0.001018187	0.001069233
CTTTTGGTAATATG	2.33E-05	2.91E-05	1.09E-06	1.64E-05	8.31E-06	1.16E-06	9.23E-06	2.13E-06	4.08E-07	1.56E-06	8.28E-06	3.66E-06
AGTATTGAGAGTCA	0.000144951	0.000106708	8.17E-05	9.97E-05	8.44E-05	7.88E-05	6.86E-05	8.52E-05	5.59E-05	3.45E-05	3.16E-05	4.08E-05
CAAGGTCGGCGGTG	0.000176576	0.000201735	0.000334157	0.000219287	9.85E-05	0.000112081	0.000151047	0.00014887	5.69E-05	4.67E-05	7.02E-05	9.19E-05
TACCCCTAACCATT	0.000506597	0.000432641	0.000967254	0.001053903	0.000447588	0.000355187	0.000923332	0.000826204	0.00035591	0.000407347	0.000645612	0.000706129
GGACTGGTGGGAGC	0.000278808	0.000219593	0.000236657	0.000358242	0.000119572	0.000117423	0.000187867	0.000286016	4.97E-05	5.35E-05	9.80E-05	9.58E-05
GATGTGCCGCGATC	2.38E-05	1.90E-05	0.000120196	0.000173534	1.09E-05	5.33E-06	4.42E-05	3.57E-05	3.65E-06	1.91E-06	1.49E-06	1.51E-06
GAAGGTATCAAGGG	6.21E-05	6.99E-05	0.000132154	7.66E-05	3.21E-05	3.86E-05	5.47E-05	5.18E-05	2.89E-05	2.76E-05	2.94E-05	3.97E-05
ATAGTCGACCCCTC	1.19E-05	2.66E-05	2.12E-06	1.74E-05	2.25E-05	1.35E-05	4.11E-06	6.96E-06	2.62E-06	1.18E-05	2.94E-06	3.50E-06
CATGCTCCGTTCAC	0.000299263	0.000370573	6.97E-06	2.11E-05	0.000233586	0.000234652	2.22E-05	2.19E-05	0.000168698	0.00013366	1.92E-05	2.45E-05
ATTTGTCCGCTGCC	4.34E-07	2.78E-06	1.59E-05	3.02E-05	1.03E-06	1.88E-07	1.99E-05	3.14E-05	1.49E-06	1.71E-07	1.28E-05	1.26E-05
GTAGTTGCTCGTTT	0.000978124	0.000798776	0.000134273	0.000124447	0.000788035	0.000838758	0.000101177	0.000174415	0.000552071	0.000556471	0.000143425	0.000163192
CTGGCGGAACGTGG	0.00014323	0.001394576	5.49E-05	0.000252411	0.001491885	0.000375445	0.000430607	1.80E-07	0.000239013	9.48E-05	0.000171389	0.00032898
CAGATTATTCTTGA	3.33E-05	8.46E-06	0.000136165	0.000127046	7.81E-06	1.92E-05	0.00010673	0.000116389	1.32E-05	6.73E-06	0.00010417	6.24E-05
TGGTAAACAAAGGT	0.000424402	0.00029991	0.000944752	0.000930264	0.000223389	0.000221023	0.000877861	0.001066875	0.000300676	0.000307882	0.000869	0.000911981
GGGTGTTGTCGGGA	3.07E-05	4.19E-05	7.27E-06	5.35E-06	2.40E-05	1.80E-05	4.61E-07	2.35E-06	2.70E-06	5.47E-06	3.16E-07	1.47E-06
GCTCGCTGTTGAAA	1.06E-06	1.07E-06	1.07E-05	2.48E-05	1.20E-06	3.10E-07	5.76E-06	8.39E-06	1.30E-06	1.74E-06	3.81E-06	4.53E-06
GTGTGTTCACCAGG	0.000556427	0.000552093	0.000143229	5.76E-05	0.000471603	0.000509947	0.000116399	0.000146738	0.000350525	0.000317991	0.000144784	0.000158279
TCCTGTAATAATTA	0.000435288	0.000398996	1.26E-05	1.10E-06	0.000329512	0.00036151	4.26E-06	2.79E-06	0.000143678	0.000178314	5.01E-06	4.36E-06
ACTCCTATTTGGTG	0.000348358	0.000329371	2.78E-05	1.10E-06	0.00021039	0.000196632	1.73E-06	7.21E-06	0.000149157	0.000135313	3.58E-06	6.61E-06
CACTCCGCGACGTC	3.85E-06	1.54E-06	1.63E-05	2.67E-05	3.54E-07	1.70E-06	7.96E-06	4.17E-06	1.42E-06	1.50E-06	2.85E-06	7.87E-06
GCGTGGTAAGACAT	2.70E-08	2.38E-07	3.95E-06	1.67E-05	1.59E-06	5.19E-07	7.35E-07	3.85E-06	1.72E-06	5.62E-07	5.71E-07	2.43E-06
CGCTAATAGTTGGT	4.51E-06	1.24E-05	5.15E-05	5.24E-05	2.01E-06	1.03E-06	1.49E-05	1.78E-05	3.77E-06	1.97E-07	1.08E-05	1.31E-05
TGCAAGGAATTGTT	4.37E-05	4.79E-05	0.000462673	0.000751445	2.49E-05	6.41E-06	0.000446753	0.000436147	2.11E-05	2.54E-05	0.00029362	0.000297033
CTGACGGGGGGTGG	2.68E-05	1.07E-06	0.000279403	0.000176958	1.03E-06	1.03E-06	0.000145088	0.000183488	1.45E-05	1.63E-05	7.98E-05	8.78E-05
TCAGCTTTAGTGGA	3.82E-05	2.73E-05	7.12E-06	8.26E-06	1.24E-05	2.09E-05	2.19E-06	2.14E-06	8.01E-06	4.17E-06	2.63E-07	1.77E-06
TATACTTGGAGTTC	0.000502639	0.000410818	0.000101158	0.000140816	0.000263863	0.000258074	0.000128342	0.000199754	0.000211332	0.000257683	0.000101353	9.80E-05
GTGCTTACCACTTC	1.66E-05	1.07E-06	1.60E-05	2.65E-05	1.03E-06	1.03E-06	1.37E-05	1.52E-05	4.29E-07	4.28E-07	6.73E-06	4.03E-06
GGGCGTTGGGTTTC	9.44E-05	6.32E-05	5.25E-05	4.08E-05	4.74E-05	4.12E-05	2.08E-05	1.66E-05	1.51E-05	1.40E-05	1.02E-05	1.02E-05
ATTGCATCTAGAGA	1.03E-05	7.82E-06	4.63E-05	6.22E-05	1.03E-06	4.95E-06	2.15E-05	5.14E-05	5.18E-07	4.31E-06	7.75E-06	1.79E-05
GGTCGCTACATATG	4.60E-06	6.86E-06	1.20E-05	2.16E-05	3.34E-08	8.31E-07	1.00E-05	1.68E-05	1.86E-06	3.86E-07	9.11E-06	4.01E-06
ATCTCTCGGTTGTT	0.00010937	0.000121126	1.09E-06	1.10E-06	3.38E-05	2.53E-05	4.74E-06	1.04E-06	1.67E-05	1.38E-05	2.24E-06	2.09E-08
GCCTAGTAATCATA	2.60E-05	2.68E-05	0.000108973	0.000152703	2.19E-05	6.45E-06	6.77E-05	4.55E-05	7.93E-06	6.12E-06	2.14E-05	1.30E-05
GATCAATTTTGAGA	0.000136972	0.000129732	1.09E-06	2.28E-06	4.14E-05	4.78E-05	1.87E-06	2.70E-06	4.10E-05	3.58E-05	1.99E-06	1.97E-06
GTCCCTGTCGCTAT	3.36E-05	2.57E-05	3.55E-05	3.03E-05	3.60E-06	2.98E-05	2.86E-05	8.28E-06	2.48E-06	1.21E-05	1.22E-05	1.16E-05
GTGAGGGGGACTAG	0.000411637	0.000460141	0.00018004	0.000148743	0.000336487	0.000335058	0.000136003	0.000133695	0.000327269	0.000284069	0.00012208	0.000139883
CCGCCGGCACCTTC	0.000105042	9.68E-05	0.000116676	0.000183999	6.44E-05	6.38E-05	9.93E-05	6.62E-05	2.40E-05	2.23E-05	3.25E-05	2.84E-05
CCGTTGGGACGATG	5.08E-05	4.30E-05	0.000289769	0.00021006	3.47E-05	3.62E-05	8.71E-05	0.000110964	2.72E-05	4.04E-05	6.20E-05	4.69E-05
CTCTATTTAGACCC	1.06E-06	3.02E-06	9.63E-06	2.54E-05	1.38E-07	1.38E-07	9.43E-06	1.26E-05	3.99E-07	3.98E-07	5.28E-06	7.19E-06
CTTAAACGTACCAC	1.06E-06	1.04E-05	1.44E-05	2.32E-05	1.92E-07	1.92E-07	1.57E-05	3.87E-06	5.57E-07	5.55E-07	1.31E-06	2.09E-06
TCGGGGTGGGGGGT	6.66E-05	6.00E-05	0.000306924	0.000797584	2.51E-06	4.11E-06	0.000657533	0.000790341	2.93E-05	4.02E-05	0.000472098	0.000417061
TTGGACCGCGGTGA	4.49E-06	2.67E-07	5.78E-05	8.49E-05	7.21E-06	2.19E-06	6.40E-05	4.51E-05	1.16E-05	4.33E-06	2.35E-05	3.02E-05
GGTTTTAGGTACAT	2.77E-06	4.14E-07	8.32E-05	6.90E-05	3.43E-06	3.96E-07	5.56E-05	4.59E-05	1.02E-06	1.93E-06	2.44E-05	1.37E-05
CACATTTTTTGTGT	0.000285718	0.000247183	1.09E-06	0.001276667	0.000161577	0.000225168	0.001313439	0.001695119	0.000245833	0.000227323	0.00103081	0.000999127
TGGCCATTCTCAAT	7.69E-06	1.88E-06	0.0001216	0.000114368	1.01E-05	6.72E-06	8.37E-05	9.23E-05	1.02E-06	4.24E-06	6.55E-05	6.13E-05
CCCTACACTGGCTG	9.73E-06	1.84E-05	3.62E-05	3.68E-05	8.13E-06	5.05E-06	1.59E-05	1.21E-05	9.08E-06	5.36E-06	1.21E-05	1.18E-05
TGTTGAGGGGCGTG	0.000265849	0.000270534	9.34E-06	2.62E-05	0.000236625	0.000283992	6.35E-06	9.26E-06	0.000135513	0.000114815	9.32E-06	1.76E-05
TGTCAGCAACCCCA	2.16E-05	3.77E-05	6.17E-05	6.28E-05	2.76E-05	3.82E-05	2.05E-05	2.01E-05	1.88E-05	1.57E-05	1.36E-05	1.40E-05
ACGAGGGGGGTGGG	0.006237859	0.005713186	0.000762547	0.000501427	0.004939244	0.004975335	0.000400973	0.000498374	0.004948359	0.004876822	0.000672615	0.000544445
GCTTGTCGCTCTCG	0.000676532	0.001394696	0.000281316	0.000523291	0.001023314	0.001152078	0.000525993	0.000338374	0.000877716	0.000723272	0.000414904	0.000472277
TGCGGTGGTGGCGC	8.41E-06	1.50E-06	3.57E-05	5.75E-05	1.03E-06	7.17E-06	1.95E-05	1.64E-05	3.45E-07	3.07E-06	9.94E-06	5.58E-06
GATGTCATTATTGT	9.15E-05	7.43E-05	5.86E-05	3.34E-05	2.13E-05	2.62E-05	2.78E-05	3.62E-05	2.64E-05	1.18E-05	8.28E-06	1.14E-05
AAAATGGAGGGGAG	2.28E-05	3.50E-05	4.13E-06	7.43E-06	6.60E-06	2.22E-05	1.48E-06	9.97E-06	1.07E-05	1.36E-05	1.72E-06	9.08E-07
GTTGTTGTACTGTT	1.83E-05	1.08E-05	1.54E-05	1.73E-05	1.07E-05	8.15E-06	5.18E-06	1.56E-05	1.93E-06	4.50E-07	4.54E-06	4.89E-06
AAGGTTACGTTTCA	6.42E-05	5.58E-05	2.48E-05	3.56E-05	4.18E-05	5.07E-05	1.75E-05	1.36E-05	1.79E-05	1.64E-05	1.42E-05	1.06E-05
TGGCGGGCGTTGGA	2.14E-05	2.18E-05	2.11E-05	2.02E-05	5.83E-06	1.11E-05	1.90E-05	1.53E-05	3.48E-06	8.81E-07	7.52E-06	5.04E-06
GGCTGGTGGGGTGG	1.06E-06	1.45E-05	0.000148394	0.000104371	1.03E-06	1.03E-06	7.75E-05	6.28E-05	4.81E-06	4.07E-06	6.17E-05	5.01E-05
TATTGTAATACAAG	1.65E-05	1.02E-05	7.02E-05	3.72E-05	6.32E-06	9.40E-06	1.79E-05	1.56E-05	4.74E-06	7.64E-07	1.05E-05	1.33E-05
AAATTATAGTACCC	0.000666887	0.000568903	2.30E-05	4.05E-05	0.000451858	0.000486255	2.43E-05	3.67E-05	0.000294646	0.000296727	3.71E-05	3.61E-05
ATTTTCGCGAGTCG	8.60E-05	7.21E-05	9.81E-05	9.50E-05	4.33E-05	4.15E-05	4.13E-05	4.80E-05	2.88E-05	1.60E-05	3.37E-05	2.89E-05
TTGTCTAGGATGTT	0.000519348	0.000436573	0.000397624	0.000460819	0.000353316	0.000306335	0.000451481	0.000473744	0.000298096	0.000302957	0.00040937	0.00039091
AAACAAAGGCACTC	3.59E-05	2.89E-05	2.28E-06	3.56E-06	1.10E-05	2.10E-05	7.66E-07	1.19E-06	1.12E-05	6.44E-06	7.29E-07	1.52E-06
CTATTCATGCCTAC	0.000401088	0.000371282	0.000147831	0.000197678	0.000263629	0.000256645	0.000165562	0.00014313	0.00030559	0.000259486	0.000148196	0.000157534
ATTTCGAAACTCGG	1.63E-05	1.17E-05	5.77E-05	3.25E-05	9.99E-06	6.69E-07	3.20E-05	3.19E-05	1.10E-05	9.31E-06	2.05E-05	3.15E-05
CAATAGCTCTTATT	8.50E-06	3.20E-06	2.75E-05	4.02E-05	6.39E-06	8.71E-06	1.74E-05	1.27E-05	6.12E-06	3.65E-06	1.49E-05	1.25E-05
CGGTTAAAATATTG	5.13E-07	2.52E-06	1.59E-06	3.51E-06	5.75E-07	1.37E-06	1.08E-06	9.44E-07	5.93E-06	4.85E-06	1.06E-06	2.82E-07
GTATTGGATAACGT	1.26E-06	2.26E-07	3.79E-07	3.47E-05	1.97E-07	1.65E-06	1.38E-05	5.47E-06	4.62E-07	4.60E-07	3.96E-06	4.91E-06
TGTGTCGTCAGCGG	8.38E-07	1.07E-06	5.08E-05	5.02E-05	1.03E-06	2.57E-09	3.56E-05	2.91E-05	5.80E-06	1.32E-07	1.48E-05	1.27E-05
GCGGTCCTGGGGAT	1.75E-06	1.07E-06	9.54E-05	0.000141931	3.67E-06	1.91E-06	6.55E-05	4.65E-05	6.58E-06	1.02E-06	5.54E-05	2.92E-05
CATGCGTGGGGGCA	1.06E-06	3.99E-06	8.30E-06	5.25E-05	2.89E-06	1.89E-06	1.32E-05	5.11E-06	7.25E-07	9.39E-07	4.55E-06	9.29E-06
TCGTCTGATAAATC	6.55E-06	3.48E-06	8.30E-05	9.90E-05	1.03E-06	4.63E-06	5.71E-05	5.01E-05	7.49E-07	6.26E-07	3.27E-05	3.53E-05
TTGTATAGCGTCGT	9.66E-05	4.74E-05	0.000330903	0.000232826	2.99E-05	3.70E-05	0.000116829	0.000119412	2.85E-05	7.75E-06	4.40E-05	3.89E-05
AATTTGTGGTTGAG	1.86E-05	1.98E-06	0.00023563	0.000200647	1.03E-06	2.66E-06	0.00015016	0.000147109	1.58E-05	8.47E-06	0.0001018	0.00012075
ACCCGCACGTACAT	0.000827953	0.000869658	0.001326838	0.00132323	0.001012779	0.000889152	0.001674355	0.001620744	0.000895819	0.000880049	0.001575878	0.001774295
CTGCTATACTCGCA	3.88E-05	0.000265998	1.09E-06	1.10E-06	0.000268402	0.000140336	1.04E-06	1.04E-06	8.70E-05	8.91E-05	1.04E-06	1.04E-06
GTATCGTTGTCCCA	5.15E-06	4.78E-06	2.52E-05	2.12E-05	4.35E-06	3.96E-06	1.19E-05	2.12E-05	5.63E-06	1.84E-06	6.76E-06	2.71E-06
TAGGGTAGCTTTAG	1.82E-05	1.43E-05	5.59E-05	3.24E-05	8.11E-06	8.20E-06	1.98E-05	1.37E-05	7.90E-06	1.37E-07	1.69E-05	1.04E-05
CTGCACCATTGTAA	6.10E-05	6.49E-05	0.000872783	0.00100108	6.25E-05	1.44E-05	0.000886569	0.000775036	9.30E-05	6.64E-05	0.000791959	0.000766597
ATGGGGCGGACATC	6.68E-07	6.80E-06	4.67E-05	5.94E-05	3.20E-06	4.00E-08	4.25E-05	3.03E-05	1.02E-06	2.51E-06	3.87E-05	2.03E-05
ACCTTGGTGCTGTA	7.34E-05	5.91E-05	0.000132951	0.000168046	4.13E-05	3.80E-05	9.24E-05	0.000141264	4.43E-05	3.44E-05	0.000104217	0.000105967
ACAACAAATTGTTT	8.77E-06	2.57E-06	1.38E-06	5.29E-06	1.66E-06	2.71E-06	3.64E-07	5.44E-06	4.95E-06	2.51E-06	1.95E-06	3.26E-07
CATATAATTCAGGC	0.00176227	0.001597703	1.44E-05	1.89E-05	0.001578686	0.001596774	4.51E-05	3.12E-05	0.001361065	0.001371943	0.000106005	8.46E-05
AGAAGAGCTTTGGG	9.18E-06	1.90E-06	2.28E-05	8.19E-06	7.54E-06	3.11E-06	2.23E-06	9.89E-06	1.88E-06	2.90E-06	4.17E-07	2.57E-06
CCCAGAGGCCTCGG	4.72E-06	1.79E-06	0.000104296	6.08E-05	2.58E-06	1.03E-06	3.70E-05	4.30E-05	6.81E-06	1.38E-05	3.40E-05	2.78E-05
AGTTGTTGTTTTCG	0.000177064	0.0001455	6.09E-05	2.99E-05	6.51E-05	7.18E-05	2.01E-05	4.77E-05	4.48E-05	6.72E-05	1.92E-05	2.35E-05
GGCACGGTGCGTGG	7.73E-06	4.57E-06	0.000174375	0.000135286	1.03E-06	1.03E-06	7.19E-05	0.000171196	3.18E-06	8.30E-06	7.43E-05	4.78E-05
TCCATAAGGGATCA	1.10E-05	3.98E-06	0.000105648	0.000130887	1.03E-06	1.98E-07	0.000107124	9.83E-05	1.02E-06	5.18E-06	5.40E-05	4.14E-05
AAGGAGATAGGCTA	3.43E-06	5.48E-06	3.51E-05	8.08E-05	3.84E-06	1.03E-06	5.78E-05	2.06E-05	4.71E-06	3.83E-06	2.98E-05	3.24E-05
TGGGGTGGCAGGGG	1.06E-06	2.60E-05	3.60E-05	5.88E-05	6.01E-06	5.65E-06	6.01E-05	2.38E-07	6.46E-06	6.81E-06	2.39E-05	1.16E-05
CAATGGGTGGAACA	2.15E-05	3.04E-05	0.000400396	0.000566591	1.29E-05	1.43E-05	0.000450683	0.000501562	3.79E-05	5.03E-05	0.000358506	0.000368701
TCTGTGAGGTTGGG	0.000370327	0.000304259	0.002239255	0.001590589	0.000225485	0.000195688	0.001547222	0.001796127	0.000300655	0.000225194	0.001263773	0.001122254
CTGTGCCCTTTTGA	0.000192213	0.000232721	0.000175815	0.000210243	0.000168168	0.000141113	0.00014556	0.000165682	0.000131522	0.000114891	0.000105247	0.000114123
TGGAAGGCCGCCAC	6.16E-06	4.78E-06	2.72E-05	4.72E-05	9.19E-07	4.40E-06	2.34E-05	2.48E-05	3.50E-07	6.27E-06	2.61E-05	1.84E-05
TGTACACTCTACTA	1.20E-05	1.07E-05	0.000103106	0.000153658	1.03E-06	6.39E-06	0.000128212	0.00014323	1.22E-05	1.29E-05	0.000127305	0.000115805
ATTCCTCTTGCTTC	7.31E-05	6.88E-05	5.83E-05	0.000101034	4.42E-05	3.70E-05	4.09E-05	5.71E-05	1.45E-05	2.12E-05	2.96E-05	3.47E-05
TTCCAGCGGTAGGC	0.000510116	0.000503831	0.000125749	0.000151866	0.000546872	0.000433411	0.000187661	0.000184247	0.000433279	0.000475026	0.000183115	0.000208006
TTTGTTACAGGACT	5.83E-06	1.52E-06	6.34E-05	2.92E-05	5.93E-06	2.19E-06	2.73E-05	3.68E-05	5.10E-06	3.98E-07	6.06E-06	6.25E-06
TGTTCCTAGATTCC	5.41E-06	3.06E-06	3.55E-05	4.03E-05	3.25E-06	1.03E-06	3.51E-05	3.16E-05	3.33E-06	1.02E-06	2.73E-05	2.17E-05
CGGGTAGATGGGAG	1.06E-06	1.07E-06	7.54E-06	0.000200956	2.30E-05	1.03E-06	0.000312827	3.48E-06	1.09E-06	9.39E-07	4.54E-06	7.00E-06
GTACCTTCTAGGGT	8.25E-05	2.29E-05	0.001265466	0.000978193	3.23E-05	1.08E-05	0.000901616	0.001119757	4.53E-05	3.42E-05	0.000726215	0.000778229
AGGAGTACAAGTGG	2.49E-05	6.59E-06	0.00010876	6.92E-05	9.44E-06	3.02E-06	3.57E-05	4.03E-05	1.15E-05	5.93E-06	1.12E-05	1.37E-05
GAAGGGCTTATCGA	0.001047881	0.001001221	4.05E-05	6.52E-05	0.000683282	0.000797492	5.31E-05	8.87E-05	0.000582126	0.000586965	6.91E-05	7.30E-05
CGGCCGGGGTGGGA	4.74E-06	5.54E-06	6.24E-05	7.95E-05	2.49E-06	1.03E-06	3.64E-05	3.07E-05	4.05E-06	2.05E-06	1.06E-05	4.33E-05
CTTGAACCATTGTT	1.06E-06	1.07E-06	3.01E-06	4.08E-05	9.27E-07	1.03E-06	3.44E-05	6.17E-07	5.09E-07	5.08E-07	2.63E-06	3.50E-06
GAATGAGGCACTTT	1.06E-06	3.77E-06	2.41E-05	2.61E-05	2.52E-07	2.52E-07	1.04E-05	6.46E-06	5.19E-07	5.17E-07	4.92E-06	6.87E-07
GTTGTCAGATTGCG	2.38E-05	3.81E-05	1.09E-06	8.56E-06	2.59E-05	3.85E-05	1.18E-06	1.04E-06	1.21E-05	7.18E-06	7.09E-07	1.71E-07
TAGTACAAATCCTT	1.91E-05	1.85E-05	2.80E-05	2.47E-05	7.78E-06	1.51E-05	6.41E-06	7.46E-06	9.14E-06	5.86E-06	7.50E-06	3.67E-06
ACATTAGGTCGTAT	0.000389906	0.000415436	1.09E-06	7.28E-05	0.000363161	0.000385552	4.65E-05	5.15E-05	0.000335363	0.000322205	8.19E-05	5.61E-05
CGCTGAGTAAAAGG	0.008111531	0.006649657	0.004977427	0.003589836	0.0085096	0.008654025	0.004739303	0.005118532	0.011059831	0.010190951	0.005970537	0.005681251
GGGCCCCAAAGATC	6.72E-06	2.31E-06	1.52E-06	2.79E-06	1.39E-06	4.12E-06	3.52E-07	5.74E-07	6.57E-06	5.04E-06	8.09E-07	7.25E-07
GTGAATTCACTCTA	4.43E-05	3.40E-05	1.88E-05	1.52E-05	2.26E-05	1.06E-05	9.50E-06	1.38E-05	1.13E-05	1.46E-05	4.23E-06	2.29E-06
GGTATGGGGTGCCT	1.39E-06	7.34E-07	4.05E-07	8.07E-06	1.69E-06	2.41E-07	6.35E-06	1.10E-05	5.86E-07	5.84E-07	1.07E-06	6.87E-07
GTTGGAGCAGCGGC	0.000106335	6.92E-05	1.09E-06	1.10E-06	5.39E-05	5.65E-05	4.23E-06	5.65E-06	4.07E-05	2.38E-05	1.04E-06	1.04E-06
TATAAGATACGCAG	2.58E-05	2.15E-05	0.000146724	0.000120371	7.14E-06	3.75E-06	7.18E-05	7.07E-05	3.58E-06	2.25E-06	2.22E-05	4.95E-05
TGGGGCGGGTTCGA	0.000387576	0.000385292	4.93E-05	4.89E-05	0.000311618	0.000333571	4.50E-05	2.41E-05	0.000286086	0.000256923	5.17E-05	3.34E-05
GGGTGGGAGGGGTT	0.000204326	0.000200442	1.09E-06	1.10E-06	9.53E-05	9.32E-05	1.04E-06	1.04E-06	0.00011144	0.000128879	1.04E-06	1.04E-06
GTCGACTTTATTTC	0.004785805	0.0049986	0.000116947	0.000146315	0.006482244	0.006554709	0.000288528	0.000267347	0.007874003	0.00728194	0.000806843	0.000752615
ACGGTCACTCGTAT	5.28E-05	3.51E-05	1.09E-06	0.000351649	1.10E-05	1.52E-05	0.000327722	0.00020493	2.89E-05	1.43E-05	0.000157027	0.000124693
ACCCGGTTATCTAG	0.001916945	0.001882941	0.000794736	0.00061787	0.002267815	0.002192739	0.000651365	0.000608865	0.002365744	0.002323196	0.00097256	0.000861394
TCGTACTTCCTACA	1.73E-06	2.23E-06	1.23E-05	2.28E-05	3.22E-07	3.23E-07	7.47E-06	6.13E-06	3.49E-07	3.48E-07	9.38E-06	5.96E-06
ATGGTTTGAAGTGT	1.06E-06	1.07E-06	3.70E-05	2.93E-05	1.03E-06	1.03E-06	8.41E-06	2.56E-05	4.39E-07	4.37E-07	1.07E-06	9.13E-06
GTTGCCTTATTACA	0.000636089	0.000670234	1.09E-06	1.24E-05	0.000498477	0.000515751	9.31E-06	2.24E-05	0.000254393	0.000295059	2.46E-05	2.12E-05
AAGCACCCTGTTGA	4.63E-06	1.50E-06	5.45E-05	3.86E-05	1.03E-06	2.85E-06	3.52E-05	2.39E-05	1.50E-06	2.75E-06	8.96E-06	2.53E-05
CGAATCGTTATCGT	4.08E-05	2.54E-05	1.09E-06	4.15E-05	2.48E-05	1.74E-05	3.49E-05	1.92E-05	1.48E-05	1.62E-05	2.38E-05	2.54E-05
TGTTCGTCCACGTT	1.10E-05	1.69E-06	0.000151523	5.49E-05	1.03E-06	1.03E-06	0.0001127	4.53E-05	6.70E-06	2.52E-06	5.77E-05	7.54E-05
TCTCCATATAGCAA	1.16E-05	7.88E-06	9.33E-05	0.000129659	1.03E-06	8.94E-07	4.92E-05	5.95E-05	3.69E-07	1.08E-06	3.19E-05	3.02E-05
GGCATGTGCAGGGG	2.67E-07	1.15E-06	3.78E-06	9.22E-06	5.65E-07	5.66E-07	1.86E-06	6.31E-07	1.64E-06	4.86E-07	2.50E-06	4.89E-06
GACACTCTGTTCAT	1.06E-06	1.88E-06	1.17E-05	1.35E-05	1.65E-06	2.95E-07	3.54E-06	1.13E-05	5.81E-07	5.79E-07	4.65E-07	1.57E-06
ACTTCGGAGAACGT	5.02E-06	3.24E-06	0.000107483	8.56E-05	1.03E-06	2.29E-06	7.04E-05	5.43E-05	2.82E-06	1.02E-06	4.58E-05	2.33E-05
GTTATACCTCGGGT	0.000340527	0.000298842	0.000402449	0.000405462	0.000212901	0.000261988	0.000248438	0.000375686	0.000159922	0.000148059	0.000244238	0.000201842
AACAAATGGCTGAA	7.51E-06	7.99E-06	6.37E-05	5.02E-05	2.87E-06	1.03E-06	2.01E-05	2.49E-05	1.03E-06	3.16E-06	9.45E-06	5.39E-06
CTTGCGGGTTGTGA	5.26E-06	6.53E-05	4.70E-07	2.01E-06	9.39E-05	9.08E-06	1.95E-06	1.04E-06	6.37E-06	7.01E-06	6.20E-06	6.85E-06
CTAAATGGCAAAGA	1.26E-05	2.45E-06	3.78E-05	2.88E-05	1.78E-06	1.81E-06	9.56E-06	1.22E-05	2.51E-06	5.21E-06	3.27E-06	3.22E-07
GATGTCGGGACGTT	2.04E-05	2.18E-05	0.000167	0.000191431	6.58E-06	1.02E-05	0.000114441	0.000105195	1.10E-05	9.85E-06	7.39E-05	8.06E-05
GTTTTGGATTTTGA	3.67E-06	7.15E-06	3.92E-05	2.40E-05	1.03E-06	1.03E-06	1.49E-05	1.49E-05	1.42E-06	1.04E-07	1.86E-05	1.07E-05
GTGGAATGACTAAC	2.04E-05	3.17E-05	0.000326347	0.000435838	1.03E-06	9.83E-06	0.000224689	0.000263155	2.23E-05	2.87E-05	0.000198052	0.000193303
GTGCCGAGGGAGGG	0.001087105	0.001341858	0.000224752	1.10E-06	0.000794529	0.000840255	0.000206028	0.000155481	0.000786595	0.000662475	9.80E-05	0.000124438
GCAACCTGTATAGA	0.000186285	0.000142453	8.38E-05	0.000127193	0.000164769	0.000106525	6.42E-05	8.92E-05	7.95E-05	6.99E-05	6.67E-05	7.97E-05
GGTCAGTGTTTTAT	1.19E-05	4.97E-06	0.00021013	0.000146452	1.31E-06	8.97E-07	9.39E-05	0.00010443	7.76E-06	2.67E-06	5.62E-05	4.34E-05
CGCTCTACAGACCG	0.000648615	0.000457925	0.000628787	0.001071392	0.000405964	0.000360096	0.001938272	0.002086416	0.000632482	0.000865613	0.001224213	0.001920511
GAGACGAATGGGTA	0.006468645	0.006845169	0.000539161	0.000517514	0.007658002	0.007690831	0.000664694	0.000813345	0.008391801	0.007812026	0.001461148	0.00133949
TGTTGCCAATGGGT	6.70E-05	3.90E-05	0.000911899	0.000735061	2.51E-06	1.99E-05	0.000278529	0.000355146	9.02E-06	1.30E-05	7.99E-05	8.58E-05
GGACCATTTAGCGT	5.96E-07	1.04E-07	8.42E-06	1.02E-05	1.42E-06	3.51E-07	5.84E-06	6.44E-06	1.04E-06	3.71E-07	5.39E-06	8.59E-06
GGGGAGTACTCGTA	1.06E-06	6.13E-06	1.97E-06	1.96E-05	3.88E-07	1.11E-06	3.20E-05	1.90E-06	1.51E-06	2.00E-06	2.17E-05	3.95E-05
TGTCCAGGTGTCGT	2.18E-05	9.69E-06	1.09E-06	7.05E-06	6.92E-06	2.17E-06	2.77E-06	7.64E-06	1.55E-06	6.59E-06	2.78E-06	3.16E-07
TAACTCTTCGTCCG	4.24E-05	4.13E-05	0.000378739	0.000292474	8.20E-06	2.43E-05	0.000208836	0.000194237	8.00E-06	8.95E-06	9.58E-05	0.000128759
CGACAAGAGGGGTG	0.000390211	0.000429106	1.09E-06	1.10E-06	0.000288073	0.000223764	1.04E-06	1.04E-06	0.000164429	0.000211778	1.04E-06	1.04E-06
CGTGGTATTTCTGG	1.06E-06	1.73E-06	0.000125454	8.04E-05	1.03E-06	1.82E-06	4.43E-05	5.69E-05	2.95E-06	5.68E-07	3.50E-05	3.63E-05
TATAACTATTCCGA	0.003844139	0.00357669	0.000842234	0.000955204	0.003074566	0.003198317	0.001075471	0.001205155	0.001811656	0.001827791	0.001086355	0.001018114
TTCCCAGAGGTCGA	4.74E-06	9.77E-07	0.000144361	0.000155436	1.26E-06	1.03E-06	6.66E-05	5.66E-05	1.02E-06	1.02E-06	3.25E-05	4.36E-05
TTTGGGGGGCGGCG	3.82E-06	2.51E-05	7.24E-05	0.000157899	1.70E-05	1.25E-05	0.000128093	3.09E-05	1.24E-05	2.78E-05	8.05E-05	7.80E-05
ACTTGTTTTATTTG	5.06E-05	2.96E-05	0.000494847	0.000402356	1.59E-05	3.74E-06	0.000302323	0.000304045	1.40E-05	1.49E-05	0.000268834	0.000268624
CTAGGAGTACGTGT	5.79E-06	1.07E-06	0.000437238	0.000339394	1.03E-06	6.53E-06	0.000259802	0.000184535	1.37E-05	9.70E-06	0.000148498	0.000139022
GCGAGATCGATGGT	4.83E-05	3.44E-05	0.000287523	0.000293776	4.27E-06	1.47E-05	0.000207085	0.000298609	2.90E-05	3.69E-05	0.000160335	0.000133533
CAAAGGCTCCCAGA	0.000110328	9.83E-05	4.70E-05	5.57E-05	0.000110673	9.82E-05	4.62E-05	4.77E-05	9.86E-05	0.000125544	6.38E-05	3.01E-05
ACCTACTTGGTAGG	2.43E-05	2.27E-05	8.55E-05	8.08E-05	1.54E-05	7.78E-06	6.50E-05	3.23E-05	1.14E-05	1.32E-05	5.56E-05	6.42E-05
AATACATGATAGGT	2.71E-05	2.27E-05	3.69E-06	5.64E-06	8.14E-06	1.29E-05	2.27E-07	5.54E-06	4.58E-06	2.70E-06	4.24E-06	9.57E-07
TCGCCAGGGGGTTG	0.000488129	0.000388836	1.37E-05	1.10E-06	0.000251482	0.000288153	1.92E-05	5.12E-06	0.00017852	0.00018796	1.85E-05	5.17E-06
TCCGATAAATCCTT	1.59E-06	2.33E-06	4.87E-05	4.32E-05	1.78E-07	6.35E-06	2.57E-05	1.77E-05	2.42E-06	1.02E-06	2.69E-05	1.89E-05
TCTTTTGAGTCTCC	0.000304199	0.000336818	0.000173409	0.000277572	0.000255704	0.000303382	0.000250716	0.000238666	0.000145963	0.00018476	0.000250175	0.000247771
GAATCTGGTTTGAA	6.07E-06	1.07E-06	5.31E-05	6.95E-05	1.23E-06	5.31E-06	3.95E-05	4.16E-05	1.29E-06	5.01E-06	3.68E-05	3.70E-05
TTCAGGTACTAGGA	1.87E-05	1.97E-05	6.69E-06	6.68E-06	7.16E-06	3.98E-06	5.97E-06	6.32E-06	4.33E-06	3.75E-06	3.17E-07	7.72E-07
ACTTGTGGCAGTCA	2.25E-05	1.84E-05	1.09E-06	1.10E-06	1.11E-05	8.16E-06	1.70E-07	1.72E-07	4.95E-06	8.81E-06	2.42E-07	1.93E-06
CAACTTGGATCTAC	0.001085852	0.001029745	0.000115251	0.000142058	0.000949135	0.000884265	0.000121484	0.000167128	0.000852653	0.000683742	0.000174609	0.000146102
TGGAGAGTCTCCGA	0.019301376	0.019518165	0.002673228	0.002928532	0.020588289	0.020504706	0.004026961	0.004531517	0.022710748	0.021783874	0.005971056	0.006062353
TCAAGCGTAGGGGT	1.06E-06	1.39E-06	1.46E-05	1.20E-05	1.86E-06	3.09E-06	7.67E-06	1.03E-05	5.12E-07	5.11E-07	3.36E-06	2.62E-06
GGTATCGGGAGCAG	1.06E-06	2.18E-07	8.60E-05	7.62E-05	1.62E-06	2.42E-06	2.39E-05	3.97E-05	4.43E-06	2.90E-06	1.87E-05	1.34E-05
AGGCTCAATGTACG	4.13E-07	7.43E-06	4.26E-05	1.89E-05	5.28E-07	4.70E-06	7.41E-06	7.04E-06	6.68E-07	4.77E-07	4.92E-06	2.97E-06
TCTACCTATGAAAA	3.95E-06	1.75E-07	2.18E-05	2.53E-05	4.64E-07	9.76E-08	1.59E-05	1.45E-05	2.88E-06	4.30E-07	5.49E-06	5.05E-06
AGGCCAGCAGTGAT	1.04E-06	6.59E-08	6.50E-06	5.44E-06	4.16E-07	4.16E-07	2.54E-06	6.78E-06	5.68E-07	5.67E-07	1.19E-06	1.57E-06
ACTGGTCTCTCTCT	4.83E-05	5.89E-05	4.54E-05	6.96E-05	1.82E-05	2.37E-05	3.87E-05	4.99E-05	2.81E-07	1.40E-06	1.08E-05	8.41E-06
ATTTAGTAGTCTTA	4.77E-05	6.71E-05	9.23E-06	1.30E-05	3.52E-05	2.88E-05	7.39E-06	1.18E-05	2.71E-05	2.14E-05	1.14E-05	3.22E-06
ATCTTTGAAGACCT	3.66E-05	1.77E-05	5.77E-05	4.72E-05	8.88E-06	1.50E-06	2.20E-05	2.38E-05	7.52E-06	4.39E-06	1.70E-05	1.30E-05
AATCAGTGGGTTTC	0.000393425	0.000388733	3.30E-05	4.45E-05	0.000307142	0.00031834	5.09E-05	4.70E-05	0.000185267	0.000240353	6.87E-05	4.69E-05
AAATGTGGGCACTG	0.001018757	0.000966565	7.56E-05	7.82E-05	0.000794547	0.000936552	7.48E-05	8.96E-05	0.000614647	0.000564121	7.54E-05	9.50E-05
GCTATTGACCATAT	1.08E-05	5.10E-06	6.79E-05	3.13E-05	1.03E-06	1.95E-06	1.27E-05	2.78E-05	6.01E-06	3.47E-07	5.69E-06	9.58E-06
GTTATCACGTTGTG	0.001210716	0.001169737	1.09E-06	0.000183082	0.000990202	0.000946127	0.00016954	0.000145024	0.000747621	0.000674587	0.000168522	0.000174859
CCACATACGGCGAG	0.000338328	0.000390017	0.00189531	0.001941667	0.000389155	0.000323244	0.002101789	0.001599735	0.000440551	0.000498719	0.001377512	0.001528961
TTGTTGATTCAGTC	1.13E-05	2.75E-05	6.52E-05	4.70E-05	8.41E-06	5.03E-06	6.10E-05	5.77E-05	5.21E-06	2.25E-06	5.07E-06	1.03E-05
TGCCTTTTATCGCG	1.22E-06	1.13E-06	5.89E-05	6.75E-05	1.03E-06	1.03E-06	3.35E-05	2.43E-05	2.13E-06	7.67E-07	2.14E-05	2.26E-05
GGAATAGGATAGGG	0.000189237	0.000148954	4.67E-05	4.02E-05	9.15E-05	0.00010541	2.22E-05	3.46E-05	3.24E-05	2.73E-05	6.67E-06	6.24E-06
ATAATGGCTATGGG	5.41E-06	1.66E-05	5.24E-05	3.77E-05	1.39E-05	1.11E-05	3.25E-05	2.26E-05	7.01E-06	7.78E-06	1.30E-05	1.88E-05
TCCACGCGTCCAAA	3.32E-05	8.77E-06	0.000271324	0.000288116	9.60E-06	1.03E-06	0.000214244	0.000237599	1.08E-05	1.46E-05	0.000123682	0.000134436
GCTTAATCCTAACG	0.000110837	0.000104653	1.09E-06	2.92E-05	5.10E-05	3.45E-05	2.32E-05	7.59E-06	5.11E-05	3.22E-05	4.80E-06	2.06E-06
TGGTGATTCATCGG	1.05E-05	1.07E-06	3.40E-05	2.39E-05	1.03E-06	1.83E-06	2.20E-05	2.88E-05	3.40E-07	3.38E-07	8.53E-06	7.37E-06
CAGTGCGAAGAGTG	6.54E-05	5.92E-05	1.09E-06	0.000491516	8.19E-06	2.00E-05	0.000584334	0.000547095	3.17E-05	4.42E-05	0.000454792	0.000444232
CTGTATGCAGGCCT	4.08E-05	5.40E-05	1.09E-05	5.16E-06	1.66E-05	2.30E-05	4.66E-06	1.04E-06	1.32E-05	1.04E-05	1.01E-06	7.07E-06
GTGGTTTTTAGATC	1.51E-07	1.64E-07	5.88E-06	1.08E-05	8.20E-07	5.00E-07	3.89E-06	1.60E-06	3.49E-06	4.01E-07	7.17E-06	5.04E-06
CTGCAGTACGCCAG	2.43E-07	9.05E-06	3.15E-05	3.53E-05	6.50E-06	3.98E-06	3.00E-05	1.70E-05	7.94E-06	1.77E-07	1.16E-05	1.34E-05
TTAGTGATTCTGGC	8.63E-05	5.52E-05	7.88E-05	9.19E-05	5.69E-05	6.42E-05	8.48E-05	6.31E-05	4.34E-05	6.03E-05	3.76E-05	6.44E-05
GTCCTATTTGCCTG	0.000935137	0.000922217	5.50E-05	1.06E-06	0.000584902	0.000544131	1.21E-05	1.54E-05	0.000374868	0.000395232	1.55E-05	2.45E-05
GTGCTTTGCTTTGA	0.010090847	0.00965183	0.000360473	0.000256233	0.010505056	0.010202263	0.000300702	0.000362497	0.010921972	0.010273156	0.000611986	0.000627958
GGGGCGAGGGCGCG	7.60E-07	4.85E-06	3.23E-07	5.34E-06	2.74E-06	6.96E-07	6.42E-06	1.57E-06	4.99E-07	4.97E-07	1.31E-06	5.44E-06
GGGTCCTTGGGTCA	2.74E-06	1.07E-06	1.14E-05	1.43E-05	4.31E-07	1.45E-06	7.97E-06	6.18E-07	5.67E-07	5.66E-07	1.43E-06	1.39E-06
GTCGGATAAGACAG	0.007863323	0.008965592	0.000139116	0.00024839	0.010024264	0.009286813	0.000303416	0.000243849	0.010159587	0.009290415	0.000541166	0.000610779
ACGACGCCAGCAAC	9.01E-05	6.63E-05	1.73E-05	2.23E-05	2.77E-05	3.81E-05	2.28E-05	9.14E-06	3.99E-05	2.75E-05	1.22E-05	9.12E-06
ACGAGCTGGCTAGA	0.000395071	0.000368404	0.000264905	0.000188928	0.000296348	0.000115983	0.000485378	0.000189354	7.25E-05	0.000184176	0.000131467	0.000377127
TTGAGTACTAGGAG	7.05E-06	8.23E-06	3.35E-05	2.00E-05	3.27E-08	1.81E-06	1.23E-05	1.45E-05	4.62E-07	4.61E-07	5.52E-06	3.33E-06
TCTTCCTCGGACAC	4.55E-05	6.34E-05	1.06E-05	2.15E-05	3.77E-05	3.55E-05	1.31E-05	9.05E-06	1.24E-05	1.10E-05	9.56E-06	6.89E-06
ATGTAGACCTTTTC	1.73E-05	8.67E-06	2.21E-05	2.77E-05	7.75E-06	5.48E-06	9.76E-06	1.86E-05	3.79E-07	3.78E-07	9.25E-06	4.38E-06
GTTGCAAGACGGGG	0.007914062	0.007046536	0.001802856	0.000992564	0.008811395	0.00733019	0.001779037	0.002011678	0.00722041	0.008952226	0.002381501	0.002640999
AGTGTAAGGAGGCA	0.000192507	1.07E-06	0.000853011	0.000903672	6.56E-05	3.34E-05	0.000682646	0.000683938	7.37E-05	0.000102664	0.000437929	0.000467874
GCGCCCTGGTTTCA	0.005508535	0.005136464	0.000532212	0.000361898	0.004934279	0.005139954	0.000381149	0.000521504	0.005253773	0.004707355	0.000633966	0.000604896
TTTTGACTCGCAGT	2.03E-06	1.07E-06	2.46E-05	2.36E-05	3.83E-06	8.45E-09	2.05E-05	2.39E-05	1.02E-06	1.38E-06	1.37E-05	2.25E-05
CGTAAAAATCGCCT	5.13E-06	4.18E-07	2.43E-05	8.04E-06	5.45E-07	3.65E-08	8.91E-06	1.78E-05	3.68E-07	1.29E-06	3.70E-06	1.05E-05
CCAGGTTCATCCTC	4.05E-05	2.69E-05	0.00012055	0.000115089	2.01E-05	6.47E-06	8.09E-05	9.63E-05	1.51E-05	1.48E-05	5.46E-05	4.81E-05
TTTTTAGGGTGTCG	0.000940157	0.000906191	0.000216708	0.000161041	0.00075342	0.000843773	9.68E-05	0.000109773	0.000808436	0.000707502	0.00015369	0.000163257
ACGATAGGCAGCGT	0.005707047	0.007608035	0.000431104	0.00053036	0.007644813	0.008533666	0.000852127	0.000591571	0.00973225	0.009565336	0.001146866	0.001344311
AGCAAGCTTTTTTG	0.000639708	0.000496604	0.001480679	0.001068916	0.000581616	0.000565517	0.001081996	0.001054186	0.000457932	0.000429929	0.001089224	0.001032649
TCATGTTCGAGGGC	0.000152027	8.38E-05	0.000121671	0.000166599	7.49E-05	6.88E-05	0.000122589	0.000160777	0.000118618	7.16E-05	9.44E-05	9.98E-05
GTAAATACTGTTTT	5.81E-05	6.64E-05	0.000148976	9.84E-05	2.52E-05	3.03E-05	6.58E-05	0.000111828	2.88E-05	3.94E-05	6.66E-05	5.46E-05
TCCATATTGGCGTT	0.000186972	0.000195743	4.60E-07	5.97E-06	8.46E-05	0.000100097	1.04E-06	1.43E-06	4.74E-05	3.28E-05	5.08E-06	1.04E-06
ATGATACGGTGAGG	0.000164142	0.000157543	5.10E-05	5.16E-05	0.000107214	0.000103683	2.91E-05	4.64E-05	7.17E-05	3.91E-05	2.57E-05	3.25E-05
GTTAGCCCGATTGC	1.05E-05	3.54E-06	7.67E-05	0.000113853	2.58E-07	9.41E-06	4.21E-05	7.07E-05	1.25E-06	9.67E-07	2.91E-05	1.93E-05
TGCTATTACGAATT	0.001239536	0.001479552	0.000360327	0.000391948	0.001411776	0.001465186	0.000398981	0.000466322	0.001471617	0.001380807	0.000577911	0.000531441
TCGTTTAAGTGTTG	8.39E-05	6.59E-05	0.000176832	0.000134943	7.39E-05	5.23E-05	0.000110332	0.000138042	6.47E-05	7.99E-05	9.19E-05	8.38E-05
TTATTTCGAAGATA	0.000102757	0.000132666	0.000187753	0.000198543	4.28E-05	4.04E-05	0.000138642	0.000114005	1.01E-05	3.78E-05	4.23E-05	5.17E-05
GGGAGGCGGGCTGT	1.06E-06	1.07E-06	1.12E-05	1.54E-05	3.16E-07	3.17E-07	6.45E-06	7.43E-06	5.46E-07	5.44E-07	1.43E-06	2.62E-06
GCGTGGGGTGGGGG	1.06E-06	1.07E-06	0.000257278	0.000527409	1.03E-06	1.03E-06	0.000590965	0.000108119	0.000156949	1.02E-06	0.000506874	0.000493986
GTTCGTGCTTTCAT	1.47E-05	1.54E-05	0.000250448	0.00021267	9.65E-06	7.04E-06	0.00017351	0.000172465	1.87E-05	1.07E-05	0.000121951	0.000116805
TGAACGTCATTAGA	0.000697954	0.000525225	0.000479575	0.000483446	0.000417558	0.00044124	0.000330061	0.000415191	0.000307528	0.000254478	0.000233057	0.000211326
TTTACCGTTGGCTG	1.53E-06	1.27E-06	1.86E-05	1.53E-05	7.89E-07	5.30E-06	6.47E-06	3.43E-07	4.97E-07	4.96E-07	2.99E-06	3.85E-06
TTTGCGCTGGACTG	1.03E-05	1.47E-05	3.74E-05	0.000173923	5.45E-06	1.03E-06	0.000144186	0.000161985	5.56E-06	2.66E-06	0.000135718	9.99E-05
TTATTACCCGCATT	3.97E-06	5.72E-06	6.50E-05	7.15E-05	1.55E-06	3.95E-06	4.91E-05	6.95E-05	3.85E-06	7.77E-07	3.63E-05	3.88E-05
ACATCACGTGGCAT	0.000216616	0.000230468	1.41E-06	3.88E-07	0.000161185	0.000148666	2.17E-06	8.50E-06	8.14E-05	7.81E-05	1.28E-05	9.31E-06
TTCTCATGTAGTTT	1.50E-05	1.13E-05	0.000395613	0.000313258	1.15E-05	2.38E-06	0.000225079	0.000329081	2.85E-05	1.87E-05	0.000172947	0.00019776
AGATCGATTGGTCT	4.90E-05	2.21E-05	1.09E-06	0.000366904	1.08E-05	6.81E-06	0.000200001	0.00022615	9.25E-06	2.64E-06	0.000125186	0.000129691
GAGGTTTCGAAAGA	0.000610788	0.00063199	3.84E-05	3.91E-05	0.000496886	0.000550886	2.09E-05	4.40E-05	0.000263988	0.000242461	3.21E-05	2.81E-05
TGATACCGATCTGA	3.87E-05	4.50E-05	1.89E-05	1.08E-05	3.14E-05	1.94E-05	7.91E-06	1.10E-05	9.05E-06	9.04E-06	9.87E-06	6.26E-06
AGTGAGAGCATAAC	0.000213894	0.000162051	0.000223185	0.000326286	8.33E-05	0.000109114	0.000278801	0.000391717	7.03E-05	8.47E-05	0.000292556	0.000280131
AACATTTTACTGAG	0.010432476	0.009060726	0.005653244	0.004241935	0.010597962	0.010796238	0.00578857	0.006638812	0.013464684	0.013378167	0.007208099	0.007051452
GGGATTCGCGTTCA	0.000149271	0.000129094	4.96E-05	3.87E-05	8.44E-05	0.000111797	3.73E-05	3.17E-05	6.17E-05	8.90E-05	2.62E-05	1.70E-05
TACCCTCCTCACTC	5.71E-05	7.84E-05	7.85E-05	9.51E-05	3.25E-05	2.57E-05	6.86E-05	5.81E-05	1.54E-05	4.82E-06	2.37E-05	1.75E-05
TAACTCATGAAAAC	1.99E-06	5.15E-07	6.15E-06	5.69E-06	4.98E-07	8.60E-07	3.30E-06	2.25E-06	5.75E-07	5.74E-07	1.67E-06	6.87E-07
GTCAAAAGGCTTGA	5.10E-05	5.36E-05	4.71E-06	3.03E-06	3.01E-05	2.46E-05	1.04E-06	3.80E-06	5.29E-06	4.03E-06	3.01E-07	9.32E-07
GGTTAGACACGTTT	0.008965705	0.008023623	0.00352109	0.00435202	0.009931872	0.010216064	0.005479481	0.005479687	0.010606625	0.009689911	0.005473672	0.006016998
GTTGGGGAGGTGGC	0.000350964	0.00031786	0.000958033	0.001334162	0.000237637	0.00029406	0.00131193	0.001270285	0.000320808	0.000228164	0.001087529	0.001102341
TATTGCCGCTTAGG	0.000171619	0.000147116	0.001375146	0.001018582	0.000103758	9.37E-05	0.000846378	0.000885738	0.000168287	0.000143771	0.000773949	0.00073699
TCGAGTTTGGGAAA	1.06E-06	1.07E-06	1.00E-05	1.35E-05	3.18E-07	3.18E-07	7.05E-06	6.78E-06	1.36E-06	5.21E-07	3.83E-06	1.56E-06
CTGGCGAAGGGACA	4.71E-07	2.56E-06	2.47E-05	3.53E-05	1.84E-06	1.03E-06	3.21E-05	4.17E-06	1.24E-06	6.92E-07	9.48E-06	1.17E-05
AGGTGCGACATTCA	5.72E-06	1.07E-06	0.000113695	0.000102607	1.03E-06	1.22E-06	7.02E-05	6.86E-05	3.99E-06	1.02E-06	5.30E-05	3.21E-05
TGCAACTAATCTTG	0.001204178	0.00113986	0.002232083	0.001992274	0.001233191	0.001124952	0.002070259	0.002134434	0.001147942	0.001016766	0.001964641	0.00203811
TTCCTGCGATTTTC	0.006179974	0.006404508	0.00021152	0.000364757	0.006840927	0.006718761	0.000369528	0.000400462	0.00463129	0.004243581	0.000735071	0.00062394
AAAAATTCGTACAA	5.85E-06	1.07E-06	1.74E-05	7.11E-06	7.12E-07	3.92E-07	9.17E-06	1.27E-06	7.28E-08	1.05E-07	5.89E-06	8.43E-06
ATCTATATACCCAA	2.31E-06	4.26E-06	8.66E-06	1.52E-05	6.74E-06	1.14E-07	1.21E-05	1.09E-05	5.28E-07	5.26E-07	2.99E-06	2.09E-06
TCCTATCACCAACT	8.87E-06	1.07E-06	7.14E-05	8.24E-05	3.60E-06	5.50E-07	3.10E-05	5.85E-05	3.81E-06	1.02E-06	2.57E-05	1.42E-05
TGAAGCTGGGTGAA	4.46E-06	1.07E-06	6.59E-05	4.77E-05	5.02E-06	2.95E-07	4.44E-05	6.17E-05	3.27E-06	1.78E-07	1.17E-05	1.33E-05
CGTTTTATCGAAAT	3.81E-05	5.59E-05	3.58E-08	2.65E-06	4.24E-05	2.33E-05	1.17E-06	2.69E-06	1.16E-05	1.47E-05	7.72E-08	7.80E-08
AATTGGCCTTTATC	0.000233669	0.000204899	2.76E-05	6.46E-05	0.000170585	0.000163551	4.25E-05	4.99E-05	0.000119765	0.000115439	7.03E-05	5.68E-05
GGTCCTTATCTAGT	3.83E-06	6.40E-06	2.06E-07	5.60E-06	3.41E-06	1.14E-06	7.17E-06	3.63E-07	8.02E-06	6.78E-06	5.26E-07	8.59E-07
CGTAACTGCCATGG	6.26E-06	4.10E-06	6.99E-06	4.17E-06	4.49E-06	1.82E-06	9.37E-07	3.44E-07	5.62E-07	1.68E-06	1.17E-06	1.90E-06
ATGTATATATGGCC	0.00023759	0.000191779	0.000179978	0.000276258	0.000106184	9.95E-05	0.00014762	0.000160263	6.95E-05	6.85E-05	9.82E-05	7.69E-05
GTGTAACTCCTAAA	0.001058142	0.001084375	0.000259229	0.000259458	0.000908981	0.000622747	0.000268934	0.000361957	0.000660984	0.000765238	0.000296953	0.000276879
TTGACTGATTTACC	0.000115735	0.000124752	0.00020348	0.000259145	6.97E-05	7.57E-05	0.000176315	0.000160076	3.30E-05	3.48E-05	8.06E-05	0.000114032
TCCAGATATGGGCC	3.30E-05	2.10E-05	0.000319776	0.00042569	1.03E-06	1.28E-06	0.000297387	0.000327287	1.31E-05	5.44E-06	0.000140629	0.000115885
TTAAACATCTGGGT	1.00E-05	3.41E-07	7.75E-05	6.95E-05	5.40E-07	1.01E-05	3.51E-05	4.32E-05	8.88E-06	8.65E-06	3.27E-05	4.88E-05
ATAGTGCGCCGCCT	5.16E-05	4.06E-05	0.000862827	0.000716589	1.86E-07	1.11E-05	0.000679809	0.000546939	3.48E-05	5.69E-05	0.000438231	0.000410279
AGGGGGGGGGGCGC	1.06E-06	1.07E-06	4.90E-05	0.000241597	6.62E-07	2.58E-07	0.000149061	1.87E-05	8.38E-06	9.21E-06	8.26E-05	1.55E-07
TTGGCTATTGTGGG	1.01E-06	8.51E-07	3.65E-05	1.40E-05	2.34E-07	2.35E-07	2.11E-06	1.55E-05	5.25E-07	5.24E-07	3.84E-06	1.39E-06
ACATTTAGTTGGGT	0.000238177	0.00023948	0.000192734	0.000122148	0.000165429	0.000185474	0.000139818	0.000166427	9.32E-05	0.000132393	0.0001527	0.000110508
AGTTAGGGGCTTGA	0.009022581	0.007653019	0.005236307	0.004305925	0.009180524	0.009751923	0.006393191	0.007246477	0.011026372	0.010183113	0.007844588	0.007397136
GTGCTGGGTCTCGC	0.000101993	6.36E-05	7.56E-05	0.000120911	2.72E-05	4.20E-05	5.51E-05	5.66E-05	1.88E-05	1.40E-05	2.98E-05	1.59E-05
CTGGGCTGTTGTCT	1.34E-06	8.69E-06	1.18E-05	2.04E-05	1.28E-05	9.86E-06	1.01E-05	2.28E-06	3.32E-06	3.36E-06	3.04E-06	6.14E-07
AGCCGGGTGCCGCG	0.000464011	0.000437956	7.01E-05	6.83E-05	0.000341285	0.000319875	6.13E-05	4.52E-05	0.000209116	0.000160148	5.05E-05	4.75E-05
ATCAGTGTGTCAGG	5.84E-08	7.14E-08	1.21E-05	7.54E-06	3.79E-07	3.79E-07	7.47E-06	3.54E-06	4.32E-07	4.31E-07	6.00E-06	4.56E-06
TTGCTTATGACACC	1.28E-05	1.39E-05	1.00E-06	4.24E-06	1.49E-05	1.09E-05	1.53E-06	8.48E-08	1.48E-05	1.25E-05	5.90E-06	1.04E-06
ATGTTCTAATATGT	2.97E-05	2.60E-05	3.75E-05	4.66E-05	1.15E-05	9.23E-06	1.92E-05	3.21E-05	2.95E-06	1.21E-05	4.73E-06	1.03E-05
AGTCGCTGTCGGCC	3.33E-06	8.79E-07	5.70E-06	8.67E-06	1.92E-06	2.81E-07	6.77E-06	8.70E-06	5.19E-07	1.44E-06	3.82E-06	1.73E-06
GACGAGTATCATCA	5.22E-06	2.00E-05	0.000139814	0.00015127	1.61E-05	1.95E-06	0.000166853	0.000182482	1.25E-06	8.98E-06	0.000141816	0.000128475
GGACCAAATCGAAC	5.68E-05	7.89E-05	1.34E-05	9.42E-06	3.20E-05	4.66E-05	1.66E-05	8.98E-06	3.61E-05	3.44E-05	1.15E-05	4.34E-06
GTGGAGTGTCGGGG	9.04E-06	7.77E-07	0.000364501	0.000226132	1.09E-05	1.80E-05	0.000162534	0.000195283	1.71E-05	1.23E-05	0.00015035	0.000124527
CTATCATGGGGGAC	3.85E-06	1.52E-05	2.36E-06	2.49E-05	1.67E-05	7.19E-06	1.70E-05	2.59E-06	4.34E-06	1.22E-05	1.24E-05	1.52E-05
GTCAAGGACGGGAG	5.49E-05	8.04E-05	4.95E-05	3.51E-05	3.89E-05	2.06E-05	2.12E-05	4.06E-05	1.86E-05	6.87E-06	7.60E-06	1.51E-05
CATCTATGGTTGGC	1.06E-06	1.07E-06	0.000302705	0.000320123	1.03E-06	1.03E-06	0.000261564	0.000281655	1.02E-06	4.51E-05	0.000217831	0.000200844
GGTGGTGGCGCTGG	4.44E-05	6.32E-05	0.000198169	0.000122367	2.24E-05	4.38E-05	5.90E-05	8.19E-05	1.60E-05	2.66E-05	1.84E-05	1.16E-05
CGAAACACCCAGTC	1.06E-06	8.80E-07	1.30E-05	1.56E-05	2.16E-06	4.32E-07	4.05E-06	4.49E-06	5.47E-07	5.45E-07	8.27E-07	3.15E-06
GGTCGGCAGAGTCC	0.000147408	0.000187904	7.49E-05	9.96E-05	7.01E-05	0.00010098	6.47E-05	7.57E-05	6.77E-05	6.15E-05	4.05E-05	3.68E-05
GTTTTGCTGGGTGG	0.000404655	0.000348447	1.09E-06	1.10E-06	0.000277368	0.000285029	1.04E-06	0.000103842	0.000183344	0.000176938	7.45E-05	4.23E-05
GGCTGTGATTAGTT	1.68E-06	2.98E-06	1.06E-05	1.85E-05	5.03E-07	3.26E-06	7.98E-07	4.48E-06	5.83E-07	5.82E-07	1.19E-06	6.87E-07
GCAGCGCGCAACGC	4.93E-08	1.29E-06	2.70E-05	2.39E-05	6.45E-07	1.03E-06	1.72E-05	1.36E-05	3.24E-07	1.20E-06	1.19E-05	4.90E-06
GCCCCTATCTTCTC	6.61E-05	9.02E-05	0.00034002	0.000580789	6.05E-05	4.47E-05	0.000367219	0.000240097	4.47E-05	4.68E-05	0.000207124	0.000241458
TGGTAAGTTCTTCT	1.22E-06	1.16E-07	7.19E-05	5.46E-05	3.19E-06	1.03E-06	2.74E-05	2.91E-05	6.95E-07	1.02E-06	1.20E-05	1.28E-05
AGGTGCGTCGTACC	3.93E-06	5.13E-06	3.90E-05	3.85E-05	1.03E-06	5.51E-06	2.71E-05	2.52E-05	1.39E-05	1.12E-05	1.96E-05	1.62E-05
TGTTATCCGTACGA	8.74E-06	3.70E-06	5.86E-05	3.91E-05	8.95E-07	4.35E-07	7.89E-06	7.10E-06	5.27E-07	5.26E-07	1.43E-06	3.68E-06
CGCGGCTAGTCTAG	5.58E-07	2.81E-05	0.000464347	0.00074008	2.75E-05	2.65E-05	0.000608458	0.000298234	6.00E-05	3.98E-05	0.000613727	0.000636328
ATGTATTAGCTTGT	3.07E-05	1.35E-06	0.000216676	0.00020379	2.46E-06	3.43E-06	0.000113796	0.000148052	5.58E-06	1.19E-05	8.79E-05	9.99E-05
GTCGGCGGGCCAAG	5.06E-05	7.58E-05	6.51E-05	5.17E-05	2.67E-05	5.93E-05	5.84E-05	6.13E-05	1.71E-05	2.10E-05	2.99E-05	4.41E-05
TCGTAAATTTCAGT	1.06E-06	2.30E-06	4.92E-05	5.77E-05	1.31E-06	3.10E-07	2.67E-05	3.39E-05	1.02E-06	1.74E-06	2.26E-05	2.90E-05
TTACTGATATGTCA	0.000110772	7.57E-05	6.47E-05	8.52E-05	5.29E-05	6.43E-05	4.04E-05	5.34E-05	4.19E-05	3.14E-05	4.10E-05	4.03E-05
GCGCCGCCATGGGA	1.81E-08	3.07E-08	1.55E-05	5.45E-06	3.78E-07	3.78E-07	6.88E-06	4.19E-06	5.53E-07	5.52E-07	2.03E-06	1.57E-06
TTAAGCCACCCTTT	7.86E-05	7.46E-05	4.21E-06	5.03E-06	3.20E-05	4.96E-05	4.27E-06	8.62E-06	1.73E-05	6.02E-06	1.86E-06	4.26E-06
TTGATTAGTCGTCA	2.60E-05	1.80E-05	0.00031697	0.00029083	1.60E-06	9.19E-06	0.000217712	0.000199374	1.99E-05	1.40E-05	0.000164366	0.000137646
GCAAACAAATGCTA	0.000174128	0.000161701	0.000819371	0.000939668	0.000111612	9.10E-05	0.000892365	0.000953916	0.000111394	0.000143461	0.000776273	0.000729131
GTTAATCCGACGAG	3.53E-06	1.07E-06	7.54E-05	7.54E-05	3.28E-06	1.62E-06	4.88E-05	4.65E-05	1.69E-06	1.02E-06	2.30E-05	2.81E-05
TGTAGCCGCTCCAC	0.000119274	0.000283328	1.76E-05	6.22E-05	0.000156263	0.000181925	3.83E-05	1.17E-05	6.84E-05	7.44E-05	2.93E-05	2.32E-05
CTTCAGTAATATAC	1.48E-05	1.75E-05	5.38E-05	9.12E-05	3.06E-06	1.03E-06	0.000107962	5.75E-05	2.05E-06	2.22E-06	8.25E-05	6.78E-05
GAGGCGCTGGGGGG	1.06E-06	0.000172337	0.000893915	0.001632077	0.000113453	8.39E-05	0.002197452	0.000369829	0.000117556	0.000187646	0.001152074	0.001738009
CGGCATGGTGCGGC	5.70E-05	5.93E-05	1.63E-05	4.02E-05	4.30E-05	4.14E-05	1.37E-05	1.21E-05	1.94E-05	2.19E-05	1.24E-05	1.16E-05
GCTAGCGTGCTGAG	1.06E-05	2.70E-06	3.03E-05	2.48E-05	3.72E-06	7.60E-06	1.86E-05	1.76E-05	6.08E-06	1.02E-06	3.12E-05	7.99E-06
TGATAACAAGCATT	3.14E-05	1.07E-06	0.000410498	0.000467777	1.03E-06	6.42E-06	0.000312914	0.000350875	2.71E-05	1.64E-05	0.000290194	0.000240646
TTGATATGCTGAAA	7.08E-06	1.03E-05	2.59E-05	1.90E-05	7.44E-06	2.23E-06	4.46E-06	7.96E-06	4.94E-07	4.92E-07	1.07E-06	5.96E-06
CTATACCAGCGCCT	1.06E-06	6.66E-07	1.06E-05	7.15E-06	5.60E-07	5.60E-07	1.77E-06	9.55E-07	4.95E-07	4.93E-07	5.76E-06	1.21E-06
CAACAGTGCGCACG	0.000146165	0.000123752	0.000202206	0.000142374	5.80E-05	7.03E-05	0.000100719	9.76E-05	2.97E-05	1.47E-05	3.84E-05	2.30E-05
CGAAATGTAGCGCT	2.37E-06	1.07E-06	3.19E-05	2.04E-05	1.03E-06	4.34E-06	2.07E-05	2.03E-05	4.18E-07	4.17E-07	1.91E-06	9.48E-06
AAGAACGTCGGCAC	0.00035215	0.000416039	0.000564517	0.000837092	0.00033525	0.000300165	0.000823719	0.000743386	0.000371955	0.000360986	0.000561664	0.000674048
CTGTGTGATTAGAT	4.49E-05	1.56E-05	1.41E-06	1.36E-05	1.41E-05	4.26E-06	5.02E-06	9.14E-06	4.39E-07	4.38E-07	6.12E-06	4.03E-06
GAGTGCCGGTCGTG	0.00021742	0.000202543	0.000200866	0.000279676	0.000139126	0.00012071	0.000149951	0.000177985	0.000127025	7.15E-05	5.14E-05	8.52E-05
GCTTCATTAGCACA	1.96E-06	1.07E-06	2.86E-05	2.18E-05	1.35E-06	1.82E-07	7.12E-06	1.29E-05	1.68E-06	5.25E-07	1.29E-06	3.84E-06
AGGTATCGAAAATA	6.82E-06	1.20E-05	5.65E-07	9.31E-10	2.62E-06	1.18E-06	3.75E-07	3.77E-07	1.58E-06	2.14E-06	3.75E-07	1.01E-06
ACCGTTAGAGTCAG	9.20E-06	9.25E-06	6.86E-05	4.40E-05	4.13E-06	4.40E-06	2.52E-05	2.25E-05	1.56E-06	2.81E-06	1.43E-05	7.14E-06
ATATGGGAGGTAAA	1.44E-05	1.29E-05	1.38E-06	6.68E-06	3.42E-06	3.97E-06	2.37E-06	3.28E-07	5.69E-07	5.67E-07	1.67E-06	1.04E-06
TTGGGGGAGGGGTC	4.25E-06	0.000161635	7.53E-05	0.000487817	0.000103409	6.33E-05	0.000535393	8.13E-05	6.46E-05	0.000114504	0.000453899	0.000467831
TCTTCTCGAATACA	0.00010752	0.000123627	6.36E-05	9.70E-05	2.38E-05	3.08E-05	2.72E-05	8.64E-06	1.52E-05	1.87E-05	4.73E-06	1.13E-06
GGTCGCCGGAAAAG	0.000673567	0.000902355	0.00015891	0.00015614	0.000934607	0.000904033	5.42E-05	3.35E-05	0.000747191	0.000629162	0.000187554	0.000144694
GTACACGCAGAGGT	0.000415712	0.000403528	4.54E-05	2.93E-05	0.000247347	0.000291456	3.08E-05	3.20E-05	0.000232545	0.000265277	4.73E-05	3.37E-05
TGCTGACCGCTTAT	1.37E-06	6.69E-06	2.09E-07	3.87E-05	1.15E-05	6.89E-06	1.78E-05	1.56E-05	4.66E-06	2.87E-07	6.67E-06	1.21E-05
CGTACCACGGGGTC	2.44E-06	6.62E-06	8.60E-06	1.87E-05	4.35E-07	5.78E-07	6.19E-06	2.25E-06	1.60E-06	4.46E-07	3.34E-06	6.30E-06
GTTGTACATAAAGT	0.000301969	0.000271101	0.000176905	0.000197914	0.00018132	0.000169998	0.000130144	0.000120803	0.000110129	9.61E-05	0.000101814	9.85E-05
GTATTGTCCATGAG	0.000432498	0.000387461	0.000367324	0.00024073	0.000275343	0.000368791	0.000253123	0.000299984	0.000348446	0.000334367	0.000266707	0.000248036
GTCTGGAGGAGTCA	7.49E-06	1.29E-05	1.09E-06	1.85E-06	9.48E-06	8.59E-06	6.10E-07	1.88E-07	5.78E-06	1.36E-06	3.30E-07	3.31E-07
GGCCCGTCCGCAAA	2.74E-06	1.09E-05	0.000253771	0.000289047	3.89E-06	3.55E-06	0.000315033	0.000225572	7.95E-06	7.59E-06	0.000274666	0.000267743
GGTCATAGGGTGCT	7.22E-06	8.76E-06	0.000143519	0.00012192	5.91E-06	1.03E-06	8.00E-05	8.44E-05	6.63E-06	1.02E-06	2.67E-05	4.58E-05
CTTAGCACTAGTGA	5.22E-06	4.02E-06	3.98E-05	2.68E-05	1.43E-06	1.44E-06	1.34E-05	2.03E-05	2.13E-07	1.09E-06	1.37E-05	9.47E-06
CCACTAGTGATAGG	9.59E-06	1.39E-05	2.04E-05	1.98E-05	1.03E-06	3.31E-06	1.62E-05	1.71E-05	4.57E-07	3.22E-06	6.33E-06	2.76E-06
GCTCTGCGGGTGAA	1.42E-05	1.16E-05	1.90E-05	2.40E-05	6.23E-06	5.24E-06	1.01E-05	1.44E-05	3.57E-07	5.64E-06	7.98E-06	6.77E-06
GTTGATCACACCCA	0.000943604	0.00089935	0.000201042	0.000135166	0.000842978	0.000748696	0.000150887	0.000169675	0.000615431	0.000633087	0.000169981	0.000157113
TTTTAGTCGCTTGT	0.001373413	0.001231357	7.68E-05	1.79E-05	0.000750823	0.00079297	2.60E-05	1.67E-05	0.000362577	0.000344069	2.99E-05	2.39E-05
ATCACCCCTCGGTA	1.06E-06	1.07E-06	1.62E-05	3.33E-05	2.23E-07	2.24E-07	1.59E-05	2.25E-06	5.02E-06	1.52E-06	4.00E-06	3.25E-06
CTTCACACTAATTT	0.001859034	0.002581976	0.004226738	0.004722544	0.002737367	0.002422732	0.004967497	0.003635733	0.00175909	0.001685172	0.003949531	0.004040965
GGGTGGTAAGCGGG	8.05E-05	7.52E-05	6.83E-05	5.78E-05	2.54E-05	2.37E-05	3.00E-05	1.52E-05	1.41E-05	1.47E-05	1.06E-05	9.46E-06
GTAGGCGAGCCTTT	1.03E-05	4.29E-06	0.000123919	8.16E-05	1.81E-06	3.18E-07	4.82E-05	6.69E-05	3.28E-06	1.02E-06	2.27E-05	2.91E-05
CACATACGCCCTTT	4.74E-06	1.51E-06	4.21E-05	4.74E-05	1.01E-06	2.79E-06	2.65E-05	3.03E-05	3.51E-07	3.50E-07	9.62E-06	5.61E-06
AACAAAGTAAATTA	0.000660317	0.000690189	7.89E-05	0.000112118	0.00062092	0.000467496	6.74E-05	7.45E-05	0.000407366	0.000488652	0.000111362	9.39E-05
TTCCCCGGAAGCGG	3.25E-05	2.19E-05	6.99E-05	5.38E-05	1.03E-06	1.33E-05	4.29E-05	3.31E-05	1.13E-05	3.04E-06	3.11E-05	1.98E-05
ACCAGGCCACCTCG	1.00E-05	1.07E-06	8.45E-05	5.51E-05	1.03E-06	4.46E-06	2.47E-05	2.58E-05	1.77E-06	2.90E-07	1.09E-05	7.70E-06
TGAAAGATGCGCTC	5.53E-06	2.09E-08	1.03E-05	1.69E-05	3.88E-07	3.88E-07	5.77E-06	4.84E-06	4.44E-07	1.17E-06	5.15E-06	4.72E-06
TTGGAGAACCGGAT	1.98E-06	1.24E-06	2.23E-05	1.24E-05	4.21E-07	4.21E-07	4.58E-06	4.52E-06	5.94E-07	5.92E-07	5.86E-07	6.87E-07
AATAATAGGGAGCA	0.000475068	0.000466379	6.70E-05	8.68E-05	0.000309135	0.000294889	6.33E-05	6.02E-05	0.000173419	0.000153954	3.95E-05	4.70E-05
ACTGTAGTGTTTGA	3.26E-05	2.06E-05	1.09E-06	4.58E-07	1.63E-05	9.39E-06	1.95E-06	1.92E-06	3.21E-06	2.86E-06	3.44E-07	3.45E-07
GTGGGGTCGCGTAC	1.47E-05	8.21E-06	0.000113489	0.000140786	1.03E-06	1.03E-06	0.000109052	0.00013076	4.83E-06	9.78E-06	0.000115408	0.000115597
AGCGGGGGTGGCTG	2.27E-05	2.78E-05	4.32E-05	3.83E-05	6.66E-06	5.27E-06	3.10E-05	1.70E-05	4.11E-06	1.65E-05	1.03E-05	1.22E-05
GGTATTGGTGGGGG	1.06E-06	2.95E-06	1.47E-05	2.26E-05	2.19E-07	1.03E-06	1.79E-05	2.25E-06	2.33E-07	1.87E-06	1.66E-05	7.00E-06
GCCTGCGGGTTCAT	6.58E-07	1.07E-06	8.74E-05	8.69E-05	1.03E-06	1.03E-06	7.01E-05	7.02E-05	2.07E-06	4.46E-06	5.75E-05	5.46E-05
TCCCTGCAGACCGG	9.85E-05	6.36E-05	0.000298891	0.000218628	2.69E-05	2.49E-05	0.000111569	0.000149708	1.75E-05	2.45E-05	4.85E-05	3.81E-05
GTGGCAAGTTTTTA	2.63E-05	1.07E-06	0.000208426	0.000217498	3.47E-06	1.03E-06	0.000134302	0.000185044	9.09E-06	6.83E-06	0.000121774	0.00010503
GTCCCCTAACTGTG	2.82E-05	1.77E-05	1.16E-06	2.43E-06	3.39E-06	1.29E-05	3.53E-06	2.10E-07	1.60E-06	1.48E-06	3.83E-07	3.11E-07
GCATTTCAGCTCCC	9.33E-07	5.30E-06	3.56E-05	4.71E-05	8.63E-07	3.15E-06	2.06E-05	3.46E-05	1.69E-07	2.28E-06	1.15E-05	6.47E-06
ACAGCCCGGGGGAG	1.08E-05	0.000116123	3.16E-05	9.94E-05	6.37E-05	3.90E-05	0.000117948	1.12E-05	4.29E-05	7.82E-05	9.74E-05	9.84E-05
GATGGGTGGGGCTG	0.001516277	0.001335521	0.003465375	0.002720878	0.001091851	0.001180205	0.002472402	0.002848497	0.001044494	0.001056707	0.002672962	0.002389317
CACCTAGTGATTCG	0.00128835	0.001176473	0.000751351	0.000665081	0.000938092	0.001009008	0.000575973	0.000628062	0.000900089	0.000873188	0.000495287	0.000517779
TATCACACGAGGCA	9.11E-06	7.36E-06	3.77E-05	2.56E-05	5.18E-06	1.03E-06	2.21E-05	1.19E-05	4.78E-06	1.79E-06	5.45E-06	6.59E-06
GGATCTATAAAATT	4.74E-06	1.07E-06	3.45E-05	4.77E-05	5.61E-09	5.75E-09	1.45E-05	1.36E-05	8.04E-08	7.90E-08	1.59E-05	1.49E-05
TGCTCTTGACCGTT	5.85E-05	4.74E-05	0.001112731	0.00107915	2.72E-05	5.64E-05	0.001230773	0.001166919	8.00E-05	6.99E-05	0.001055569	0.001193936
ACCCGCCCGTCGCT	0.000492409	0.00050984	6.67E-05	8.22E-05	0.000341342	0.000297243	6.94E-05	6.53E-05	0.000163989	0.000163301	4.21E-05	6.79E-05
CATCAGGCTTTATA	5.51E-05	5.15E-05	0.000212208	0.000287343	3.29E-05	3.08E-05	0.00021656	0.000239442	4.47E-05	5.80E-05	0.000171388	0.000166266
GCTTTTCCGATTAC	2.97E-05	2.09E-05	1.09E-06	1.47E-06	9.68E-06	1.01E-05	1.62E-07	1.65E-07	1.89E-05	7.93E-06	3.50E-06	1.40E-06
TTAGAGCCTCTCGG	0.001434108	0.001501809	6.89E-05	1.44E-05	0.001338315	0.001361866	5.84E-05	6.05E-05	0.000916215	0.000868263	7.82E-05	0.000109647
GTATGCTTGCTACC	2.21E-06	5.39E-07	1.76E-06	3.05E-06	5.80E-07	5.81E-07	8.34E-07	9.55E-07	5.06E-07	5.05E-07	7.06E-07	5.61E-06
GGCGCTCCTCATTC	8.17E-05	9.34E-05	1.34E-05	2.17E-05	2.76E-05	6.75E-05	1.85E-05	1.43E-05	2.17E-05	1.28E-05	1.00E-05	1.18E-05
GACTTGGACATAAA	0.00036274	0.000328307	0.000176519	0.00018758	0.000200001	0.000130952	0.000131937	0.000134663	7.80E-05	0.000108137	0.000124709	8.87E-05
GGTAATTCATAGTT	6.56E-05	7.63E-05	9.51E-06	1.24E-05	5.90E-05	4.77E-05	8.36E-06	6.67E-06	2.72E-05	4.75E-06	1.98E-06	4.67E-06
TGACTTGTGTGACG	4.48E-05	4.06E-05	2.80E-05	2.77E-05	1.36E-05	1.62E-05	2.55E-05	2.42E-05	8.57E-06	2.86E-06	1.25E-05	1.30E-05
AGAGTTATTGCTGA	0.000455543	0.000356414	0.000908382	0.000958547	0.000281547	0.000302041	0.000690272	0.00077748	0.000264321	0.000267416	0.000539364	0.000509894
CCTTTCTAGCGTGG	2.28E-05	2.05E-05	0.000104554	7.20E-05	9.56E-06	3.64E-06	3.19E-05	5.58E-05	5.36E-06	1.41E-05	3.04E-05	2.19E-05
TTCAATACCAGTTG	2.12E-05	3.64E-06	0.0002901	0.000185053	1.03E-06	1.21E-05	0.00012897	0.000106876	2.10E-05	6.31E-06	0.000105266	8.54E-05
CGGACCTCTATGCT	2.62E-06	5.60E-06	3.36E-05	2.55E-05	7.36E-07	1.74E-06	1.22E-05	2.29E-05	6.62E-06	4.72E-07	4.60E-06	3.42E-06
CACGTTAATACGAA	1.06E-06	1.68E-06	2.42E-05	2.13E-05	4.21E-07	4.22E-07	5.86E-06	3.22E-06	4.69E-07	4.67E-07	2.87E-06	5.61E-06
GACCAGGGGCGACG	0.000488731	0.000358942	8.53E-05	6.03E-05	0.000294113	0.00033672	6.47E-05	9.51E-05	0.000256243	0.000266769	6.29E-05	8.10E-05
CTAGCGTAGTTTAA	2.71E-05	6.53E-05	1.97E-05	3.25E-05	4.97E-05	4.00E-05	8.59E-06	5.92E-06	1.71E-05	1.97E-05	9.38E-06	8.48E-06
GCTAACGTAATAGG	1.87E-05	2.17E-05	0.00079146	0.000572968	1.26E-05	1.61E-05	0.000502233	0.000591788	2.45E-05	3.81E-05	0.000423813	0.000405571
GTTGCATGACAACG	8.63E-06	7.44E-06	6.92E-06	1.15E-05	1.21E-05	4.68E-06	7.00E-06	7.86E-06	4.31E-06	3.70E-06	5.91E-06	5.17E-06
GAAGCACCAATGTA	0.000218558	0.000201617	3.02E-05	4.65E-05	0.000121612	0.00016572	2.91E-05	4.02E-05	8.50E-05	6.32E-05	9.46E-06	4.55E-05
TTTTTGTTTTATGA	0.000907813	0.000937091	1.73E-05	1.10E-06	0.000812713	0.000769653	1.82E-05	4.24E-05	0.00084209	0.000766357	5.31E-05	5.82E-05
CCCTACCAGGTAAT	1.12E-06	3.83E-06	5.99E-05	9.23E-06	1.03E-06	1.03E-06	2.27E-05	1.68E-05	7.37E-07	9.08E-07	7.67E-06	1.47E-05
GCCGGCGCGGGGTT	2.00E-05	3.08E-05	0.000118193	0.000154819	1.02E-05	1.47E-05	0.000139318	0.000139048	1.48E-05	8.81E-06	8.71E-05	9.58E-05
GTAGCGTGATGAGC	1.59E-05	2.20E-05	1.52E-06	3.49E-06	9.39E-06	4.25E-06	4.67E-06	2.44E-07	3.03E-06	1.86E-06	1.26E-06	3.60E-07
AGATAGACGCTAAA	0.000181339	0.000163845	4.54E-05	5.13E-05	9.37E-05	0.000111515	3.65E-05	4.51E-05	4.11E-05	7.75E-05	3.84E-05	3.02E-05
GTATTTCGGTTCGA	0.00025703	0.000256204	7.34E-05	5.51E-05	0.000171194	0.000191311	4.57E-05	4.82E-05	0.000148256	0.000154496	5.69E-05	6.01E-05
GTCGCTTACTGTGT	0.000373942	0.000302561	0.000431314	0.000373772	0.000191801	0.000142787	0.000277784	0.000355206	0.000155797	0.000149649	0.000192177	0.000167094
GCCCTAGGTTAAAG	0.000104356	0.00011712	0.000314076	0.000269746	5.85E-05	5.94E-05	0.00017046	0.000179858	3.45E-05	2.73E-05	9.93E-05	9.28E-05
CTGTTCTACCGTGA	5.52E-06	1.11E-05	3.64E-05	3.56E-05	8.68E-06	5.05E-06	1.79E-05	1.50E-05	2.26E-06	1.26E-06	4.16E-06	4.87E-06
ACACATAAGGCTTA	1.18E-05	1.76E-05	7.60E-06	2.21E-05	2.68E-06	5.99E-06	7.36E-06	7.65E-06	3.91E-06	3.70E-06	2.30E-06	4.47E-06
CGTACATTAATGTC	1.89E-05	1.24E-05	4.07E-06	9.22E-06	1.19E-05	6.18E-06	8.65E-07	1.87E-07	2.53E-06	2.75E-06	1.98E-06	3.54E-07
GCCGTGGGGGGGGT	2.93E-07	3.08E-07	5.88E-06	6.31E-06	5.01E-07	5.35E-07	4.15E-06	1.28E-06	5.71E-07	5.69E-07	1.91E-06	6.87E-07
AAGTGCCAGTGTTG	2.63E-05	1.65E-05	0.000448164	0.000307185	7.95E-06	1.00E-05	0.000237382	0.000285337	2.43E-05	2.53E-05	0.000295891	0.000242146
CATCTGTGTAGTTA	0.000341052	0.000265573	4.43E-06	6.19E-07	0.000216322	0.000159695	1.19E-05	6.32E-06	0.000112227	0.000142345	1.50E-05	7.88E-06
CTTTCTCGTGTTCA	3.95E-05	3.56E-05	1.09E-06	1.10E-06	4.56E-05	2.41E-05	7.24E-09	4.90E-06	2.64E-05	1.78E-05	1.04E-06	2.23E-06
CTTATTAGAATATG	9.71E-05	6.19E-05	1.23E-05	0.000474465	4.26E-05	8.58E-05	0.000412952	0.000331658	9.01E-05	7.04E-05	0.000366337	0.000366336
GTTGGGGGTGTTTG	9.13E-06	2.15E-06	6.15E-05	4.63E-05	1.50E-07	4.02E-07	9.85E-06	1.16E-05	4.80E-07	4.79E-07	2.03E-06	5.79E-06
GTTCGCAATTTACA	6.78E-05	5.65E-05	2.79E-06	1.10E-06	2.75E-05	3.31E-05	1.04E-06	2.76E-06	1.16E-05	1.67E-05	5.07E-08	5.15E-08
GTCGGCTGAGGTCC	0.00046398	0.000477676	7.59E-05	9.91E-05	0.000388253	0.00044181	0.000159885	0.000195966	0.000489667	0.000450731	0.000168248	0.000211808
TTATTATACAGAAT	6.21E-05	3.92E-05	0.000567757	0.00051387	2.46E-05	8.08E-05	0.000339586	0.000371158	6.28E-05	5.59E-05	0.000403971	0.00033435
GGGTGGCCGCGAGG	3.50E-06	1.07E-06	0.000101682	7.26E-05	1.72E-06	2.59E-06	3.63E-05	3.97E-05	1.02E-06	8.09E-07	2.24E-05	1.70E-05
CGATGGGTCTCGAT	4.41E-06	1.58E-05	0.000186197	0.000250816	1.33E-05	1.61E-05	0.000186388	0.000113399	1.87E-05	1.85E-05	0.000147456	0.000176283
ATTCATTCACATTG	0.000120625	0.000116845	5.54E-06	2.06E-06	7.12E-05	7.82E-05	4.23E-06	1.04E-06	6.41E-05	3.98E-05	1.04E-06	1.04E-06
ATCTGGCTAACCCA	7.10E-06	1.18E-05	8.52E-06	1.31E-05	4.56E-07	1.06E-05	4.44E-06	2.76E-06	2.82E-06	5.38E-07	1.76E-06	2.59E-06
TCATGAAACGGATA	7.26E-06	1.35E-05	4.87E-05	5.03E-05	4.65E-06	4.52E-06	3.32E-05	2.93E-05	3.58E-06	2.81E-06	2.24E-05	3.10E-05
GAAAACCATCCGAT	0.000833453	0.000823396	0.000865997	0.000876545	0.000807943	0.000721814	0.000776987	0.000859343	0.000947155	0.000829287	0.000816777	0.000860548
ATTTTTTAATAATC	0.005743981	0.005504258	0.000269242	0.000420494	0.006747742	0.006515619	0.000575694	0.000559917	0.006951475	0.006952567	0.001204068	0.001201221
GAGTGAGGCATCCG	7.29E-06	6.31E-07	3.26E-05	2.10E-05	2.37E-07	2.37E-07	6.54E-06	1.10E-05	5.44E-07	5.43E-07	2.75E-06	1.39E-06
CCTTTGAGTGCCAA	1.63E-05	8.31E-06	1.25E-05	9.94E-06	4.22E-06	6.34E-06	3.85E-06	5.36E-06	2.13E-06	5.49E-06	6.03E-06	1.04E-05
CACTACCAACTTTT	7.91E-06	1.07E-06	0.000149726	0.000132168	1.03E-06	1.03E-06	8.73E-05	7.09E-05	1.02E-06	2.34E-07	3.87E-05	3.37E-05
ATGTAATCCAGTGG	1.06E-06	1.07E-06	0.000103803	5.83E-05	1.03E-06	1.46E-06	4.10E-05	4.69E-05	1.02E-06	4.64E-06	3.52E-05	2.81E-05
ACTCTGTGTTTTGC	2.48E-05	2.40E-05	4.15E-05	6.18E-05	5.72E-06	2.23E-05	2.36E-05	3.68E-05	5.25E-06	7.59E-06	2.44E-05	1.62E-05
GATTCCGGTAGCCC	1.06E-06	1.12E-06	1.68E-05	2.89E-05	6.58E-08	7.54E-07	1.27E-05	1.26E-05	9.05E-07	3.93E-07	6.24E-06	6.48E-06
AGGAATATACCGAC	1.70E-06	3.81E-06	7.90E-06	1.29E-05	1.31E-06	2.41E-07	1.44E-05	2.88E-06	3.53E-07	1.90E-06	1.18E-05	3.30E-06
CGGAGCAGAGGCAT	0.001583428	0.002360104	1.09E-06	1.10E-06	0.001619292	0.00128461	9.72E-05	5.33E-05	0.000914052	0.001016251	0.000136073	0.000144434
CATCTTTTGAGGGT	0.000632388	0.000440944	0.004081737	0.003564794	0.000378416	0.000342605	0.002985335	0.003725624	0.000617837	0.000506764	0.002542811	0.002286429
GCTTGGGGTAGCAG	7.18E-05	7.98E-05	2.46E-05	1.16E-05	3.85E-05	3.03E-05	8.18E-06	1.30E-05	1.77E-05	1.84E-05	3.49E-06	6.73E-06
TGTCGATTCTTTGA	2.28E-06	4.38E-06	3.65E-05	2.60E-05	1.41E-07	1.48E-06	7.03E-06	1.49E-05	4.37E-07	4.36E-07	8.53E-06	1.74E-06
TGGATATTTAAATA	2.70E-07	2.85E-07	5.96E-06	6.97E-06	4.57E-07	4.57E-07	3.90E-06	3.54E-06	5.18E-07	5.17E-07	3.36E-06	2.27E-06
TCGGGAGCATCTAT	0.006705765	0.00671117	0.006862382	0.005175348	0.006613958	0.007169696	0.005403564	0.006043812	0.005147076	0.004639584	0.004964903	0.004862928
TACTCTTTTAAAAC	3.03E-06	9.69E-06	0.000280905	0.00034279	1.03E-06	1.33E-05	0.000408098	0.000385311	1.23E-05	1.11E-05	0.000383056	0.000398725
CCGCGGACTGGATA	1.52E-05	1.74E-05	3.77E-05	2.56E-05	1.17E-05	7.40E-06	1.69E-05	1.82E-05	2.78E-06	7.63E-06	3.59E-06	2.85E-06
GGAGTAATGGGTCA	6.52E-05	4.47E-05	0.000118359	0.000120543	2.00E-05	2.65E-05	6.85E-05	5.69E-05	2.12E-05	1.99E-05	3.90E-05	3.92E-05
ATCTACGGCTCACC	1.26E-06	6.00E-06	6.31E-05	0.000106772	4.71E-06	1.03E-06	7.05E-05	5.82E-05	2.15E-06	7.48E-06	7.41E-05	7.03E-05
TGGCAATTACTATT	0.001300561	0.001391856	0.000413142	0.000643101	0.001303002	0.001265697	0.000532226	0.000671601	0.001370575	0.0012344	0.00051405	0.000475498
TTTTACAATGGACA	8.77E-06	1.00E-05	1.50E-05	1.40E-05	1.41E-05	5.99E-06	3.39E-06	6.53E-06	5.69E-06	3.16E-06	2.53E-06	3.57E-06
GAGCTGCATGGGTC	0.002334579	0.00235014	4.98E-06	7.96E-06	0.002811316	0.002668272	8.42E-05	6.95E-05	0.002490291	0.002400767	0.000227422	0.00017315
TGCGCGCTGGCCAG	1.06E-06	6.92E-06	0.000200336	0.000162325	1.96E-06	1.94E-06	0.000124929	6.07E-05	7.49E-06	8.06E-06	5.51E-05	6.02E-05
GGCGCCATCCCTAG	4.11E-06	2.71E-07	4.20E-05	3.02E-05	1.03E-06	1.03E-06	1.16E-05	1.94E-05	3.25E-07	3.24E-07	1.25E-05	4.20E-06
CTTTGGAGTTGGGC	1.06E-06	6.45E-06	3.79E-05	4.40E-05	1.03E-06	1.41E-06	2.73E-05	1.81E-05	3.97E-07	3.96E-07	7.33E-06	5.26E-06
GTTTCCTGCCTGGA	1.53E-05	1.97E-05	1.09E-06	8.21E-07	9.86E-06	1.63E-06	4.40E-07	4.38E-06	1.14E-05	1.15E-05	5.59E-06	3.03E-06
TTCTAGTTGAGGGG	1.06E-06	1.07E-06	0.000740599	0.000520186	3.10E-05	3.16E-05	0.000405331	0.000462936	7.60E-05	6.02E-05	0.000355467	0.000361915
CATCTCTTCCCTTT	9.29E-05	9.37E-05	0.000161629	0.0001417	0.00012551	9.20E-05	0.000133628	0.000112225	0.00011267	0.00010564	0.000181429	0.000131686
GATTCGGAGGGAAA	0.002434238	0.002240484	0.002247288	0.002532163	0.002542741	0.002045919	0.002358212	0.002820053	0.001517274	0.001546337	0.002167647	0.002180488
GGTGGGGCGGGGAG	6.65E-05	3.98E-05	1.09E-06	1.10E-06	3.38E-05	2.62E-05	1.04E-06	3.67E-05	2.62E-05	3.34E-05	1.04E-06	1.04E-06
TCTCCGGAGTCGAC	1.36E-05	5.48E-06	1.35E-05	1.39E-05	1.33E-05	4.44E-06	6.90E-06	1.92E-05	2.81E-06	3.65E-07	6.57E-06	7.69E-06
CGTGGAGAGGTCTC	0.000114718	0.000288489	0.000117751	0.00021146	0.000173219	0.000136549	8.94E-05	0.000111348	5.98E-05	4.84E-05	5.45E-05	5.09E-05
ATCCCAGCGCTGCT	6.98E-05	0.000105717	6.83E-06	1.61E-05	8.28E-05	0.000147524	2.05E-05	1.96E-05	0.000141928	0.000138304	3.07E-05	2.48E-05
ACTTACGAGGATGT	0.000566001	0.000327211	0.003739987	0.002889644	0.000293026	0.000239229	0.001827562	0.002130033	0.000355444	0.000384736	0.001380529	0.001470239
GCGGCTTTATGTTG	1.97E-05	1.98E-05	1.43E-05	1.10E-05	1.41E-05	2.73E-06	9.46E-06	1.98E-05	6.70E-06	8.87E-06	6.36E-07	2.61E-06
GTGTAAGAAGAAGA	4.59E-07	4.75E-07	4.76E-06	2.14E-06	4.40E-07	4.41E-07	3.05E-06	5.16E-06	5.55E-07	5.54E-07	2.99E-06	5.11E-07
AGACTTTACCCCCA	0.001049455	0.001039996	0.000756068	0.000805946	0.000922532	0.000818331	0.000707418	0.000718737	0.000692817	0.000675016	0.000653044	0.000684607
GATCCACCCCTGTT	3.17E-07	3.32E-07	6.84E-06	4.60E-06	4.55E-07	4.55E-07	7.49E-07	6.78E-06	5.58E-07	5.57E-07	1.07E-06	2.27E-06
CGCGAGGGGGAGCT	1.72E-06	2.56E-06	1.91E-05	1.62E-05	2.93E-07	2.94E-07	8.15E-06	6.78E-06	5.69E-07	5.68E-07	9.47E-07	1.74E-06
GGTCATAATTTCTT	0.000551169	0.000384242	0.00078496	0.000844424	0.000429783	0.000494413	0.000742605	0.000840875	0.000504703	0.000411447	0.000840674	0.000814063
GTCAGTGAGTTTGG	0.001955387	0.001992145	0.000450754	0.000359315	0.001500513	0.001551087	0.00041707	0.000470139	0.001460654	0.001338208	0.000397934	0.000361718
GGCGGTAAAGTGGC	1.57E-05	9.07E-06	1.76E-06	1.09E-05	3.93E-06	5.77E-06	2.51E-06	2.46E-06	2.85E-06	1.95E-06	2.58E-06	3.61E-07
TGAAGGTGAGCGGC	1.76E-06	1.28E-05	1.30E-05	2.07E-05	8.88E-07	2.49E-09	1.76E-05	1.07E-05	1.51E-06	5.70E-07	2.50E-06	3.14E-06
AACGGAATGATGGG	0.000114106	0.000113742	1.09E-06	1.10E-06	5.31E-05	5.56E-05	1.04E-06	1.04E-06	2.19E-05	4.09E-05	1.04E-06	1.04E-06
GTGGAGTGGTGTGT	9.80E-06	1.17E-05	1.09E-06	2.61E-05	3.57E-06	1.21E-05	2.63E-05	2.50E-05	6.95E-06	3.95E-06	8.16E-06	8.47E-06
TTACGCCGTGCCGC	2.80E-07	8.29E-07	5.06E-06	7.52E-06	1.84E-06	3.89E-07	8.64E-06	1.91E-06	1.45E-06	4.52E-07	4.06E-06	5.25E-06
GTAAAGCCCTCATG	1.06E-06	1.80E-06	5.34E-05	8.36E-05	1.24E-06	1.03E-06	4.37E-05	6.76E-05	1.86E-06	1.02E-06	3.11E-05	2.83E-05
TGGCCTAGCGATGG	0.001281398	0.001307507	0.003414107	0.002649537	0.0012943	0.001238006	0.002536567	0.00268257	0.001044609	0.000920947	0.002505133	0.002498591
CCTATGATTGATGA	5.65E-05	8.32E-05	1.09E-06	5.28E-06	2.79E-05	4.61E-05	1.04E-06	2.90E-06	2.39E-05	3.74E-05	1.96E-06	9.47E-07
TGTATAACATACGG	8.93E-06	1.64E-06	0.000121933	8.99E-05	1.03E-06	5.87E-07	4.08E-05	5.21E-05	3.25E-06	2.68E-06	3.59E-05	2.70E-05
ATCCAGTTAACAGA	5.05E-07	5.76E-07	3.08E-06	3.37E-06	1.54E-06	4.67E-07	6.01E-06	9.41E-07	4.82E-07	4.81E-07	4.20E-06	3.50E-06
GTAGCCGTTCATTT	5.48E-05	7.92E-05	3.15E-05	5.71E-05	4.06E-05	5.66E-05	3.12E-05	2.39E-05	3.42E-05	2.30E-05	1.57E-05	1.89E-05
CTCTAACTGGCACG	8.52E-06	2.16E-05	8.97E-05	0.000134125	1.27E-06	1.03E-06	7.93E-05	6.50E-05	3.73E-06	1.02E-06	3.04E-05	2.37E-05
ATATTCAGCTTAAG	4.71E-05	3.69E-05	2.20E-05	1.11E-05	1.31E-05	1.60E-05	8.79E-06	8.99E-06	4.67E-06	3.53E-06	2.18E-06	7.10E-06
GGTTGGGAGGGTGC	1.34E-05	1.59E-05	0.00018726	0.000241232	3.45E-07	6.42E-06	0.000240262	0.000268983	2.32E-05	1.64E-05	0.000196047	0.000170251
GTTGTTTAACTTTA	6.66E-05	6.83E-05	3.64E-06	2.09E-06	3.92E-05	3.40E-05	1.83E-06	7.44E-06	8.84E-06	1.18E-05	1.51E-07	1.52E-07
GCTGGTAGAGTAGC	0.000358634	0.000327272	1.09E-06	4.79E-06	0.00021831	0.000222319	1.10E-05	9.35E-06	0.000110214	0.000116026	1.37E-05	5.27E-06
GGATTAACAGGCGG	6.05E-06	3.23E-05	2.34E-05	8.17E-06	1.38E-05	9.78E-06	5.38E-06	6.55E-07	5.75E-06	7.62E-06	1.63E-06	1.05E-06
TGTATTTTGTTAAT	1.90E-05	3.98E-05	0.000202829	0.000166766	9.08E-06	7.24E-06	0.000129239	0.000117812	1.68E-05	9.79E-06	8.05E-05	6.64E-05
GCCTGTGAGGTGGA	3.82E-07	3.11E-06	1.35E-05	1.18E-05	4.44E-07	9.15E-07	4.15E-06	3.86E-06	3.50E-07	1.50E-06	1.06E-05	4.72E-06
TTTCAGGCATAGGG	3.89E-06	8.33E-06	4.74E-05	3.12E-05	1.14E-07	1.13E-05	2.44E-05	2.60E-05	5.20E-06	6.41E-06	5.86E-06	9.69E-06
GTTTCGAAGTTCCG	2.49E-06	1.90E-06	4.28E-05	2.05E-05	1.63E-07	1.63E-07	9.26E-06	1.16E-05	2.14E-06	2.67E-06	9.56E-06	6.26E-06
TGTGCAACCGAAGA	5.73E-05	5.82E-05	5.28E-05	6.07E-05	4.27E-05	3.86E-05	5.84E-05	7.04E-05	3.36E-05	2.17E-05	3.86E-05	4.44E-05
TCCTACGACTGTGC	1.16E-05	5.13E-07	2.94E-05	5.95E-05	1.03E-06	6.03E-06	1.42E-05	2.39E-05	1.93E-06	3.88E-06	1.89E-05	2.72E-05
TCGACTCGCTACGT	9.65E-06	1.38E-05	0.000188173	0.000210102	1.03E-06	8.09E-06	0.000175129	9.30E-05	2.52E-06	1.42E-05	0.000128611	0.000133318
GCATGTTATTTTGT	8.86E-06	1.01E-05	0.000159568	0.000113789	3.06E-06	3.00E-06	7.03E-05	8.66E-05	1.38E-06	1.04E-05	8.49E-05	7.59E-05
GGGTAGCGAAGGGG	1.06E-06	1.07E-06	0.000119224	8.80E-05	1.03E-06	1.03E-06	4.69E-05	9.58E-05	1.02E-06	1.02E-06	3.71E-05	3.53E-05
GCGTGGACGCGGAA	0.007230447	0.006805105	0.000964263	0.000985714	0.005315717	0.006943707	0.000891935	0.001051313	0.005254034	0.004537585	0.001223176	0.001051076
GGCTGGGGCGCCCC	0.000104229	0.000127326	0.000152119	0.000300554	9.97E-05	8.48E-05	0.000181077	0.000143374	4.92E-05	3.15E-05	0.000105515	0.000103655
CGATCTGATCTCGG	0.000123254	0.000104148	0.001232436	0.000972821	7.46E-05	8.25E-05	0.000894738	0.000985908	0.000134779	0.000103134	0.000791634	0.000786478
GATCTGTAGTCCCG	0.001004935	0.0008017	0.00231449	0.002104939	0.000861908	0.000844513	0.002134435	0.002603821	0.00086123	0.00077647	0.00218521	0.002314097
GACGTACTTTAGGA	0.003291046	0.002835639	0.002829938	0.003503197	0.003732794	0.003859523	0.005248611	0.006068879	0.006510408	0.006151441	0.006406026	0.006403211
GCGGCCTGGCGGGA	5.33E-05	4.93E-05	7.32E-05	0.000124298	1.47E-05	1.78E-05	5.11E-05	5.07E-05	1.05E-05	4.62E-06	1.09E-05	8.23E-06
GTCCCTTAGCACTT	5.66E-05	1.91E-05	0.000504455	0.000602012	2.84E-06	1.16E-05	0.000639789	0.000706766	5.24E-05	2.09E-05	0.000458179	0.000478014
TACGGGGCCGACGC	3.81E-06	1.07E-06	1.97E-05	1.70E-05	1.72E-07	4.90E-06	7.15E-06	1.32E-05	3.85E-07	8.70E-07	7.68E-06	5.61E-06
GATGTAATATATCT	0.001336753	0.001266901	0.000202112	0.000326851	0.001216964	0.001277188	0.000375405	0.000469479	0.001382849	0.001459467	0.000532449	0.000495208
CAGGAATTAAGGGT	0.000117882	0.000570801	9.80E-05	0.000169195	0.000762269	0.000543821	0.000125688	1.11E-05	0.000402436	0.000322776	0.000120696	0.000141017
CTAGACATCTGTTG	2.56E-06	1.07E-06	0.000133377	0.000108128	3.38E-08	1.03E-06	7.85E-05	4.92E-05	4.60E-06	5.07E-06	7.27E-05	7.00E-05
TTCCTTAGTCACTA	3.72E-05	2.66E-05	0.000508072	0.000672416	1.32E-05	1.10E-05	0.000580082	0.000636132	4.52E-05	2.84E-05	0.000513656	0.0004757
GGTCGCGTCAGTGC	0.000227637	0.000206994	5.06E-05	6.03E-05	0.000101575	0.000103493	2.92E-05	2.02E-05	3.71E-05	4.47E-05	2.33E-05	3.34E-05
TGGTTGCGGCGCTG	8.56E-06	2.16E-06	0.000102184	6.86E-05	6.31E-06	2.98E-06	5.17E-05	5.13E-05	1.91E-06	2.35E-06	2.86E-05	3.74E-05
TGATATTGAGTCGT	0.00328631	0.00311711	0.000470494	0.000279892	0.00282967	0.002658256	0.000321194	0.000434917	0.001936819	0.002035506	0.000422259	0.000395081
GCTCGATGATCGGA	7.02E-06	8.56E-06	4.29E-05	5.66E-05	1.03E-06	2.98E-06	3.97E-05	2.36E-05	1.33E-06	8.60E-09	2.04E-05	1.44E-05
AAGGCTGACGACCC	0.000499199	0.000579361	0.0002187	0.000319235	0.000441558	0.000475295	0.000332149	0.000325437	0.0003733	0.000397869	0.000248914	0.000288363
GGTTGTTACTGATG	6.79E-08	8.09E-08	1.01E-05	9.24E-06	5.19E-07	5.19E-07	7.49E-07	3.87E-06	1.19E-06	5.13E-07	2.50E-06	3.32E-06
GATGGTATTATCAA	2.34E-06	8.24E-07	7.71E-06	1.55E-05	3.69E-07	3.69E-07	5.68E-06	5.81E-06	5.30E-07	5.28E-07	2.87E-06	2.09E-06
TCCCGGCTAGATTC	0.000151191	0.000252447	5.80E-05	0.000113365	5.63E-07	2.67E-06	9.77E-07	1.57E-06	1.27E-06	1.40E-06	3.89E-07	6.68E-07
TGGTATAAGCAGGT	9.41E-06	9.13E-06	5.20E-05	5.41E-05	6.73E-06	8.77E-06	1.59E-05	1.14E-05	6.88E-06	8.79E-08	2.07E-05	9.39E-06
TCTCATCATCGCGC	0.000542479	0.000419191	0.000569288	0.000899481	0.000471529	0.000541307	0.000793765	0.000927032	0.000460467	0.000402605	0.000939647	0.000926167
TAGTTCGGTTTCAT	0.005223824	0.005204697	0.000263397	0.000209247	0.006601367	0.005778813	0.000312431	0.000344007	0.007115066	0.007496254	0.000810518	0.000810606
AGCGGGTAGGGGGC	7.68E-06	5.61E-06	1.69E-05	2.41E-05	2.70E-07	2.70E-07	1.05E-05	5.49E-06	4.71E-07	1.43E-06	5.51E-06	2.78E-06
TGGTGTTCCCGGCG	1.80E-05	2.07E-05	2.38E-06	1.76E-06	1.01E-05	3.17E-05	3.53E-06	1.06E-06	2.86E-06	3.34E-06	1.36E-06	9.72E-07
GTCTAATGTCCTTG	5.58E-05	6.14E-05	1.10E-05	1.55E-07	2.72E-05	2.36E-05	8.56E-07	1.04E-06	8.36E-06	6.60E-06	2.27E-07	2.27E-07
TGGGGCTCTGTGGG	2.60E-07	1.70E-06	7.84E-06	5.32E-06	2.65E-07	2.65E-07	6.88E-06	9.37E-06	5.51E-07	5.50E-07	2.51E-06	1.21E-06
CCCGTGTCGCTGGG	3.94E-07	3.20E-06	5.42E-05	4.57E-05	5.38E-06	3.91E-08	3.72E-05	3.06E-05	1.02E-06	1.50E-06	3.01E-05	1.74E-05
CGAGGCAGTGGAGG	1.54E-05	7.21E-06	0.000296701	0.00018236	3.63E-06	3.36E-06	0.000178059	0.000176798	1.86E-05	1.47E-05	0.000155951	0.000132559
CAGAGCGGGGCAGG	0.0002032	0.000305758	5.80E-05	3.57E-05	0.000242254	0.000260929	3.41E-05	4.30E-06	0.000168615	0.000114176	2.26E-05	3.56E-05
CTGTCTTCGCAAAC	3.77E-05	0.000126345	1.01E-05	1.90E-05	7.05E-05	4.85E-05	2.16E-05	1.36E-05	3.73E-05	4.92E-05	1.12E-05	1.96E-05
ACCAATTACCATAA	1.06E-06	1.07E-06	4.86E-05	5.16E-05	6.11E-06	4.48E-06	2.32E-05	1.12E-05	1.46E-06	1.62E-06	1.52E-05	2.59E-06
ATTAAAATTCCTTG	6.95E-05	6.05E-05	6.20E-05	7.01E-05	4.94E-05	5.38E-05	4.18E-05	4.75E-05	2.97E-05	1.97E-05	4.69E-05	3.38E-05
CGATACGGGGGGTG	1.06E-06	1.07E-06	0.000301587	0.00075924	1.03E-06	1.03E-06	0.000742008	0.000145028	1.02E-06	1.02E-06	0.000590921	0.000612352
TTTTTTGGTTTTGT	0.000273809	0.000243446	6.64E-05	4.79E-05	0.000167954	0.000157186	4.05E-05	3.90E-05	0.000109539	0.000122843	6.55E-05	4.77E-05
AGGGTGGTAAGGCT	9.71E-05	1.07E-06	0.001084939	0.000923764	1.47E-05	1.38E-05	0.000915336	0.000822582	7.15E-05	4.98E-05	0.000810026	0.000777637
TCTAACGTTAGCAT	2.55E-05	3.96E-05	6.06E-07	1.10E-06	6.48E-06	9.38E-06	2.00E-06	2.38E-06	9.32E-06	1.35E-05	1.22E-07	7.53E-07
TGTTCAACACGCGC	4.86E-05	2.01E-05	0.000386467	0.0003826	6.18E-06	1.05E-05	0.000161775	0.000170854	1.01E-05	7.01E-06	8.14E-05	0.000164097
CACGCCTAGTACAG	1.14E-05	2.14E-05	1.38E-05	1.22E-05	9.67E-06	3.93E-06	5.77E-06	3.70E-06	5.28E-06	1.66E-06	3.88E-06	6.94E-06
ATACCTTGCGTTGT	0.000705542	0.00075471	2.85E-05	1.10E-06	0.000623208	0.000696408	3.56E-06	1.04E-06	0.000513728	0.000554006	2.44E-05	2.47E-05
AATATATACTCATG	6.69E-06	8.52E-06	4.67E-05	8.59E-05	2.77E-06	5.37E-06	3.93E-05	4.91E-05	1.02E-06	1.02E-06	2.97E-05	2.28E-05
GGGTGTGTGCGGAA	0.000437571	0.00039444	0.000547737	0.000597113	0.000104787	0.000137498	0.000174762	0.000178851	4.24E-05	3.67E-05	6.15E-05	5.39E-05
ATTAAAGTATAGTT	5.74E-05	2.88E-05	0.000374447	0.000645136	9.74E-06	3.11E-06	0.000459404	0.000455152	2.01E-05	2.84E-05	0.000398507	0.000361648
AGTTCCGCTACGCG	8.77E-06	7.86E-06	4.92E-05	5.47E-05	7.77E-06	4.32E-06	2.85E-05	3.32E-05	6.21E-06	2.88E-06	1.50E-05	7.08E-06
TTTTCCGGGAGCAA	2.99E-05	2.80E-05	0.000228072	0.00025566	2.55E-05	6.95E-06	0.000174814	0.000204612	2.69E-05	4.43E-05	0.000125127	0.000123987
GTCCCCTTTAAATA	0.00035338	0.000303116	0.000178638	0.000251278	0.000351865	0.000262788	0.000247595	0.000241488	0.000223793	0.000269504	0.000181249	0.000217706
TCAATTCTTATTTG	2.81E-07	1.07E-06	7.88E-05	3.99E-05	1.07E-06	8.08E-06	2.29E-05	3.13E-05	9.57E-08	1.37E-06	1.36E-05	1.63E-05
GTCGGGGGAGTGGG	0.000407458	0.000371674	0.0001316	0.000116652	0.000290942	0.000303239	5.92E-05	9.17E-05	0.000200554	0.000157762	5.51E-05	4.46E-05
TCAACTCTCTACCC	0.000431414	0.000562692	8.71E-05	0.000141762	0.000334779	0.000371319	0.000103488	0.000122901	0.000269338	0.000230727	8.29E-05	8.65E-05
TCGCTTGGTCTCTC	0.000984447	0.000963279	0.000254984	0.000275126	0.000467749	0.000533622	0.000296486	0.00034472	0.000476333	0.000398647	0.000226876	0.000217743
CATTTTGGTCAATC	4.04E-07	7.16E-06	6.32E-06	1.80E-05	2.06E-06	3.64E-06	4.77E-06	8.33E-06	5.03E-07	5.02E-07	2.99E-06	3.50E-06
AGAATCGTTTGGAT	2.49E-07	1.97E-06	1.57E-05	1.38E-05	3.27E-07	3.27E-07	3.39E-06	1.00E-05	4.89E-07	4.87E-07	5.04E-06	2.27E-06
GGTTGCGTACACGA	0.0037831	0.003665242	8.12E-05	6.23E-05	0.002962568	0.003067606	5.18E-05	0.000108504	0.002617041	0.002398759	0.000195679	0.000192612
GGAGGGAAGATGTG	0.000215509	0.00022766	1.09E-06	5.54E-05	0.000159053	0.000142462	3.89E-05	1.04E-06	0.000114388	8.14E-05	4.86E-05	1.83E-05
TCAATGCATTATGT	0.000151761	0.000128564	0.000165429	0.000136407	5.12E-05	4.88E-05	4.12E-05	6.63E-05	1.77E-05	1.72E-05	2.89E-05	1.46E-05
GGTCAGGTTCCTTA	7.31E-06	2.42E-05	5.78E-05	3.90E-05	4.48E-06	5.35E-06	1.01E-05	4.39E-06	5.64E-06	3.46E-06	9.50E-06	8.49E-06
ACAGCTGGGATGGG	5.43E-06	8.90E-06	8.03E-05	5.43E-05	8.44E-06	1.03E-06	4.64E-05	6.23E-05	3.17E-06	7.76E-06	1.20E-05	1.87E-05
GTCGCCCTTGAGCG	0.000543705	0.000394854	0.003097604	0.003022194	0.000262189	0.00027308	0.001372675	0.001296088	0.000309786	0.000237551	0.000966273	0.001292443
CTTAGGACCCGTGG	1.28E-05	6.14E-06	5.93E-05	5.28E-05	1.03E-06	7.56E-06	1.64E-05	4.16E-05	4.76E-07	1.25E-07	1.51E-05	1.30E-05
GACCGGTCCGCACG	1.06E-06	3.24E-06	0.000272891	0.000237251	1.03E-06	5.47E-06	0.000208005	0.000200101	1.42E-05	6.13E-06	0.000149025	0.000126757
CACCCTATACTCGC	4.28E-06	4.42E-06	1.55E-05	2.09E-05	3.64E-07	3.64E-07	8.49E-06	3.22E-06	5.57E-07	5.56E-07	2.51E-06	8.63E-07
GCCTTTAGCTCCCA	3.61E-05	0.000235903	5.16E-07	1.86E-05	0.000154166	0.000152508	7.75E-06	1.04E-06	7.17E-05	9.10E-05	4.10E-06	1.67E-05
GAGGTTTGAAGTTG	1.39E-05	2.04E-05	0.00010628	8.19E-05	3.23E-06	2.87E-06	2.33E-05	3.97E-05	2.49E-06	3.37E-06	7.74E-06	6.42E-06
TCCTCTCATCTTGG	0.00010622	0.000143383	1.08E-05	2.41E-06	4.26E-05	8.83E-05	1.04E-06	8.62E-06	2.82E-05	1.91E-05	4.19E-06	3.24E-06
TGTCCACTCAATGG	1.29E-05	2.09E-05	0.000179186	0.000131811	3.60E-06	9.43E-06	8.27E-05	0.000114	3.11E-06	6.66E-06	5.11E-05	4.73E-05
ACTGTTTGCACTAA	0.008197737	0.009153918	0.000360037	0.000231585	0.009326204	0.007856214	0.00034733	0.000411237	0.009209651	0.00992899	0.000578996	0.000562488
TCTTTAACAGGGTT	3.70E-06	1.07E-06	2.51E-05	2.26E-05	1.64E-07	1.40E-06	1.38E-05	7.09E-06	8.96E-07	1.73E-06	1.24E-05	1.02E-05
ATGGGCTGATGAGG	7.10E-06	4.85E-06	0.00034311	0.000203908	1.05E-05	6.84E-06	0.000178752	0.000211282	1.46E-05	2.04E-05	0.000153624	0.000171034
CTATAGGTAAGCGC	6.83E-05	3.84E-05	0.000137879	0.000182764	3.51E-05	2.88E-05	0.000104298	9.45E-05	2.08E-05	3.09E-05	6.40E-05	4.62E-05
GTCGGTAGGGGGGA	9.31E-05	0.000489662	1.09E-06	0.000111936	0.000286125	0.000144901	7.52E-05	1.04E-06	0.000117943	0.000178981	3.91E-05	6.15E-05
GCCATAATCAGGGT	4.17E-06	1.07E-06	5.99E-05	4.04E-05	1.03E-06	1.03E-06	1.83E-05	1.46E-05	4.49E-07	5.97E-06	4.12E-06	5.36E-06
GTGGAGGAGTACGC	3.43E-05	2.43E-05	6.77E-07	5.99E-06	1.67E-05	2.15E-05	1.02E-06	2.40E-06	6.43E-06	8.33E-06	2.29E-07	2.30E-07
GGTGCGGCAGTGTC	0.000358823	0.000261428	0.000684276	0.000918366	0.000235626	0.000296811	0.000953954	0.001143319	0.000363621	0.000335499	0.000756147	0.000857574
GGTTGGAACAGGTG	0.000236434	0.000290245	3.34E-06	1.10E-06	0.000168752	0.000186467	5.57E-06	1.08E-05	0.000119917	0.000117757	5.52E-06	1.09E-05
TTGTTGGTGGTTGG	0.000374048	0.00035242	0.003299753	0.00211182	0.000268646	0.000313116	0.002047848	0.002429523	0.000279826	0.000277281	0.001536604	0.001527254
GTGGAATTAGTCAG	0.001061453	0.001048306	0.000545165	0.000507947	0.000838201	0.000805957	0.00049713	0.000539914	0.000736941	0.000833393	0.000301019	0.000383786
TTCCACGTTAGCCG	0.00027177	0.000272694	0.000615423	0.000424708	0.00015772	0.000205364	0.000277766	0.000320529	0.000166674	0.000180673	0.000298106	0.000221689
AGGGGGAGGTCGGG	0.001948568	0.002414026	1.09E-06	1.10E-06	0.001981987	0.001969313	1.04E-06	1.04E-06	0.001735258	0.001598641	1.04E-06	1.04E-06
GTAGAGGGGTCGGG	0.001815917	0.001632291	0.000468748	0.000351119	0.001469282	0.001511857	0.000364363	0.000433571	0.001370482	0.001242769	0.000337207	0.000352068
TGGGGCCAAGAGAG	9.29E-05	0.000113249	1.09E-06	6.07E-06	5.33E-05	5.62E-05	9.24E-07	5.66E-06	3.82E-05	3.41E-05	5.06E-06	1.15E-06
GGGTTGGAGGGGAG	1.06E-06	1.07E-06	0.000612554	0.000498136	1.03E-06	1.03E-06	0.000400353	0.000448391	1.02E-06	1.02E-06	0.000385755	0.000330789
TGTGGGATAGGGGC	0.001809129	0.001820962	0.000375932	0.000500351	0.001072923	0.001252874	0.000522042	0.000626299	0.00091547	0.000830227	0.000398294	0.000509046
GGATGGTCGGGGCC	0.002049199	0.001692854	0.00043124	0.000598329	0.001767918	0.001927988	0.000571662	0.000702228	0.002048931	0.001918751	0.000818812	0.000775361
TCACAGCTACTTTA	3.70E-06	1.07E-06	2.69E-05	2.08E-05	3.74E-07	1.06E-06	5.76E-06	5.48E-06	2.45E-06	4.88E-07	2.85E-06	4.35E-06
GCATTATGCGTCTT	4.48E-05	2.76E-05	8.30E-06	9.03E-06	1.04E-05	5.74E-06	8.06E-07	7.56E-07	1.92E-06	1.56E-06	3.78E-07	3.79E-07
CATCTTCGATATAT	1.18E-05	2.35E-05	0.000148804	0.000106973	4.04E-06	2.00E-06	6.14E-05	7.66E-05	1.17E-05	1.92E-06	2.01E-05	4.80E-05
TATTACTCCATCGG	8.04E-05	6.98E-05	0.000174248	9.92E-05	2.51E-05	2.17E-05	6.62E-05	5.76E-05	1.48E-05	1.86E-05	2.76E-05	1.69E-05
CATCTGAGCGGTAC	0.000238958	0.000222545	0.000216252	0.000382733	0.000117689	0.000129232	0.000311433	0.000360234	0.000116421	0.000114547	0.000308643	0.000279121
GTATGTGGAGCGGC	8.79E-05	0.000106468	9.61E-05	0.00012394	9.76E-05	8.98E-05	0.000100009	0.000113291	0.000104905	8.54E-05	0.00014787	0.000112383
ATAAGGGCGGCGTA	6.49E-07	1.58E-07	8.90E-06	8.00E-06	4.57E-07	4.58E-07	5.17E-06	2.25E-06	4.90E-07	4.88E-07	3.60E-06	3.68E-06
TCCTTGCGGGACAT	1.06E-06	1.29E-06	6.25E-06	1.29E-05	3.45E-07	9.24E-07	9.68E-06	2.89E-06	1.48E-06	1.21E-06	3.69E-06	3.65E-06
AGTCCTGTATTTCA	4.76E-07	4.32E-09	4.77E-05	6.48E-05	3.23E-06	8.27E-07	3.37E-05	3.81E-05	1.08E-06	2.42E-06	1.70E-05	1.35E-05
GGCGGGGCTGAGAA	0.00010152	0.001511619	5.05E-05	0.000735165	0.000601646	0.0003683	0.001017135	7.84E-05	0.00053297	0.000924447	0.001138774	0.001237455
GGACGCGTATCCGT	1.06E-06	2.98E-06	3.24E-05	1.46E-05	1.03E-06	5.67E-06	1.85E-05	1.64E-05	1.16E-06	4.92E-07	2.86E-06	4.20E-06
AGGCTGGGGGAGAG	1.23E-05	1.12E-05	3.64E-05	6.17E-05	1.03E-06	5.22E-06	2.40E-05	3.16E-05	5.01E-06	3.12E-07	6.30E-06	1.10E-05
ATACTAAGGGTTAG	7.41E-05	6.42E-05	3.46E-05	3.31E-05	3.13E-05	4.83E-05	1.32E-05	2.45E-05	1.38E-05	2.97E-05	1.48E-05	1.47E-05
GCAGTGAGGGCGAC	5.77E-06	1.18E-05	8.62E-05	0.000112902	9.43E-06	4.52E-06	7.58E-05	5.64E-05	9.16E-06	1.24E-06	4.11E-05	5.24E-05
AGTGTGAAATGCGG	1.88E-05	3.47E-05	2.38E-05	1.52E-05	9.47E-06	1.04E-05	1.86E-05	3.93E-06	1.76E-06	8.93E-07	8.63E-06	1.02E-06
TGATTTTCCGCCGG	7.94E-05	6.22E-05	7.12E-05	7.07E-05	2.78E-05	1.65E-05	2.78E-05	3.82E-05	2.03E-05	1.73E-05	3.59E-06	1.23E-05
GCCGGCCAGAACTT	3.16E-05	4.96E-05	1.09E-06	1.18E-06	4.65E-05	4.53E-05	1.04E-06	2.34E-06	2.49E-05	3.12E-05	1.42E-06	2.42E-06
GGGGAGGGTTGCGG	1.06E-06	1.07E-06	5.30E-05	8.00E-05	1.31E-05	6.60E-06	3.17E-05	1.01E-05	3.45E-06	3.90E-06	1.78E-05	3.35E-05
GTGGGGGTGGAGGT	1.06E-06	5.60E-06	9.49E-06	1.48E-05	3.28E-07	3.39E-06	9.38E-06	9.98E-06	5.57E-07	7.27E-07	1.67E-06	1.74E-06
GTTGGGTGGTGGGA	0.001466042	0.001134276	0.000294286	0.000377315	0.00104626	0.001191424	0.000371352	0.000427589	0.001221576	0.001350139	0.000546159	0.000436019
GCTAGTGGGGTGCG	0.000688169	0.00068895	0.000101898	0.000105552	0.000546081	0.00060446	7.43E-05	0.000131251	0.000488977	0.000482034	0.000100618	0.000105436
TCAGGATGCATGGA	4.50E-05	3.06E-05	4.12E-05	4.39E-05	2.35E-05	1.79E-05	3.34E-05	3.47E-05	8.21E-06	7.93E-06	1.87E-05	2.72E-05
ATCGGCCGGATTAC	0.000339359	0.000602343	0.000329155	0.000531048	0.000629182	0.000657129	0.000615923	0.000404169	0.000536694	0.000469942	0.000545739	0.000489909
TCACTAACACGTCA	1.11E-06	1.07E-06	1.71E-05	2.28E-05	4.20E-07	4.20E-07	5.94E-06	3.22E-06	4.51E-07	4.50E-07	2.63E-06	6.84E-06
GAAGGTGTTTTGGG	1.90E-06	2.21E-07	7.27E-06	7.59E-06	5.36E-07	8.97E-07	1.26E-06	2.57E-06	5.26E-07	5.24E-07	2.39E-06	2.80E-06
TGACAGCATTATTC	2.69E-06	1.07E-06	6.77E-05	7.21E-05	1.03E-06	1.03E-06	7.78E-05	5.21E-05	3.78E-06	1.02E-06	6.01E-05	3.75E-05
GTTTCGCGGGGGCG	2.46E-08	1.07E-06	1.02E-05	1.91E-05	2.66E-07	2.70E-06	1.26E-05	3.51E-06	4.14E-07	4.12E-07	4.44E-06	7.19E-06
GATGTAGTCCGGGG	1.75E-05	3.77E-05	0.00047353	0.000310897	1.93E-05	1.28E-05	0.000160022	0.000201714	1.54E-05	4.36E-06	0.000114745	0.00010217
ATGCTGGGTATTCA	0.000101881	8.28E-05	4.79E-05	3.86E-05	4.61E-05	5.79E-05	2.61E-05	5.20E-05	3.91E-05	2.29E-05	1.80E-05	1.13E-05
TTGCTAAGTCGGAG	1.06E-06	1.07E-06	0.000131685	8.23E-05	6.60E-07	1.03E-06	5.42E-05	4.04E-05	5.89E-06	3.39E-06	4.65E-05	5.00E-05
TTGACAGAGTGCAT	0.000156037	0.000141037	0.000283056	0.000280177	8.00E-05	9.62E-05	0.000151586	0.000155151	5.15E-05	4.31E-05	7.56E-05	6.48E-05
AGGTGTCGGTTTGT	1.06E-06	2.82E-06	1.80E-05	1.99E-05	7.32E-08	7.34E-08	1.08E-05	1.42E-05	2.16E-06	5.21E-07	2.73E-06	2.60E-06
TCTTACAGACCCTT	1.06E-06	7.62E-07	9.53E-06	1.57E-05	5.24E-07	5.25E-07	2.11E-06	2.25E-06	1.19E-06	5.15E-07	3.11E-06	2.61E-06
TCTCGAACGTGCAC	4.21E-07	4.36E-07	4.76E-06	3.37E-06	2.09E-06	5.44E-07	2.52E-06	9.34E-07	5.69E-07	5.68E-07	9.47E-07	1.74E-06
GACTACTCAAGGGT	3.15E-05	2.21E-05	0.000556938	0.000393763	1.45E-06	1.44E-05	0.000343043	0.000420882	1.22E-05	3.01E-05	0.000273592	0.000264402
ATACCGGTGCTGTC	0.004469617	0.004532569	2.04E-05	0.000126612	0.004874486	0.005171618	0.000115293	0.000147983	0.005106955	0.004795443	0.000280119	0.000252856
CCGGTAACGAAAAG	6.76E-05	6.44E-05	3.07E-06	7.39E-07	3.09E-05	1.78E-05	1.65E-06	6.46E-07	2.88E-06	6.32E-06	3.03E-07	3.03E-07
GGCTTGAGGGTGGG	2.25E-05	2.54E-05	0.000416351	0.000324874	1.84E-05	2.66E-05	0.000332594	0.000320517	3.79E-05	4.27E-05	0.000259384	0.000223646
GGTAGCTGACAAAT	8.40E-06	1.24E-06	4.09E-05	6.03E-05	1.03E-06	6.03E-06	2.29E-05	3.03E-05	1.36E-07	1.34E-07	1.94E-05	8.25E-06
GCGTTGGGGGATGG	0.00018775	0.000191604	1.09E-06	1.10E-06	0.000113685	0.000122137	0.000186349	1.04E-06	8.56E-05	5.63E-05	1.04E-06	0.000121353
AAGTTCGAACTTAG	0.010326747	0.009858801	0.002917474	0.001725151	0.013722635	0.013789978	0.002749295	0.002890311	0.014370742	0.013979116	0.005506798	0.005273945
CTCTTGTTCCCTCG	3.67E-05	4.04E-05	0.000700396	0.00099228	2.68E-05	4.56E-05	0.001170028	0.000872975	4.45E-05	4.97E-05	0.001085869	0.001021333
TTGAAATACTCTGT	9.70E-05	8.35E-05	0.000175087	0.000149768	4.96E-05	6.44E-05	8.20E-05	0.000118484	7.67E-05	7.19E-05	0.000131103	8.29E-05
GGTGACGGTGTTAT	6.82E-05	6.21E-05	0.000167883	0.000102946	3.49E-05	1.01E-05	5.50E-05	5.57E-05	3.18E-05	3.14E-05	3.07E-05	3.50E-05
GTCAATAAATGAGC	7.73E-05	6.17E-05	4.66E-05	7.90E-05	2.62E-05	2.97E-05	4.59E-05	5.65E-05	1.10E-05	9.89E-06	2.68E-05	1.69E-05
AAATACTGAACATG	0.015737162	0.015126175	0.004619178	0.004101598	0.017959358	0.017623601	0.004578197	0.004977474	0.012946563	0.01250807	0.005829171	0.005791396
TTTATAATATAGTA	0.000512513	0.000441747	4.70E-05	7.51E-05	0.00033725	0.000311415	3.97E-05	4.51E-05	0.00021479	0.000223208	5.82E-05	5.43E-05
TCTGTATAGCAGGT	0.000120026	7.84E-05	1.09E-06	1.10E-06	1.63E-06	2.45E-06	2.24E-06	3.72E-07	2.55E-05	7.04E-05	1.14E-06	3.13E-06
GTGTTGGGTGCGAG	0.000122683	7.31E-05	0.000955175	0.00069201	1.29E-05	1.32E-05	0.000471844	0.00055107	2.97E-05	3.15E-05	0.000327471	0.000326531
GCTTTGAGTTAGGG	2.66E-05	1.41E-05	2.48E-05	2.37E-05	2.70E-06	6.03E-06	5.66E-06	1.28E-05	3.00E-06	6.67E-06	5.77E-06	6.55E-06
CTTTAATGGAGTTG	2.26E-05	2.45E-05	0.000535178	0.000388482	3.01E-05	3.29E-05	0.000361868	0.000315083	4.90E-05	5.38E-05	0.000324659	0.000271137
TGTCGGTCAACAGC	0.00051873	0.000445379	0.00072835	0.001042603	0.000369175	0.000342253	0.000867533	0.001027094	0.000410754	0.000376244	0.000705473	0.000705613
GGTATACCTAGGAA	2.02E-05	3.93E-05	1.84E-05	1.52E-05	8.32E-06	8.81E-06	5.64E-06	4.95E-06	1.01E-06	3.23E-06	5.36E-06	1.17E-06
CAACTAAGAAATAT	2.99E-05	2.61E-05	0.000243302	0.000186425	1.29E-05	9.27E-06	9.23E-05	9.19E-05	8.36E-06	8.54E-06	3.43E-05	2.14E-05
CCTCTCTAGCAGAC	0.000619331	9.06E-05	0.000263505	0.000530761	0.000162926	0.002105374	0.000748845	0.000649907	0.001070683	0.004147097	0.001813912	0.000587356
AGGTTAACTTAATA	0.007510781	0.007268412	0.00410574	0.005546485	0.007436796	0.00730046	0.005497769	0.005210833	0.005569255	0.005836831	0.005452096	0.005154571
ATTTTTAGCAGTGG	2.76E-05	3.26E-05	5.69E-07	1.10E-06	5.16E-06	1.89E-05	1.81E-06	2.59E-06	4.16E-06	7.01E-06	2.76E-07	1.26E-06
GGTGTACGTGGGAC	1.95E-05	5.12E-06	2.42E-05	2.48E-05	3.84E-06	6.03E-07	1.48E-05	7.37E-06	1.10E-06	1.50E-06	4.66E-06	6.12E-06
AATTATGTCAGATG	6.53E-05	4.26E-05	0.00026613	0.000209083	3.51E-05	5.03E-05	0.000167071	0.000170586	6.38E-05	4.56E-05	0.000168296	0.000152994
TTGAAGGGGTCGTG	0.000177007	0.000188892	1.84E-05	4.95E-05	9.31E-05	9.79E-05	2.22E-05	1.20E-05	2.66E-05	2.75E-05	1.01E-05	1.55E-05
TTGACACATTAAAC	2.83E-05	2.40E-05	0.000173902	0.000255037	6.03E-06	1.03E-06	0.000168025	0.00015455	2.49E-06	5.93E-06	9.34E-05	0.000106021
AGGTGGTAGTAGCA	0.001147845	0.001232115	5.80E-05	0.000165283	0.000904752	0.000908867	0.00010859	0.000122745	0.000866586	0.000854219	0.000165547	0.000164062
GGGGGTCGAGAGGT	5.77E-06	1.07E-06	8.20E-06	1.88E-05	3.14E-07	7.13E-06	1.87E-05	1.41E-05	3.25E-07	2.38E-06	9.35E-06	7.34E-06
AGACTCCCAGTGCG	1.06E-06	6.66E-06	1.23E-05	1.01E-05	4.20E-06	6.34E-07	1.34E-05	2.23E-05	4.87E-07	4.86E-07	4.80E-06	2.62E-06
GCGGGCAGAGGCCG	1.52E-05	2.65E-05	3.41E-06	6.89E-06	1.99E-05	1.47E-05	3.11E-06	1.31E-05	3.01E-06	1.11E-05	2.34E-06	2.37E-07
TGGTGGGGGGTACT	0.000261666	0.00017689	3.78E-05	4.51E-05	8.58E-05	0.000107038	3.46E-05	8.25E-05	7.27E-05	7.40E-05	1.91E-05	1.32E-05
GGTAAGGCCAAAAT	4.84E-07	1.60E-06	2.00E-05	2.46E-05	4.05E-07	4.05E-07	6.62E-06	3.22E-06	5.86E-07	5.84E-07	1.07E-06	6.87E-07
GTCGTCGTAAGGCG	5.84E-06	1.07E-06	2.53E-05	2.20E-05	1.46E-07	1.46E-07	1.36E-05	8.08E-06	4.74E-07	4.73E-07	9.47E-07	7.19E-06
GGCAGATGGGGGGC	6.99E-06	3.20E-05	1.83E-05	5.11E-05	1.05E-05	4.32E-06	5.18E-05	1.47E-05	8.73E-06	4.22E-06	2.58E-05	2.76E-05
GAGATATTCGACCA	3.35E-06	1.03E-05	0.00020468	0.000266354	1.03E-06	3.45E-06	0.000158755	0.000196968	8.32E-06	6.69E-08	0.000142317	0.000138519
GGGCAGGGGCCAGG	0.00024123	0.000205538	0.000309839	0.000187364	0.00017374	0.000152965	0.000150066	0.000207189	0.000110709	0.000113575	7.49E-05	0.000100894
GTCGGACCGGCGAA	2.44E-05	5.74E-05	1.67E-05	6.79E-05	2.22E-05	2.63E-05	3.37E-05	1.78E-05	5.60E-06	1.11E-05	1.35E-05	6.63E-06
GATACGACATGTGC	2.87E-05	4.08E-05	1.06E-05	2.80E-05	1.32E-05	2.44E-05	1.53E-06	1.66E-05	1.68E-06	7.34E-06	8.42E-07	4.45E-06
AGGGAAGAAGTGGG	3.30E-05	1.56E-05	4.26E-05	4.88E-05	1.43E-05	7.92E-06	3.60E-05	4.53E-05	3.77E-06	5.61E-06	6.37E-06	7.96E-06
CGGGGGGGGGAAGT	1.06E-06	0.000135859	6.63E-05	0.000511329	0.002872823	1.48E-05	0.00118452	1.04E-06	3.19E-05	4.07E-05	3.88E-05	0.00015266
CCTGTGAAGGATGT	1.83E-05	1.48E-05	4.86E-05	3.10E-05	1.45E-05	1.39E-05	1.60E-05	2.52E-05	3.83E-06	2.55E-06	2.10E-05	1.78E-05
GTAGCTCCTTCGGC	1.99E-05	2.63E-05	1.09E-06	1.10E-06	7.51E-06	1.88E-05	3.04E-05	6.04E-08	5.14E-06	3.88E-06	3.05E-07	3.06E-07
GTTTCTTCCGTGTA	0.00071647	0.000728777	2.16E-05	1.35E-05	0.000615605	0.000696815	3.14E-06	1.43E-05	0.000569051	0.000532599	1.95E-05	3.34E-05
GACAATGGGATGGG	3.93E-06	4.82E-06	7.42E-05	4.83E-05	1.03E-06	5.35E-07	1.49E-05	3.04E-05	2.91E-06	3.08E-07	1.01E-05	7.51E-06
AATGGAACGGGGGC	0.000127791	9.94E-05	2.83E-06	1.08E-05	5.42E-05	4.95E-05	4.83E-06	8.65E-06	4.08E-05	2.46E-05	5.99E-06	6.16E-06
TGGTCCCGCATAGG	5.57E-05	6.38E-05	0.00017199	9.92E-05	3.54E-05	3.11E-05	3.22E-05	4.31E-05	1.59E-05	1.23E-05	1.55E-05	1.19E-05
GGGAGGGGTGGTAA	3.68E-05	3.21E-05	0.000397218	0.00033902	8.76E-06	3.03E-05	0.000205771	0.000197388	6.61E-06	3.29E-05	0.000154056	0.000150232
ATAGCTTTCAGTTG	1.80E-05	2.78E-06	0.000244122	0.000173889	1.15E-05	3.61E-06	0.000118625	0.000114922	3.61E-06	9.18E-06	5.97E-05	6.59E-05
GGCCGCTCTGGCGG	1.06E-06	0.000173855	0.003046942	0.003489234	8.22E-05	0.000156082	0.004096698	0.001451826	0.00030546	0.000358252	0.005071195	0.004791385
AGCTGAACATTCAC	6.43E-07	2.54E-06	4.70E-05	5.26E-05	1.03E-06	1.03E-06	3.73E-05	4.08E-05	7.14E-07	1.98E-06	2.41E-05	1.81E-05
TCATTATCCTGGTT	1.06E-06	2.81E-06	3.00E-05	1.89E-05	2.90E-06	1.30E-07	1.56E-05	6.75E-06	4.90E-07	1.45E-06	2.50E-06	4.72E-06
TCGGCATGGTAGAG	1.06E-06	1.07E-06	9.45E-05	7.11E-05	1.77E-07	3.28E-06	4.06E-05	2.87E-05	6.64E-07	2.17E-06	1.08E-05	1.58E-05
GGCTGAACAGGGCG	0.000145215	0.000115227	7.10E-06	7.99E-06	6.39E-05	5.82E-05	5.86E-06	5.49E-06	3.12E-05	2.67E-05	5.13E-06	3.63E-06
ACGTTGAAGGTGTG	9.24E-06	4.45E-06	3.71E-06	1.05E-05	2.58E-07	2.59E-07	6.20E-06	1.03E-05	4.78E-07	4.77E-07	6.00E-06	1.92E-06
ACTATCTAGTGTTT	0.000358222	0.000326713	0.000171163	0.000141255	0.000197098	0.000215004	9.79E-05	0.000153019	0.00010453	0.000112757	0.000112982	9.41E-05
TGCTGGAGCTTTTT	6.42E-06	5.61E-06	0.000189425	0.000154356	2.70E-06	7.01E-07	4.30E-05	4.46E-05	8.66E-06	2.61E-07	8.30E-06	1.18E-05
GTATATGGGGGGGT	0.000191359	0.000171766	2.41E-05	6.20E-05	6.56E-05	3.62E-05	2.73E-05	3.68E-05	1.66E-05	1.76E-05	7.25E-06	1.20E-05
CGCCACGCGGGCGG	1.06E-06	8.55E-05	0.000148679	0.000420575	2.61E-05	1.36E-05	0.000292417	6.27E-05	2.09E-05	3.38E-05	0.000187537	0.000181833
CATTCTAGTTCCCT	0.000193854	0.000162641	0.00103233	0.000850368	0.00013196	0.000131884	0.000730644	0.000811796	0.000196999	0.000173339	0.00066505	0.000601267
GACTAGTGGGGGAA	0.000997985	0.006985579	0.000460567	0.002532087	0.00620516	0.003639931	0.003888829	0.000643848	0.004588501	0.007655433	0.004603799	0.004836095
TGATGGGCGGCGGA	0.000197704	0.000417532	0.000118801	0.00027908	5.73E-07	1.38E-05	6.59E-07	1.10E-06	4.44E-06	5.42E-07	2.58E-06	1.52E-06
CTGGTCCCAGACAC	1.06E-06	5.69E-06	3.29E-05	0.000260108	1.15E-05	1.03E-06	0.000302143	1.01E-05	6.55E-07	1.09E-06	6.46E-05	0.000101376
TCGAATTCCCTTTT	3.60E-06	5.98E-07	3.45E-05	2.38E-05	1.67E-06	6.00E-07	1.24E-05	9.99E-06	5.14E-07	5.13E-07	2.87E-06	2.97E-06
CTTCCTAGCTATAT	5.46E-06	8.26E-06	2.51E-06	1.15E-05	1.24E-06	4.63E-06	4.77E-06	2.83E-06	1.24E-06	1.68E-06	3.85E-07	2.42E-06
GAGATAAAGAGCAG	1.29E-05	3.58E-05	2.28E-06	5.77E-06	1.40E-05	5.18E-06	1.62E-06	1.73E-07	2.40E-06	7.38E-06	2.95E-07	3.98E-07
GGTCCAATGACAGA	0.000144865	8.71E-05	0.000186412	0.00023897	4.38E-05	2.43E-05	0.000122414	0.000142044	2.97E-05	4.05E-05	4.19E-05	3.86E-05
TTCGGTGGCTGTAA	0.00064421	0.000955284	0.000766849	0.000905197	0.000604654	0.000549277	0.000726395	0.000506494	0.000445516	0.000462934	0.000479427	0.000430238
ATTTGCGGCGGTTA	4.20E-06	1.07E-06	8.40E-06	1.58E-05	9.00E-06	2.99E-07	1.14E-05	3.11E-06	4.79E-06	6.37E-06	5.63E-06	5.83E-06
TTACTCTCTATCCT	1.82E-05	5.57E-06	0.000178587	0.000112974	1.03E-06	1.03E-06	8.31E-05	0.000101285	6.41E-08	5.93E-08	5.26E-05	5.48E-05
AATATGTATTTAGC	0.000249284	0.000232094	4.71E-05	8.84E-05	9.66E-05	9.73E-05	3.32E-05	2.98E-05	1.93E-05	2.16E-05	1.29E-05	7.54E-06
AGGGTAGGGGGTGA	1.06E-06	1.07E-06	5.35E-05	6.57E-05	1.03E-06	2.31E-05	3.42E-05	2.95E-05	8.02E-06	1.02E-06	2.24E-05	3.47E-05
AAACCTTCAACCGC	2.73E-06	3.22E-06	2.88E-05	4.19E-05	1.03E-06	8.71E-07	1.10E-05	2.39E-05	2.68E-07	1.07E-06	7.20E-06	1.28E-05
ATTAGTAGGAGGAC	1.06E-06	4.43E-06	5.67E-05	7.14E-05	2.06E-06	1.87E-06	3.75E-05	6.63E-05	9.83E-06	1.94E-06	3.16E-05	3.27E-05
CACGAGTCGGTGAC	0.000195574	0.000199273	0.001492106	0.002211657	0.000133868	0.000141854	0.002455801	0.002710006	0.000433815	0.000337955	0.002574019	0.002390042
TGTCGGCTGGTCGG	7.20E-06	5.16E-06	9.90E-05	5.47E-05	1.03E-06	3.13E-06	2.00E-05	4.14E-05	9.47E-08	1.13E-06	2.03E-05	9.64E-06
TTCTAGCTTCCAGG	1.91E-05	5.27E-06	0.000182004	0.000111915	6.35E-06	3.41E-07	6.29E-05	5.10E-05	1.02E-06	7.15E-06	4.00E-05	4.44E-05
TGCGGGAAAGCTCG	0.000215832	0.000346533	0.004054945	0.004963928	0.000308311	0.000353984	0.00657791	0.003728849	0.000763295	0.000583437	0.004723377	0.005624541
CTGGGATGGGTTGG	1.06E-06	1.62E-05	0.000474367	0.00041554	1.41E-05	8.70E-06	0.000379534	0.000104962	1.03E-05	2.05E-05	0.000278428	0.000283535
CGACTTTTACCGTT	6.58E-06	4.92E-06	1.16E-05	1.94E-05	3.61E-07	3.45E-06	4.37E-06	7.39E-06	4.87E-07	4.86E-07	6.00E-06	1.39E-06
TTGATACGTTAATA	6.32E-05	6.06E-05	1.09E-06	1.10E-06	5.40E-05	4.17E-05	1.04E-06	1.04E-06	3.32E-05	2.21E-05	1.04E-06	7.53E-06
TGGTCTATGACTAT	1.06E-06	1.98E-06	3.74E-05	2.00E-05	3.15E-07	3.15E-07	6.54E-06	7.43E-06	4.33E-07	4.32E-07	6.85E-06	3.68E-06
CTCCAAAGTGCCGG	2.37E-07	2.52E-07	1.17E-05	2.24E-06	5.64E-07	5.65E-07	9.20E-07	1.60E-06	3.86E-07	3.84E-07	7.81E-06	5.44E-06
AGGCCATTACGCCG	0.000147882	0.000197913	9.57E-05	0.000108234	2.89E-06	3.68E-06	6.78E-07	5.60E-07	5.82E-07	5.80E-07	5.86E-07	1.39E-06
TCATTACCCATGCT	0.001732173	0.000376091	0.001511577	0.001631481	0.000992106	0.007902248	0.00127215	0.002813001	0.002796593	0.013041156	0.003424166	0.003936793
ACCTATAGGTCACG	2.05E-05	1.87E-06	7.24E-05	0.000131887	6.63E-06	2.66E-06	7.81E-05	7.91E-05	2.06E-08	2.18E-06	4.51E-05	5.55E-05
ACCGTAGGATATGT	0.000443201	0.000371702	0.000291561	0.000217825	0.000334116	0.000285151	0.000126305	0.00016287	0.000233032	0.000201365	0.000107816	0.000122714
CAACACGCACGCAC	5.31E-05	5.67E-05	5.22E-06	3.56E-06	5.38E-05	4.78E-05	4.01E-06	3.50E-06	3.54E-05	2.97E-05	5.85E-07	1.07E-06
CGGGTCTGGGAGCG	1.06E-06	1.36E-05	3.96E-06	9.61E-05	6.06E-05	1.03E-06	0.001040803	7.15E-06	8.21E-06	7.07E-06	8.94E-06	2.19E-07
GGCCGAGAGTTCGT	1.41E-05	1.26E-05	1.09E-06	3.20E-06	1.03E-05	1.07E-06	2.74E-07	2.76E-07	1.24E-05	6.79E-06	1.71E-07	1.72E-07
ACACTAGAATTGGT	5.56E-05	3.04E-05	1.09E-06	1.10E-06	1.08E-05	1.11E-05	5.83E-06	8.44E-06	1.07E-05	6.61E-06	1.94E-07	3.81E-06
GAGGACATTCTGGT	8.63E-06	1.07E-06	0.000179722	0.000124275	1.03E-06	1.28E-06	7.90E-05	9.71E-05	1.02E-06	1.02E-06	2.21E-05	3.97E-05
GGCTGATGATCGTG	8.14E-07	1.07E-06	2.21E-05	8.74E-05	1.03E-06	1.03E-06	6.88E-05	4.40E-05	9.64E-06	7.92E-07	1.66E-05	2.13E-05
CCGTTAAGAGCCTT	0.000133904	0.0001266	9.45E-05	0.000136547	5.36E-05	8.06E-05	5.35E-05	5.71E-05	4.06E-05	3.70E-05	2.41E-05	2.73E-05
CGCTATACAAGAAC	4.07E-05	2.55E-05	0.00029721	0.000329891	2.26E-06	1.91E-05	0.000300839	0.000331203	2.43E-05	3.25E-05	0.00024957	0.000268791
GTTTGTCCTAATAC	1.06E-06	1.07E-06	4.24E-05	5.37E-05	5.19E-08	1.03E-06	3.13E-05	2.23E-05	3.10E-06	3.38E-07	9.22E-06	6.63E-06
CTGAAAATACCTAA	3.63E-06	1.61E-06	4.60E-05	2.63E-05	4.31E-07	1.90E-06	3.90E-05	1.87E-05	1.27E-06	2.01E-06	1.84E-05	1.05E-05
ATTCACTCGCGCCT	1.13E-05	1.38E-05	1.27E-05	1.02E-05	8.90E-06	1.86E-06	3.34E-06	1.12E-05	4.74E-06	1.24E-06	8.82E-07	4.32E-06
TTTTCACGTTATGG	1.06E-06	4.51E-06	0.000105113	9.41E-05	1.03E-06	6.58E-06	5.06E-05	3.22E-05	6.81E-06	6.31E-06	3.58E-05	3.53E-05
GAAGAATTAGAGTT	5.91E-06	1.27E-05	8.03E-05	0.000114302	8.55E-07	2.01E-06	7.66E-05	9.08E-05	9.73E-06	5.42E-06	3.91E-05	4.92E-05
GTGTGCCCTACAAC	5.58E-05	3.11E-05	0.000377062	0.000545432	2.58E-06	1.03E-06	0.000471356	0.000529741	3.13E-05	8.67E-06	0.000295156	0.00028622
GCTTTCCGGGCGGA	0.000848214	0.000885796	3.40E-05	5.15E-05	0.000634416	0.000678859	4.89E-05	4.66E-05	0.000571269	0.000489278	6.42E-05	0.00010304
TTTTTGGGTATAGA	8.17E-06	7.57E-06	3.25E-05	4.55E-05	3.78E-06	2.21E-06	1.63E-05	1.71E-05	4.38E-07	2.18E-06	2.13E-06	8.05E-06
GTCAGACCGCTACA	0.000520757	0.000536888	0.002733512	0.00358398	0.000358686	0.00033962	0.002997601	0.003187171	0.000549791	0.000544251	0.002360355	0.002400123
GGAATCACACCGCG	3.25E-05	2.05E-05	3.20E-05	3.09E-05	6.90E-06	1.56E-05	4.55E-06	6.49E-06	1.23E-06	8.43E-07	2.14E-06	1.38E-06
ATAGAGGATTTGGT	0.000495347	0.000458131	0.000385435	0.000393157	0.000343703	0.000365032	0.000378158	0.000400008	0.000311567	0.000317288	0.000425484	0.000405126
GCTAAATAGAAGTT	2.01E-05	1.06E-06	3.06E-05	5.82E-05	1.03E-06	1.43E-06	5.44E-05	5.46E-05	2.55E-06	5.70E-06	1.84E-05	2.94E-05
ATACGAATTTCCCC	1.97E-05	1.10E-05	3.43E-05	4.38E-05	8.11E-06	8.68E-06	1.92E-05	2.24E-05	5.40E-06	1.69E-06	3.87E-06	9.40E-06
AGAGAAAAGGCACC	0.001135658	0.000993694	0.001487067	0.001889051	0.000803789	0.000814056	0.001930554	0.002188032	0.000977391	0.000914233	0.001632911	0.001617345
GTTGTAGGGAGTCT	0.00035492	0.000406934	2.38E-05	5.93E-05	0.000211556	0.000246171	2.21E-05	4.41E-05	0.000109161	0.000125653	7.84E-06	2.52E-05
GGTCATAGCTATGC	5.13E-06	1.41E-07	4.31E-06	1.29E-05	3.34E-07	3.34E-07	5.00E-06	8.08E-06	5.54E-07	3.08E-06	1.27E-06	2.24E-06
GCTTGCGTTGTTGA	2.59E-07	2.73E-07	9.15E-06	4.13E-06	4.96E-07	4.96E-07	3.73E-06	1.93E-06	5.78E-07	5.77E-07	9.47E-07	1.21E-06
CGTAGGAGGGTGCG	7.78E-06	1.07E-06	9.67E-06	2.10E-05	3.56E-07	3.56E-07	4.32E-06	7.75E-06	4.35E-07	4.34E-07	8.65E-06	1.74E-06
AGGCGTAGGTGGGG	1.06E-06	1.07E-06	0.000910501	0.000637915	1.03E-06	1.03E-06	0.000436348	0.000432527	1.02E-06	1.02E-06	0.000328804	0.000369656
GGTTCAGAGGCGCG	1.65E-06	4.48E-07	2.01E-06	5.71E-06	5.03E-07	5.03E-07	2.11E-06	3.22E-06	5.81E-07	5.79E-07	8.27E-07	1.21E-06
CGTGCGGTGTTCAG	3.24E-06	6.61E-06	4.90E-05	2.77E-05	1.79E-06	1.03E-06	1.62E-05	1.39E-05	9.28E-07	4.16E-07	5.64E-06	5.78E-06
TTGAGGGGTGGAGA	4.47E-06	4.22E-06	8.00E-05	9.31E-05	1.03E-06	2.23E-06	4.27E-05	6.99E-05	3.65E-06	9.10E-07	3.31E-05	2.52E-05
TTCTAAGTCGAGCG	1.06E-06	6.00E-06	2.60E-05	3.85E-05	2.65E-06	3.54E-06	1.78E-05	2.45E-05	4.07E-06	1.41E-06	1.22E-05	1.28E-05
AAAGGGAGTCTTTA	0.000166334	0.000158073	1.99E-05	1.31E-05	6.25E-05	8.19E-05	1.47E-05	1.46E-05	4.32E-05	6.25E-05	5.46E-06	1.07E-05
CATTTCCGGGGCTG	3.28E-05	1.07E-06	9.09E-05	4.73E-05	1.26E-05	8.62E-06	2.88E-05	3.01E-05	4.30E-06	6.84E-07	2.24E-05	2.63E-05
AGGGTGTGAACGAC	3.30E-05	2.89E-05	1.32E-06	6.15E-07	7.44E-06	1.58E-05	1.99E-06	1.63E-06	1.04E-05	7.36E-06	3.62E-06	4.67E-07
CTGCTCTACATCAC	1.06E-06	9.25E-06	4.08E-05	8.69E-05	4.38E-07	4.79E-08	5.85E-05	2.91E-05	9.23E-06	1.02E-06	5.05E-05	3.89E-05
GCCCTAACTGCCTA	0.001420036	0.001389024	0.000249882	0.00025576	0.001277079	0.001260275	0.000261409	0.000273534	0.001219494	0.0012262	0.000296828	0.000327052
TCTGGATTTTAAGT	5.38E-06	1.07E-06	1.68E-05	1.52E-05	2.57E-09	2.72E-09	1.24E-05	1.58E-05	4.45E-07	5.30E-06	7.51E-06	2.21E-06
CGCTGGCCCTGTTG	0.000343992	0.000315684	0.001115542	0.000924256	0.000227726	0.000228352	0.000883035	0.000970617	0.00031223	0.000264326	0.000904175	0.000972683
GAGCCGGTAGAAGC	2.20E-05	9.23E-06	0.000103957	0.000135489	1.03E-06	4.44E-06	8.12E-05	0.000119625	2.92E-06	3.85E-06	2.14E-05	3.29E-05
ATGTATCAAAAAAT	2.45E-05	1.92E-05	0.000143908	0.000143333	1.38E-05	3.44E-06	0.000104385	0.000131727	3.04E-06	4.38E-06	6.82E-05	6.21E-05
TCAGTTATCCCATA	0.014368073	0.015814987	0.003865187	0.004913297	0.020497449	0.019235319	0.007285513	0.007741675	0.02178234	0.022769009	0.010517778	0.010745095
CTAATGCCATGGAT	0.000517123	0.000481088	0.000513946	0.00047271	0.000370052	0.00033093	0.000442495	0.00050394	0.00032248	0.000294215	0.000400866	0.00037682
GCAGGCCGTCAGTG	1.46E-05	1.39E-05	0.000144372	0.000292153	6.55E-06	1.03E-06	0.000210478	0.000178738	2.21E-05	1.58E-05	0.00013628	0.000118092
ATCGGTCCAGATTT	2.99E-05	2.43E-05	8.29E-05	0.000130883	1.95E-05	1.20E-05	6.64E-05	5.88E-05	1.79E-05	1.73E-05	7.05E-05	5.54E-05
CAGGCCGGGTGGTC	0.000104974	0.000456753	1.29E-05	1.68E-06	0.000319578	0.000249022	1.47E-05	1.04E-06	0.000134364	0.000106259	9.70E-06	9.47E-06
AGGTCAAGGGGGAG	1.18E-05	5.03E-05	7.58E-06	2.90E-05	2.83E-05	1.41E-05	2.75E-05	3.30E-06	1.65E-05	2.62E-05	3.72E-05	2.32E-05
TACGGAAGGTGACC	4.53E-06	1.20E-06	8.34E-05	0.000117832	5.88E-06	6.49E-06	7.21E-05	5.45E-05	9.58E-07	6.14E-06	4.08E-05	4.28E-05
GTTCTCTCGGTGCC	1.59E-05	1.71E-05	0.000180692	0.000251543	9.84E-08	7.08E-06	0.000190895	0.000183259	1.70E-05	1.35E-05	0.000125204	7.90E-05
AAAAATCGTCTGTG	6.88E-08	1.40E-06	1.02E-05	9.02E-06	3.56E-07	3.56E-07	4.32E-06	7.75E-06	1.89E-06	5.70E-07	1.53E-06	1.02E-06
GACCTGATTTCCCT	0.001443023	0.001324476	0.000878296	0.000829241	0.001462261	0.00131269	0.001069986	0.001191118	0.00167024	0.001539156	0.001138296	0.001172132
AATGGCGATAGGCG	2.21E-05	0.000113904	4.65E-06	9.06E-06	0.000111281	9.44E-05	1.06E-05	1.04E-06	6.67E-05	3.57E-05	1.65E-05	1.69E-05
CATTATGTTACAGG	3.22E-06	1.69E-06	4.02E-05	2.25E-05	6.39E-06	6.86E-06	5.08E-06	2.51E-05	6.32E-06	4.92E-07	4.00E-06	2.90E-06
GAATGGATTACGGG	7.45E-05	7.27E-05	3.89E-06	1.10E-06	3.28E-05	2.27E-05	1.13E-06	2.50E-06	1.27E-05	1.33E-05	8.05E-08	8.13E-08
TGTTATACTGCACT	0.00150205	0.001386474	0.001249781	0.000981987	0.000999676	0.001141799	0.001151524	0.001221166	0.001720204	0.001621022	0.001095705	0.001024157
TCTTAGTAAGACCT	2.12E-06	1.07E-06	5.29E-05	5.25E-05	3.53E-07	1.03E-06	1.67E-05	2.75E-05	1.02E-06	2.54E-06	1.80E-05	1.89E-05
GGTTAACGCTGTGG	1.50E-05	2.45E-05	6.56E-05	2.87E-05	8.41E-06	7.13E-06	1.79E-05	1.47E-05	1.86E-06	3.23E-06	6.43E-06	6.61E-06
TCAGCATGTAGTGT	2.67E-06	1.26E-05	8.29E-08	4.72E-06	2.85E-06	1.80E-06	4.95E-06	2.20E-06	5.71E-06	1.37E-06	1.35E-06	3.42E-06
ATTTCAAATAACAT	2.83E-06	9.36E-06	3.42E-05	3.32E-05	5.76E-06	1.03E-06	2.09E-05	1.67E-05	4.34E-06	4.47E-07	2.22E-06	7.32E-06
TGCGGGGTATGGGG	2.82E-06	4.81E-06	2.98E-05	1.56E-05	2.22E-06	2.09E-07	1.33E-05	5.46E-06	4.38E-07	3.17E-06	3.56E-06	6.63E-06
GGACGCGCGGGGGC	1.06E-06	8.40E-07	1.06E-05	2.28E-05	3.42E-06	1.03E-06	3.26E-05	4.80E-06	1.67E-06	4.81E-07	1.31E-05	1.12E-05
CACGTTGACGATGT	0.000123128	7.59E-05	0.000338005	0.000267338	4.84E-05	5.75E-05	0.000174063	0.000257674	4.12E-05	4.73E-05	0.000161114	0.000143605
GGGTTGTTTGGGTG	4.55E-06	1.14E-05	0.000324437	0.000198263	1.59E-06	1.53E-06	0.000152195	0.000136741	1.20E-05	5.72E-06	0.000149663	0.000122748
GTTGCCAGACGTCC	6.16E-07	3.23E-06	1.03E-05	7.45E-06	1.16E-06	5.59E-07	1.51E-06	1.27E-06	5.84E-07	5.83E-07	1.31E-06	5.11E-07
TGAAGACGCGCCGT	1.41E-05	1.07E-06	4.78E-05	4.54E-05	2.71E-07	1.03E-06	1.88E-05	1.62E-05	3.81E-07	1.42E-06	1.07E-05	2.78E-06
CCTCTGGAGATGGT	1.06E-06	5.68E-06	5.25E-05	6.06E-05	4.89E-06	7.98E-07	5.78E-05	8.01E-05	3.68E-06	4.50E-06	4.52E-05	4.84E-05
TCACAATCCAGTCG	0.000830204	0.000733404	0.000185929	0.000140976	0.000623336	0.000639765	8.60E-05	0.000112923	0.000547179	0.000503314	0.000113989	0.000151315
AGTCGACTGGGCAG	2.84E-06	5.33E-06	3.38E-05	4.08E-05	5.29E-06	1.03E-06	1.71E-05	1.61E-05	1.26E-06	4.22E-07	3.34E-06	7.71E-06
GAGGCGCGCGGTGT	0.000557621	0.000645713	1.96E-05	1.88E-05	0.000481205	0.000534742	2.13E-05	1.04E-06	0.0003863	0.000389315	4.20E-05	2.58E-05
TGGGCCCTCGTCCG	3.57E-05	5.06E-05	2.46E-05	1.64E-05	6.54E-06	7.94E-06	9.16E-06	1.42E-06	6.69E-06	4.84E-06	3.70E-06	2.71E-07
GGGCTCACGATACT	2.03E-05	4.86E-05	2.33E-08	6.30E-06	8.20E-05	3.98E-05	3.48E-06	2.91E-06	4.40E-05	4.72E-05	1.04E-06	1.04E-06
TGTTCTAGGCTAGG	0.000115488	0.000121737	4.09E-05	1.68E-05	2.84E-05	1.65E-05	2.46E-06	3.28E-06	1.17E-05	5.39E-07	1.04E-06	3.00E-06
TTTGAATTCTTTGT	2.27E-06	1.89E-06	6.98E-06	1.09E-05	4.60E-07	4.61E-07	2.45E-06	4.84E-06	9.50E-07	4.38E-07	3.83E-06	6.31E-06
GATCAACTTGTGTG	1.06E-06	1.31E-07	8.92E-05	6.51E-05	1.35E-06	1.03E-06	3.02E-05	6.73E-05	3.95E-07	5.36E-06	2.39E-05	2.73E-05
GCACGTGTGCGACG	0.000293143	0.000228482	0.000706066	0.000603524	0.000209175	0.00022613	0.000349592	0.00048908	0.000173628	0.000162957	0.00024178	0.000276702
GCCGGAGGAACGCG	1.41E-05	2.27E-05	0.000366006	0.000310869	1.85E-06	4.81E-06	0.000206531	0.000216585	1.14E-05	4.76E-06	0.000147164	0.000105718
GTCAGATCCTGGTG	7.80E-06	1.82E-06	4.12E-05	4.89E-05	3.57E-06	1.03E-06	2.25E-05	1.22E-05	1.86E-06	5.42E-07	2.62E-06	1.55E-06
AATGGTTTAGGGTT	0.00013701	7.47E-05	0.000253905	9.08E-05	3.50E-05	3.27E-05	0.000208058	0.000145235	0.000129826	0.000145864	0.000173129	0.000309531
ATGTGTCCTCTGAT	0.000193792	0.000215313	0.000273555	0.000280782	0.000141027	0.000153155	0.000230834	0.000263229	0.000104647	8.31E-05	0.000194563	0.000191676
TGCCGCGTTTATGA	8.22E-08	9.53E-08	5.32E-06	1.36E-05	5.14E-07	5.14E-07	3.56E-06	1.28E-06	5.27E-07	5.26E-07	1.79E-06	3.33E-06
CTTTTTGTCGGGTC	2.34E-05	9.62E-05	1.09E-06	4.06E-05	8.42E-05	8.92E-05	2.87E-05	2.53E-06	6.86E-05	6.17E-05	4.25E-05	4.85E-05
GATTTCTAGAGTTA	0.00217889	0.001825097	0.000775545	0.000880899	0.001617552	0.001438963	0.000793462	0.000827402	0.001503056	0.001438041	0.000822852	0.000791376
TTCTGTCTCTTAGG	0.000760376	0.000665183	0.000914051	0.000671566	0.000521679	0.000504175	0.000606677	0.000757092	0.000642643	0.000525461	0.000653149	0.000694628
GGTGCTAAATAGCG	0.000319741	0.000413339	4.39E-06	0.000400257	0.000249997	0.000234216	0.000272399	0.000200172	0.00014847	0.000134869	0.000216999	0.0002122
TTTGTCAATCGAAT	0.002145549	0.002611347	0.000178147	8.83E-05	0.002832505	0.002786704	6.87E-05	7.64E-05	0.002633801	0.002445986	0.000214585	0.000162226
GAGCGGACATGGTT	9.13E-05	7.48E-05	0.000205315	0.000173513	2.34E-05	2.30E-05	0.000101033	0.000112252	2.81E-05	1.67E-05	4.55E-05	5.85E-05
AGAAGCTATCCCTA	0.000114833	0.000111782	0.000206283	0.000218008	4.04E-05	4.08E-05	0.000104581	8.85E-05	1.53E-05	1.63E-05	3.49E-05	4.47E-05
GCTCGGGGAGTGAG	1.84E-06	6.66E-07	5.34E-05	3.81E-05	3.44E-06	1.03E-06	1.87E-05	1.74E-05	4.51E-07	1.33E-06	7.56E-06	1.91E-06
TCGGCCTCCCTGCA	5.77E-05	6.75E-05	9.29E-06	1.05E-05	2.65E-05	4.44E-05	2.96E-06	7.79E-06	1.57E-05	1.23E-05	3.36E-06	6.83E-07
GGGCCTGAAGTTAT	1.06E-06	1.07E-06	1.38E-05	1.00E-05	4.46E-07	4.46E-07	4.75E-06	3.22E-06	3.95E-07	3.93E-07	8.53E-06	4.20E-06
TGAATGCTCACAGC	1.06E-06	1.07E-06	1.90E-05	2.19E-05	2.79E-08	2.81E-08	1.51E-05	1.20E-05	4.18E-07	4.16E-07	9.50E-06	1.92E-06
GAAGTGGTCTTTGG	0.000295794	0.000234987	0.000237807	0.000177051	0.000161859	0.000130827	9.56E-05	0.000112866	8.38E-05	8.90E-05	4.62E-05	4.67E-05
ATCTTGGTATAAGG	0.000198001	0.000144564	5.88E-05	4.28E-05	8.75E-05	8.14E-05	4.06E-05	3.79E-05	5.39E-05	5.32E-05	1.65E-05	9.12E-06
TGGTGTAAAGTGCG	0.000152335	0.000157829	4.20E-05	4.51E-05	8.61E-05	0.000148372	3.60E-05	3.50E-05	5.19E-05	7.59E-05	1.86E-05	2.22E-05
ATGTGAGGTAGATG	0.000382042	0.000277765	0.00247069	0.001573487	0.000296065	0.000229773	0.001475764	0.001632669	0.000493516	0.000434455	0.001115829	0.001172209
TTAATTTGGTCTGA	0.000526222	0.000411753	0.000830708	0.000876228	0.000469185	0.000548971	0.000826246	0.000962859	0.000495553	0.000445131	0.000900596	0.000918304
GCGTTTCTTACTGC	2.47E-05	2.23E-05	0.000261912	0.000310493	5.29E-06	2.01E-06	0.000268232	0.000273166	1.84E-05	1.32E-05	0.000167381	0.000190234
TCATCGAGGGGAGG	1.33E-06	1.47E-06	4.06E-05	2.22E-05	1.03E-06	1.03E-06	1.56E-05	1.97E-05	1.02E-06	3.35E-06	1.09E-05	4.51E-06
AGGCGGCAGGTAGT	1.87E-06	8.45E-07	1.02E-05	5.30E-06	2.47E-06	4.60E-07	4.72E-06	2.55E-06	5.15E-07	5.14E-07	1.43E-06	4.38E-06
ACGGGTGGGAGCGT	0.000178098	0.000104219	0.001064371	0.000773374	6.10E-05	5.48E-05	0.000516619	0.00062395	6.11E-05	6.05E-05	0.000292156	0.000277057
ACACCGGTGTCAAA	3.64E-05	2.60E-05	0.000401937	0.000483363	2.39E-06	5.02E-06	0.000373508	0.000433919	3.54E-06	8.37E-06	0.000233676	0.000266051
GGATCAATAAGGAG	3.08E-06	2.45E-06	3.20E-06	3.82E-06	3.18E-06	4.16E-07	8.83E-07	8.36E-06	1.11E-06	3.37E-06	3.65E-07	3.66E-07
TTTCGGGGGCTCTA	2.86E-06	2.65E-06	3.99E-05	4.18E-05	2.94E-06	1.03E-06	1.28E-05	2.07E-05	2.14E-06	4.95E-07	3.33E-06	3.48E-06
TGGTTCTCCGAGTG	2.78E-05	3.03E-05	1.07E-06	1.55E-05	1.46E-05	1.07E-05	1.81E-05	1.00E-05	1.45E-05	4.39E-06	7.93E-06	8.54E-06
GGCCACAATAACGA	0.000106874	0.00011214	8.50E-05	8.91E-05	4.25E-05	5.22E-05	4.34E-05	7.61E-05	3.13E-05	1.39E-05	4.58E-05	2.52E-05
TGGAGTTCCGACCA	0.000682125	0.000784125	0.000101099	0.000113339	0.000659013	0.000620875	9.40E-05	9.55E-05	0.000500536	0.000460318	0.000107614	0.000100821
TTAAATCTATCGAT	0.000508551	0.000523185	4.48E-05	4.89E-05	0.000208805	0.000241216	9.06E-06	1.96E-05	0.000108754	9.83E-05	1.23E-05	7.81E-06
GTCCGTAGGCCGGG	0.000287253	0.000245558	0.000160114	0.000105126	0.000191185	0.000228846	0.000111639	9.95E-05	0.000141448	0.000159657	4.88E-05	4.29E-05
TGAAGATTGAAGCG	2.93E-05	2.97E-05	9.74E-06	2.00E-05	9.37E-06	9.38E-06	4.34E-06	1.01E-05	2.46E-06	7.40E-06	2.15E-06	4.09E-06
GGCGTGCTAGAGGC	1.06E-06	1.07E-06	7.49E-05	0.000123278	1.02E-05	1.46E-05	3.43E-05	2.65E-05	3.30E-06	4.58E-06	2.17E-05	1.99E-05
TGGGCGATACGGGA	2.41E-06	1.07E-06	1.48E-05	2.12E-05	2.26E-07	2.26E-07	8.32E-06	9.70E-06	1.67E-06	3.36E-06	1.00E-05	4.85E-06
CTGGTTATTCTAAT	1.06E-06	3.32E-05	0.000488683	0.001005103	4.41E-05	2.15E-07	0.001246861	0.000133618	1.04E-05	3.42E-06	0.000833362	0.001011611
TTGGAATGGTGCGC	2.96E-07	3.10E-07	5.24E-06	6.87E-06	1.12E-06	1.32E-06	1.41E-06	3.20E-06	5.46E-07	1.15E-06	2.62E-06	1.38E-06
TAGTATACCAATAC	3.44E-05	1.90E-05	0.000189603	0.000294858	7.71E-06	8.92E-06	0.000219666	0.000214827	1.76E-05	9.95E-06	0.000173578	0.000176574
TACTTCTTAAGCCT	5.24E-05	4.96E-05	0.000177493	0.000121309	1.97E-05	2.15E-05	3.75E-05	6.32E-05	1.58E-05	1.95E-06	1.35E-05	2.09E-05
AGGCCCGGGTAGTA	2.32E-06	3.75E-08	8.62E-06	7.67E-06	4.31E-07	4.31E-07	3.81E-06	4.84E-06	5.55E-07	5.53E-07	1.79E-06	1.74E-06
GTGCTGCGCTGGCG	4.61E-07	6.27E-06	7.80E-07	5.78E-06	5.54E-06	3.28E-06	4.22E-06	3.08E-07	5.69E-07	2.79E-06	1.28E-06	1.36E-06
GGGGCAAAGAAGGG	3.85E-05	0.000198341	1.09E-06	1.72E-06	0.000120062	6.73E-05	3.17E-07	4.23E-07	5.08E-05	6.01E-05	2.63E-06	2.75E-06
GGGGTTGGTAGCCA	2.62E-06	3.39E-05	2.46E-05	7.84E-05	1.03E-06	5.55E-06	0.000105904	9.27E-06	2.50E-06	9.54E-06	6.86E-05	8.37E-05
GTCCGGGGGCACAG	2.16E-05	2.15E-05	8.78E-05	4.38E-05	5.30E-06	3.62E-06	1.25E-05	1.61E-05	1.90E-06	1.37E-06	1.02E-05	1.03E-05
GAGGACTGGGGCAG	0.000263761	0.000283898	1.09E-06	1.10E-06	0.000180113	0.000140161	1.04E-06	0.000168859	0.000121103	0.000144853	1.04E-06	1.04E-06
CACAGGCAATGGGC	3.62E-05	1.24E-05	9.05E-05	0.000132615	3.52E-06	1.20E-05	7.20E-05	6.38E-05	6.61E-06	6.31E-06	4.34E-05	3.00E-05
GGTCTTGAGACGTA	4.25E-05	3.86E-05	0.000333799	0.000408735	1.55E-05	3.40E-05	0.00038436	0.00040682	4.18E-05	5.28E-05	0.000306086	0.000333131
GCCCGAAAGATAGC	6.02E-06	1.67E-05	6.17E-05	0.000106671	6.22E-06	3.25E-06	5.14E-05	6.42E-05	1.15E-05	3.56E-06	3.84E-05	3.23E-05
CGAGTCTAAGGTGT	9.71E-05	5.66E-05	1.09E-06	1.81E-06	4.17E-05	4.78E-05	5.11E-07	1.40E-06	5.86E-05	5.36E-05	8.15E-06	1.04E-06
GGGTTCTAGGCAGG	1.06E-06	1.07E-06	2.95E-05	5.17E-06	1.03E-06	5.19E-06	0.000182875	3.72E-06	1.10E-05	4.89E-06	4.05E-06	0.00015114
GCCGACCTTAAAAA	6.71E-06	4.51E-06	8.71E-06	1.08E-05	1.44E-06	6.51E-06	4.06E-06	7.33E-06	5.34E-07	1.77E-06	3.34E-06	1.37E-06
CAGTACTATCTTGA	7.87E-06	9.08E-06	3.85E-05	3.38E-05	1.33E-05	5.13E-07	2.08E-05	2.02E-05	4.93E-06	3.89E-07	4.14E-06	8.72E-06
AACTGGCTTGCTAG	8.38E-06	2.86E-05	4.97E-05	3.55E-05	6.07E-06	1.19E-05	1.38E-05	1.82E-05	1.76E-05	9.72E-06	1.05E-05	1.16E-05
CAGGCAACGACAAT	0.000212985	0.000377333	0.000168118	0.000196757	0.000259511	0.000244146	0.000206558	7.57E-05	0.000218942	0.000261853	0.000147988	0.00015056
GGGAAATCTTTAGT	1.06E-06	5.42E-07	1.93E-05	2.00E-05	1.18E-06	3.92E-07	7.55E-06	2.89E-06	4.57E-07	4.56E-07	5.28E-06	3.85E-06
TGTCAAGGCGCAGG	1.06E-06	1.45E-06	3.91E-05	1.37E-05	4.77E-06	1.03E-06	1.72E-05	1.42E-05	2.49E-07	1.29E-06	7.92E-06	1.32E-05
GATGCCGGATGAAG	8.51E-06	8.95E-06	3.38E-05	1.08E-05	1.03E-06	1.03E-06	1.33E-05	1.78E-05	2.78E-06	1.37E-06	9.33E-06	6.62E-06
CCTGTACACTCAAG	9.10E-05	0.000110143	0.000676553	0.000690905	0.000131598	0.000118536	0.000472313	0.000329359	0.000105995	8.80E-05	0.000383929	0.000405965
AAGGAAATCGAAGA	0.000269102	0.000367021	0.000118807	0.000138797	0.000282356	0.00032051	0.000145769	0.000117776	0.000295342	0.00028037	0.000135669	0.00013859
TTCCCTTAGATTAT	9.50E-06	4.52E-06	8.49E-05	7.84E-05	5.43E-06	6.80E-06	5.35E-05	6.39E-05	4.49E-06	1.05E-05	5.54E-05	7.52E-05
TTCTCCGAGGTCCG	1.06E-06	1.63E-05	0.000464511	0.000392491	1.03E-06	1.03E-06	0.0002762	0.000320506	1.02E-06	9.78E-06	0.000205417	0.000204829
ATTGAAAAGGATTT	6.86E-06	1.02E-05	1.47E-05	2.96E-05	1.08E-05	5.86E-06	4.20E-06	6.57E-06	4.99E-07	3.51E-06	9.06E-07	7.33E-06
TCCGGTCCTTAGCT	4.13E-06	4.62E-06	1.81E-05	1.56E-05	2.46E-06	7.74E-06	5.30E-06	1.96E-05	3.77E-07	3.76E-07	9.01E-06	4.73E-06
TTGTGTCGTCGGGG	0.000772995	0.000694722	5.22E-05	2.89E-05	0.000572405	0.000559911	2.71E-05	4.67E-05	0.000418734	0.000415454	5.55E-05	2.57E-05
AGGAATCGGGAATG	1.06E-06	1.07E-06	1.57E-05	9.81E-06	3.69E-07	3.69E-07	5.00E-06	6.46E-06	4.50E-07	4.49E-07	5.52E-06	4.03E-06
ATAATACGATTGTG	9.63E-06	1.90E-05	2.16E-07	1.57E-05	1.81E-05	7.73E-06	1.32E-05	2.17E-05	3.58E-06	6.43E-06	2.02E-05	1.46E-05
ATGGTGCAGCGGAA	3.55E-06	1.01E-05	1.69E-05	1.99E-05	2.98E-07	2.98E-07	7.64E-06	7.11E-06	3.32E-06	1.43E-06	4.63E-06	8.02E-06
GGGTCGGGATGGGG	0.000236293	0.000424631	1.09E-06	1.10E-06	0.000235556	0.000161275	1.04E-06	1.04E-06	0.000108379	0.000121836	1.04E-06	1.04E-06
GAGTATATTCCAGG	3.96E-05	5.32E-05	4.61E-05	4.59E-05	2.70E-05	3.92E-05	2.90E-05	2.30E-05	1.80E-05	1.62E-05	1.04E-05	9.74E-06
CTTTAATTTCCAGC	0.000351037	0.000310554	0.000163759	0.000250135	0.000149095	0.000144556	0.000158697	0.000160058	7.80E-05	8.25E-05	9.11E-05	7.69E-05
GTCCAGTTGGGCAT	0.0003969	0.000411132	1.03E-05	1.59E-05	0.000285694	0.000301739	1.26E-05	1.26E-05	0.000153078	0.00016227	1.40E-05	1.99E-05
GGGTTAATGGTCAT	0.000682526	0.000631159	0.000757409	0.000584583	0.000326115	0.000353772	0.000342261	0.000487776	0.000233577	0.000235426	0.000221659	0.000189531
GCCTTGCGGCAGGC	3.32E-05	2.17E-05	3.95E-05	4.66E-05	1.05E-05	1.37E-05	1.56E-05	3.33E-05	8.92E-06	2.89E-06	1.66E-05	7.22E-06
CACGTGGATTGAAG	0.000302686	0.000298476	0.002247101	0.001779229	0.00028961	0.000232501	0.001574184	0.001678932	0.000499339	0.000387802	0.001149342	0.001175369
GTATCCCTATTAGG	1.17E-05	9.31E-06	6.27E-05	3.75E-05	1.17E-05	1.18E-05	1.79E-05	1.46E-05	4.78E-06	2.98E-06	6.88E-06	4.99E-06
GCAGTGTCGGCTGT	0.000257938	0.000290609	0.000590388	0.000963888	0.000250789	0.000265948	0.00092285	0.000730991	0.000304707	0.00027457	0.000941668	0.001015697
TTGCGGTAGGGATT	8.09E-06	6.85E-06	7.32E-05	4.50E-05	1.33E-06	1.80E-06	2.90E-05	1.35E-05	1.34E-06	1.57E-06	1.87E-05	1.51E-05
CTGACATTGGGAGT	0.000129355	0.000115724	1.09E-06	1.10E-06	0.000100532	0.000101075	3.61E-06	1.19E-05	4.66E-05	2.51E-05	3.75E-07	4.33E-06
AAGATGCGACGGTA	0.000954248	0.00088164	0.006589103	0.007217312	0.000973493	0.000857301	0.008633466	0.009780405	0.001130316	0.00154593	0.007202594	0.007370036
GGGGCTAGGTTGGG	0.000198375	0.000910968	0.000473488	0.001598512	0.000761828	0.000536845	0.001879471	0.000357	0.000496094	0.000643101	0.001603663	0.001770911
GGAAAACTTATAAA	0.00031039	0.00030978	0.000220738	0.000230018	0.000305571	0.000204245	0.000213112	0.000217986	0.000119784	0.000170148	0.000240635	0.000180109
CCATCCTCCTGCAG	7.04E-06	3.06E-06	2.77E-06	6.17E-06	1.92E-06	3.23E-06	1.20E-06	5.43E-06	2.88E-06	2.66E-06	3.51E-07	3.52E-07
CCGGAGGGGCGTTT	1.05E-06	3.55E-07	1.62E-05	2.54E-05	2.73E-06	1.69E-06	8.61E-06	8.67E-06	5.50E-07	5.49E-07	2.39E-06	1.39E-06
TTCCAAATAACACG	1.09E-05	9.42E-06	3.56E-06	1.85E-06	5.16E-06	3.91E-06	3.05E-07	3.07E-07	5.11E-06	1.84E-06	2.07E-06	3.32E-07
ATGAGGAGTGGTTA	7.55E-06	1.84E-06	0.000126858	0.000120978	1.03E-06	1.03E-06	8.36E-05	8.64E-05	2.38E-08	3.21E-06	4.46E-05	4.65E-05
TCGAGCCGGGGCGG	1.65E-07	2.17E-06	3.11E-06	1.31E-05	4.59E-07	4.59E-07	5.77E-06	1.60E-06	5.32E-07	5.31E-07	1.31E-06	3.50E-06
GAAAGCGGGCTATG	0.002208114	0.002335837	0.000125521	0.000105046	0.001755623	0.001576702	0.000146572	0.000145259	0.001194883	0.00123137	0.000159463	0.00020397
GAGTGTTTCGGTTG	1.06E-06	7.63E-07	6.17E-05	5.15E-05	1.03E-06	1.03E-06	3.89E-05	3.62E-05	1.02E-06	4.79E-07	1.82E-05	2.21E-05
GTACAACTGTGGGG	4.60E-05	2.91E-05	2.88E-05	2.60E-06	1.39E-05	1.72E-05	1.06E-05	9.18E-09	9.91E-06	3.35E-06	2.47E-07	3.87E-06
CAAAGTTTGACCAC	0.000126005	0.000122299	6.15E-05	9.78E-05	4.29E-05	4.87E-05	6.36E-05	5.28E-05	2.70E-05	2.67E-05	4.12E-05	3.37E-05
GATTGCCTGGCATG	1.72E-06	1.07E-06	1.10E-05	2.45E-05	1.48E-06	4.67E-06	3.33E-05	2.16E-06	2.98E-06	1.10E-06	2.95E-06	1.53E-06
GGCTGAGTGGGTAT	0.000359994	0.000402121	1.95E-05	2.89E-07	0.000186244	0.000154128	1.04E-06	5.51E-06	6.05E-05	3.93E-05	2.65E-06	4.83E-06
AATGGGCCCTGGTG	0.019813195	0.01752307	0.00450234	0.002862222	0.018633582	0.019448416	0.00389118	0.004815894	0.021559981	0.020120376	0.00598416	0.005770964
TGATAAATCCTCAT	2.74E-06	1.20E-06	3.83E-05	3.99E-05	1.51E-06	4.66E-07	2.46E-05	1.39E-05	1.01E-06	4.59E-06	1.30E-05	2.14E-05
TGGTTAGTCGTAGA	0.018563503	0.016977668	0.002547582	0.00254275	0.017416721	0.0176048	0.003599083	0.004183043	0.020554016	0.020265774	0.005500993	0.005294391
CTACTTTAAGATAG	1.06E-06	1.07E-06	5.35E-05	4.09E-05	3.50E-06	2.74E-07	2.74E-05	1.48E-05	1.14E-07	9.54E-07	1.29E-05	1.60E-05
GCTGCCCGTTGCCA	5.13E-05	5.58E-05	6.48E-06	5.33E-06	1.80E-05	1.90E-05	5.80E-06	5.65E-06	1.31E-05	1.02E-05	5.11E-06	1.27E-06
GGGGGAGGTTCGGC	4.06E-07	1.58E-05	1.27E-05	8.63E-05	5.11E-06	1.03E-06	0.000162546	1.67E-05	1.02E-06	4.14E-06	9.06E-05	0.000137033
AGTAATTTGAACCA	1.24E-07	1.37E-07	1.00E-05	7.54E-06	2.92E-07	2.93E-07	7.56E-06	7.43E-06	5.25E-07	5.23E-07	2.27E-06	2.97E-06
ACAGGACGGACTGG	1.71E-06	1.07E-06	2.91E-05	1.43E-05	2.80E-07	2.81E-07	1.04E-05	5.16E-06	5.12E-07	5.11E-07	3.72E-06	2.27E-06
TTACTAGGACTGCT	8.60E-06	3.75E-06	0.00016474	0.000124812	3.98E-06	1.03E-06	8.54E-05	0.000119959	3.36E-06	7.42E-06	3.87E-05	5.47E-05
ATCTCCTGATCTAT	4.60E-05	3.34E-05	0.001890403	0.001088784	9.36E-06	1.03E-06	0.001379079	0.001425708	9.45E-05	9.05E-05	0.001129511	0.001128223
TCTTAATAGTCATG	2.94E-05	3.87E-05	1.09E-06	4.91E-06	3.14E-05	2.49E-05	1.04E-06	3.46E-06	3.36E-06	5.88E-06	3.02E-07	9.33E-07
TCTTTTGTTGACTG	1.20E-05	1.11E-05	7.76E-07	1.10E-06	3.45E-06	5.85E-06	1.15E-06	3.04E-07	5.56E-07	5.54E-07	1.19E-06	2.27E-06
GCATCCAGCCTCCT	0.000511657	0.000454646	0.000612086	0.000444062	0.000449487	0.000487952	0.000470655	0.000495282	0.000495265	0.000538593	0.000429391	0.000431769
ATTGACCTGTCCAG	3.53E-05	2.68E-05	0.00115817	0.001028967	2.18E-05	1.62E-05	0.000879809	0.00071149	3.41E-05	3.44E-05	0.000565881	0.000638698
TGACTCATCGTTTA	0.007537506	0.009863156	0.002649216	0.002984548	0.011335259	0.009855444	0.005096505	0.004202828	0.011525647	0.011886726	0.007333934	0.007258064
GGGGCGGGTAAAGG	1.06E-06	7.52E-06	1.65E-05	3.51E-05	3.58E-07	4.92E-07	1.82E-05	4.18E-06	2.90E-07	2.88E-07	1.03E-05	8.43E-06
TTGAATACTTGAGT	1.16E-05	1.41E-05	1.09E-06	1.28E-05	7.08E-06	9.30E-06	7.17E-07	2.37E-06	6.07E-06	4.87E-06	2.14E-06	3.82E-07
ATCTTGGGTGTCAC	0.000103142	6.07E-05	0.000516563	0.000626611	3.28E-05	3.09E-05	0.000444345	0.000474547	3.74E-05	1.99E-05	0.000188477	0.000158418
GAACATACCTTAAC	9.19E-06	3.59E-06	6.79E-05	7.55E-05	4.62E-06	2.17E-06	5.97E-05	6.04E-05	2.53E-05	7.00E-06	5.64E-05	5.16E-05
CAGATAACGAACCG	4.60E-05	2.62E-05	0.000563093	0.000442607	2.43E-05	3.55E-05	0.000623972	0.000542767	8.37E-05	9.53E-05	0.000459042	0.000541132
GGCTATCACTAGCC	1.89E-06	9.62E-06	1.73E-05	3.48E-05	1.75E-07	1.19E-06	7.71E-06	1.26E-05	2.71E-06	1.47E-06	6.20E-06	4.34E-06
TATTATAGACTACA	0.000570078	0.000562211	6.76E-05	6.73E-05	0.000479013	0.000529158	4.13E-05	4.58E-05	0.000320307	0.000368218	0.00010315	9.40E-05
CAGGCGGAACAGCC	1.06E-06	1.90E-05	1.78E-05	0.000114361	2.04E-06	1.03E-06	0.000114443	3.14E-06	1.57E-07	8.36E-07	1.40E-05	5.10E-05
ATAGGCACTAAGTT	2.64E-06	1.07E-06	3.18E-05	4.95E-05	1.03E-06	1.03E-06	2.76E-05	3.56E-05	4.16E-07	4.14E-07	4.32E-06	7.19E-06
TAAAGAATACCGCT	0.001613295	0.001645477	0.000667168	0.000489849	0.00166473	0.001698029	0.00048231	0.000509326	0.001230563	0.001243549	0.000694068	0.000616542
ATTAGGCCGCCAAT	5.09E-05	4.22E-05	2.37E-05	1.67E-05	1.65E-05	1.29E-05	1.64E-05	4.45E-06	7.92E-06	6.01E-06	8.96E-07	6.14E-06
AAATGCAAATGATT	1.64E-05	1.46E-05	3.05E-06	1.48E-06	2.19E-06	2.11E-06	2.58E-06	3.69E-07	1.24E-06	1.64E-06	2.49E-06	3.86E-07
TGAATTACGTGGGT	7.52E-05	5.52E-05	1.09E-06	1.35E-05	4.51E-05	3.51E-05	7.69E-06	1.03E-05	6.90E-06	2.23E-05	1.02E-05	8.75E-06
GGGGGGCGCCGGGG	1.37E-05	0.000185563	1.09E-06	1.10E-06	5.87E-05	4.06E-05	1.04E-06	1.04E-06	4.53E-05	7.68E-05	1.04E-06	0.000617332
ATATCTTAGATATC	1.56E-05	1.47E-05	3.80E-05	7.56E-05	3.13E-06	8.72E-07	4.34E-05	4.13E-05	6.34E-06	1.08E-05	4.54E-05	4.35E-05
TGTGCTATATTGCA	5.57E-06	6.24E-07	9.07E-06	1.67E-05	1.78E-06	2.33E-07	8.98E-06	8.70E-06	4.13E-07	4.11E-07	6.61E-06	5.08E-06
CAGCGGGCGGGGCG	1.06E-06	9.22E-05	0.00019555	0.000685584	2.84E-05	3.36E-06	0.000734918	7.81E-05	2.63E-05	3.84E-05	0.000401241	0.000492568
CCTCATCAGGACAC	7.28E-05	0.000101001	5.95E-05	0.000122531	6.49E-05	8.07E-05	4.33E-05	5.21E-05	2.46E-05	1.69E-05	2.76E-05	3.20E-05
TCTGTCAGGGTGTA	0.000211459	0.000210236	2.23E-05	5.42E-05	0.000131387	0.000137481	2.61E-05	1.84E-05	9.33E-05	0.000112008	2.35E-05	2.35E-05
GTGGGGGCGCGGGG	0.000171401	0.000697401	0.000129146	1.10E-06	0.000356516	0.000263348	0.000142044	1.04E-06	0.000229352	0.000302986	9.22E-05	0.000115803
TCTACTATTTAAGC	2.20E-05	3.16E-05	6.96E-06	1.10E-06	1.25E-05	1.45E-05	2.70E-06	6.68E-08	5.58E-06	1.03E-05	1.96E-06	1.02E-06
TTATATCTGTTAGT	1.65E-05	1.96E-05	0.000141876	0.000137671	1.85E-05	1.46E-05	6.45E-05	5.68E-05	6.72E-06	1.25E-06	1.57E-05	1.43E-05
AATATCTTACGGTT	6.15E-05	3.61E-05	7.29E-05	7.43E-05	1.57E-05	1.72E-05	5.31E-05	2.83E-05	9.95E-06	1.62E-05	4.22E-05	5.15E-05
GTACTATACAAATC	0.000191887	0.000192741	2.63E-05	5.69E-05	0.000123666	0.000122487	3.12E-05	3.13E-05	8.04E-05	7.23E-05	9.64E-06	3.23E-05
TTGGGTGCCGGCGG	1.06E-06	2.02E-06	1.06E-05	2.43E-05	2.30E-06	1.03E-06	2.37E-05	8.69E-06	1.02E-06	2.80E-06	1.69E-05	1.67E-05
TCAGGCCCGGGGTG	0.000211545	0.000176466	0.000135451	8.99E-05	0.000103094	0.000123024	6.65E-05	0.000106649	7.25E-05	7.38E-05	7.22E-05	5.97E-05
GGCGACCAAGGGGT	0.000111234	9.22E-05	3.85E-06	1.10E-06	5.40E-05	7.16E-05	3.26E-06	5.45E-06	1.44E-05	1.66E-05	2.96E-06	9.95E-07
TCCCGTATCAGGCC	0.000151791	0.000152542	0.000451452	0.000696606	0.000127833	0.000117259	0.000538129	0.000461728	0.000113384	0.000104619	0.000433661	0.000440079
GAAGGACGGGGTTG	5.76E-05	3.54E-05	6.83E-05	6.73E-05	2.67E-05	2.47E-05	1.78E-05	2.39E-05	1.09E-05	1.36E-05	8.82E-06	9.68E-08
GTTTTTATAATCCC	1.47E-05	8.20E-06	0.000136665	0.000160401	1.79E-06	4.52E-06	0.000141767	0.000155149	1.21E-05	2.54E-05	0.00011247	9.07E-05
ACCCAACTAGTATA	0.000145564	0.000116727	0.000707892	0.000984777	6.40E-05	6.67E-05	0.000781558	0.000683783	0.000103692	8.66E-05	0.000603899	0.00056834
TTCCGGTTTAGTCG	6.99E-06	1.28E-06	0.000160099	9.81E-05	3.23E-07	1.12E-07	7.01E-05	7.44E-05	6.22E-06	8.99E-06	4.66E-05	4.90E-05
AAACCTTACCTGCG	8.55E-05	5.90E-05	0.001028204	0.001066314	1.49E-05	1.15E-05	0.001058335	0.001096915	8.03E-05	6.78E-05	0.000918176	0.000886222
TGGGGTTAGAAGGG	0.01318675	0.01181706	0.005363808	0.003869614	0.016480419	0.016027724	0.006470359	0.006795576	0.018493745	0.019287024	0.007964076	0.009231973
GCCATTTGCTCACC	2.84E-05	2.97E-05	8.74E-06	1.16E-05	8.91E-06	5.00E-07	3.45E-06	1.81E-06	1.69E-06	5.07E-06	4.36E-06	3.34E-07
CAAGGTGTTAGGTT	0.001651165	0.001491703	0.000943933	0.001037779	0.001308233	0.001417351	0.001075621	0.001258103	0.001225844	0.001251413	0.000982798	0.001015402
TCCGTGACTCCGTC	0.000636886	0.000679665	0.000336174	0.000434009	0.000454944	0.000471804	0.000397228	0.000504526	0.000371931	0.000396514	0.000369768	0.00031102
TGCAGCGGGCGAGT	1.06E-06	1.07E-06	4.41E-05	3.13E-05	3.66E-06	2.16E-06	1.83E-05	4.23E-05	1.18E-06	8.58E-06	6.49E-06	8.83E-06
GGGGGCTGGCAACA	6.09E-05	0.000535623	1.09E-06	7.65E-06	0.000229098	0.000138593	1.23E-05	1.04E-06	8.95E-05	0.000148443	1.13E-05	2.11E-05
GAATCACAAGATCG	3.84E-05	3.63E-05	7.18E-05	0.000207581	1.44E-05	1.26E-05	0.000146082	0.000159401	4.55E-06	1.59E-05	6.67E-05	8.78E-05
ATTAGCTGACGGTG	4.24E-05	5.06E-05	0.000182901	7.31E-05	8.53E-06	3.93E-06	6.65E-05	0.000102692	1.54E-05	1.86E-05	3.28E-05	3.47E-05
TCATAATTCGATTC	8.24E-05	5.22E-05	1.28E-05	2.48E-05	3.87E-05	3.52E-05	1.13E-05	9.37E-06	1.27E-05	1.65E-05	1.18E-06	6.65E-06
CACTTCATTGATGC	3.91E-05	1.84E-05	0.000100582	0.000189447	1.03E-06	3.51E-06	0.000132279	0.000171056	1.02E-06	1.11E-05	0.000125136	8.81E-05
GGTCTATGAGCACG	1.01E-05	1.61E-05	1.09E-06	2.27E-06	7.89E-06	9.14E-06	1.99E-07	2.02E-07	6.75E-06	4.39E-06	2.77E-07	2.78E-07
CTGTAGTGCCCGGC	0.000179289	0.000237675	9.57E-05	0.000152557	0.000152521	0.000131551	0.000143556	9.19E-05	0.000118223	0.000146895	8.61E-05	6.40E-05
CATTCTGCCACTGC	0.000169436	0.000177841	6.47E-05	0.000109093	0.000155448	0.000160568	8.06E-05	5.89E-05	0.000177739	0.000168496	6.70E-05	8.54E-05
CGTTCGGGGGTGGT	2.13E-05	8.38E-06	0.000195805	0.000126784	1.26E-05	8.08E-07	8.13E-05	0.000120791	1.84E-06	1.02E-06	5.69E-05	8.75E-05
GGGGTGGGGATGCC	5.26E-07	7.79E-06	5.84E-07	3.85E-06	3.77E-06	1.55E-06	3.50E-06	3.55E-07	1.36E-06	2.90E-06	3.67E-06	1.17E-06
TCTATGTGGAGGGG	1.06E-06	1.07E-06	0.000380427	0.000290312	1.03E-06	1.03E-06	0.000164046	0.0002373	1.02E-06	1.02E-06	0.000122193	0.000108669
CTTCGTAAAGCTGT	0.000117892	0.00013807	7.86E-05	5.21E-05	9.94E-05	7.64E-05	4.48E-05	4.07E-05	5.30E-05	3.26E-05	4.30E-05	3.75E-05
ATAGGTTCGCTTTT	1.66E-05	1.29E-05	0.00027708	0.000277085	5.49E-06	9.88E-06	0.000173352	0.00018219	1.59E-05	7.70E-06	0.000107105	0.000119174
CAGAAATATGCCGC	1.37E-05	2.06E-05	1.21E-05	1.84E-05	3.92E-06	1.44E-05	1.07E-05	2.05E-05	5.54E-06	1.00E-06	3.40E-06	2.20E-06
AGACAGCATGGCTC	4.19E-06	3.53E-05	3.80E-05	7.49E-05	4.92E-06	8.01E-06	4.60E-05	2.12E-05	1.67E-05	9.67E-06	2.48E-05	4.27E-05
TACTGTTGGGCAGT	5.59E-05	3.58E-05	5.44E-05	6.87E-05	2.16E-05	1.69E-05	4.77E-05	3.41E-05	1.68E-05	2.02E-05	1.33E-05	2.27E-05
GATTCGTGGTTACG	7.39E-05	7.94E-05	1.85E-06	0.000184458	8.66E-05	6.08E-05	0.000127826	0.00013678	5.90E-05	6.17E-05	0.000138924	0.00010522
TCGAGGGGGCGGGA	0.000810905	0.000758767	0.000685595	0.000793035	0.000677648	0.000631067	0.000929172	0.001162466	0.000812014	0.000768107	0.000819621	0.000835716
TCTAATTGGTCCTG	1.06E-06	1.07E-06	2.20E-05	9.14E-06	4.07E-07	1.31E-06	4.57E-06	5.15E-06	5.40E-07	5.38E-07	2.99E-06	1.39E-06
CGGTGTCAACTCGA	0.000169075	0.000264628	0.00037759	0.000426083	0.000190638	0.000190836	0.000289319	0.000214793	0.000200733	0.000154248	0.000249868	0.000219149
ACAAATAAGTGCAT	0.000242065	0.000217986	4.94E-05	3.83E-05	0.000167641	0.000169889	1.75E-05	2.43E-05	0.000109423	0.000103242	1.84E-05	2.79E-05
TGTGGGCCAACGAC	0.000118062	0.000105499	0.000371916	0.000475582	6.90E-05	5.46E-05	0.000418186	0.000507094	5.03E-05	4.64E-05	0.000266249	0.000277222
GGTATGTTATGGTC	0.000168333	0.000136271	9.97E-05	0.000148657	0.000107952	8.23E-05	9.82E-05	8.19E-05	4.89E-05	5.77E-05	4.13E-05	5.31E-05
GTTTTCTAATTTTT	3.35E-05	3.79E-05	1.09E-06	1.10E-06	1.28E-05	4.73E-06	2.57E-06	1.93E-07	1.43E-06	1.02E-05	2.70E-07	3.73E-07
CTCGTTAATTTTCG	1.06E-06	1.07E-06	5.86E-06	0.00012544	1.03E-06	1.03E-06	0.000219995	5.88E-07	2.12E-07	1.02E-06	1.02E-05	1.30E-05
TGGCGAATTACGCG	6.35E-06	1.06E-06	9.35E-05	8.74E-05	3.30E-06	1.83E-06	6.61E-05	4.97E-05	7.89E-06	2.53E-06	2.55E-05	3.92E-05
ATTGGATCGGGTGT	0.000344582	0.000258721	0.001452549	0.001224089	0.00019465	0.000214013	0.000958639	0.001177965	0.000298837	0.000304943	0.000697429	0.000689578
GCAGGGCGAGACGG	0.000666395	0.00084108	3.52E-05	7.82E-06	0.000644087	0.000616495	2.41E-05	2.21E-05	0.000357385	0.000361787	1.32E-05	1.46E-05
TACCGGCTACATGG	2.40E-07	1.38E-06	1.60E-05	2.14E-05	2.68E-07	2.69E-07	6.71E-06	9.37E-06	4.09E-07	4.08E-07	2.75E-06	9.13E-06
GCCAGTCGACCATA	0.001888284	0.002143629	0.000453884	0.000587853	0.001873457	0.001736543	0.000759436	0.000773475	0.002412106	0.002434456	0.001289805	0.001291074
TTTCTCAGTTAGAT	1.06E-06	4.15E-06	2.96E-05	3.67E-05	1.03E-06	1.03E-06	2.08E-05	2.10E-05	2.77E-07	1.16E-06	8.76E-06	1.07E-05
CGTGGGTGGAGGTA	3.32E-05	1.07E-06	1.53E-05	1.10E-05	1.09E-05	2.95E-07	3.08E-06	1.15E-05	2.37E-06	5.73E-07	1.16E-06	1.19E-06
ATGGGAGACGTGTG	0.000217146	0.00021397	5.48E-05	5.85E-05	0.000188041	0.000148725	6.23E-05	7.96E-05	0.000158624	0.000147695	7.58E-05	7.47E-05
AAGGTCTATTCAAT	0.001117793	0.001401342	3.60E-05	3.68E-05	0.00087695	0.000869166	1.04E-06	2.40E-05	0.00037573	0.000345796	1.22E-05	1.65E-05
CAACTACGAGGGAA	0.001090521	0.001010825	0.000543224	0.000654989	0.000825724	0.000780304	0.000544346	0.0005048	0.000772475	0.000742518	0.000537231	0.000467203
CGGCGGGATGGTTG	1.06E-06	2.68E-06	1.14E-05	5.93E-05	3.30E-06	9.03E-07	3.56E-05	2.84E-06	2.68E-07	4.00E-07	5.52E-06	6.84E-06
GTTTTATGTTTGGG	0.000198867	0.000156726	1.74E-05	3.60E-06	0.000143137	0.000117885	1.23E-05	1.59E-05	9.61E-05	9.75E-05	1.91E-05	1.36E-05
ATACAATTGTAACA	1.92E-05	2.07E-05	7.49E-07	3.34E-06	1.08E-05	1.22E-05	1.48E-06	1.22E-07	1.38E-05	3.25E-06	4.71E-06	1.98E-07
TAGTCGCTTTCCAC	0.000398338	0.000341446	0.000139254	0.000235074	0.000324436	0.000322677	0.000235295	0.000177321	0.000309367	0.000280431	0.000216795	0.000232236
TTCTTCTTCTACAG	0.00197166	0.001966978	0.000235394	0.000314901	0.001692498	0.001762735	0.000378325	0.000399762	0.001760985	0.001668069	0.000402142	0.00033441
CCGGGCTGTGGGGA	2.41E-05	1.08E-05	1.03E-06	6.21E-06	1.57E-05	1.37E-05	6.30E-07	3.72E-08	1.65E-05	1.41E-06	7.25E-07	1.34E-06
AGGTACAGGCGTTG	0.000860838	0.00085798	0.00038863	0.000280289	0.000630295	0.000673698	0.000216582	0.000239791	0.000407465	0.000332826	0.000134684	0.000170871
ATATCTCATCCACA	5.18E-05	6.46E-05	0.000972171	0.000937286	4.34E-06	1.90E-05	0.00077988	0.000902327	6.26E-05	4.78E-05	0.000672766	0.000708059
GAGGAGCTTTGCAT	0.000539765	0.000578378	0.000128586	8.96E-05	0.000364038	0.000311336	7.68E-05	9.06E-05	0.0002075	0.000197995	4.23E-05	4.58E-05
AGATTTATACTCAA	6.32E-06	1.04E-06	0.000152088	0.000134879	2.11E-07	1.88E-06	7.97E-05	0.000108646	2.79E-06	1.02E-06	6.20E-05	6.43E-05
CAGTGGCAAGGGGG	1.33E-06	6.72E-06	2.18E-06	7.73E-06	4.21E-06	2.16E-06	5.96E-07	3.43E-07	7.64E-07	4.44E-06	3.55E-07	1.86E-06
GGCTGCTCTGTGAG	3.25E-05	3.90E-05	6.02E-07	2.81E-07	1.14E-05	2.00E-05	1.03E-06	5.41E-06	1.04E-05	1.02E-05	1.52E-07	6.07E-07
GTTTATCGACTAGG	5.57E-05	2.84E-05	0.001185036	0.000736878	2.31E-05	3.27E-06	0.00062996	0.000661312	3.38E-05	4.02E-05	0.000457715	0.000418237
GTATATGCCACTGA	0.00054309	0.000311812	0.002637841	0.002470001	0.00027534	0.000226033	0.001691628	0.002012418	0.000243492	0.000244458	0.001118086	0.001046002
ATTTATGGCTAGTT	1.06E-06	6.33E-06	1.32E-05	5.48E-05	2.32E-06	1.03E-06	2.90E-05	2.55E-06	3.55E-07	2.85E-06	7.78E-06	7.16E-06
GGGTAGCCAACTAG	0.000219535	0.000214535	8.00E-05	4.00E-05	6.24E-05	0.000100953	1.89E-05	8.17E-06	3.42E-05	6.32E-05	2.35E-05	1.61E-05
TTACGGTTGGACTG	0.000162665	0.000211839	1.09E-06	1.47E-06	0.000154917	0.000150449	3.08E-06	5.97E-06	9.06E-05	8.52E-05	7.19E-06	4.53E-06
TGGTCCTACCGTAC	0.000313265	0.000345103	0.00014659	0.000218786	0.000223645	0.000226661	0.000172668	0.000197445	0.000157515	9.42E-05	0.000126835	0.000125821
GGCTACCCGGTAAC	1.21E-05	4.93E-07	0.000154203	0.000227436	1.03E-06	7.15E-06	0.000138435	0.000197872	1.04E-05	1.44E-06	7.71E-05	0.000100182
CTCATTGGAGTATT	5.91E-05	6.44E-05	0.000445666	0.000661001	1.94E-05	3.04E-05	0.000405421	0.000306496	4.16E-05	1.85E-05	0.000172077	0.000149424
GCGGGGCGGTCTGG	0.000166065	0.000931746	8.66E-06	3.94E-05	0.000406402	0.000355181	8.34E-06	1.04E-06	0.000160369	0.000199183	1.03E-05	1.07E-05
CGCCACTAAGCTTA	1.06E-06	1.04E-05	0.000390238	0.000338999	8.90E-06	1.78E-05	0.000338008	0.000347613	2.12E-05	1.62E-06	0.000282858	0.000304206
CCCATTTCTTACAT	2.48E-06	1.70E-06	1.98E-05	2.16E-05	1.23E-06	3.44E-07	7.80E-06	4.83E-06	4.84E-07	1.56E-06	2.14E-06	5.42E-06
GAACCTGACGTACG	9.95E-06	1.38E-06	0.000182686	0.000139266	1.03E-06	7.02E-06	6.98E-05	0.000122507	5.11E-06	8.34E-06	4.49E-05	4.08E-05
TTGGATAACCCAAC	2.84E-05	4.11E-05	3.17E-05	6.21E-05	1.81E-05	7.60E-06	1.91E-05	1.68E-05	9.48E-06	1.12E-05	3.82E-06	6.23E-06
