# Supplementary material for: Cancer cells exhibit clonal diversity in phenotypic plasticity
Source: PubMed Central journal article supplement (PMC5356442; doi:10.1098/rsob.160283), 2017-02-15
Supplement: rsob160283supp2.pdf [file rsob160283supp2.pdf]

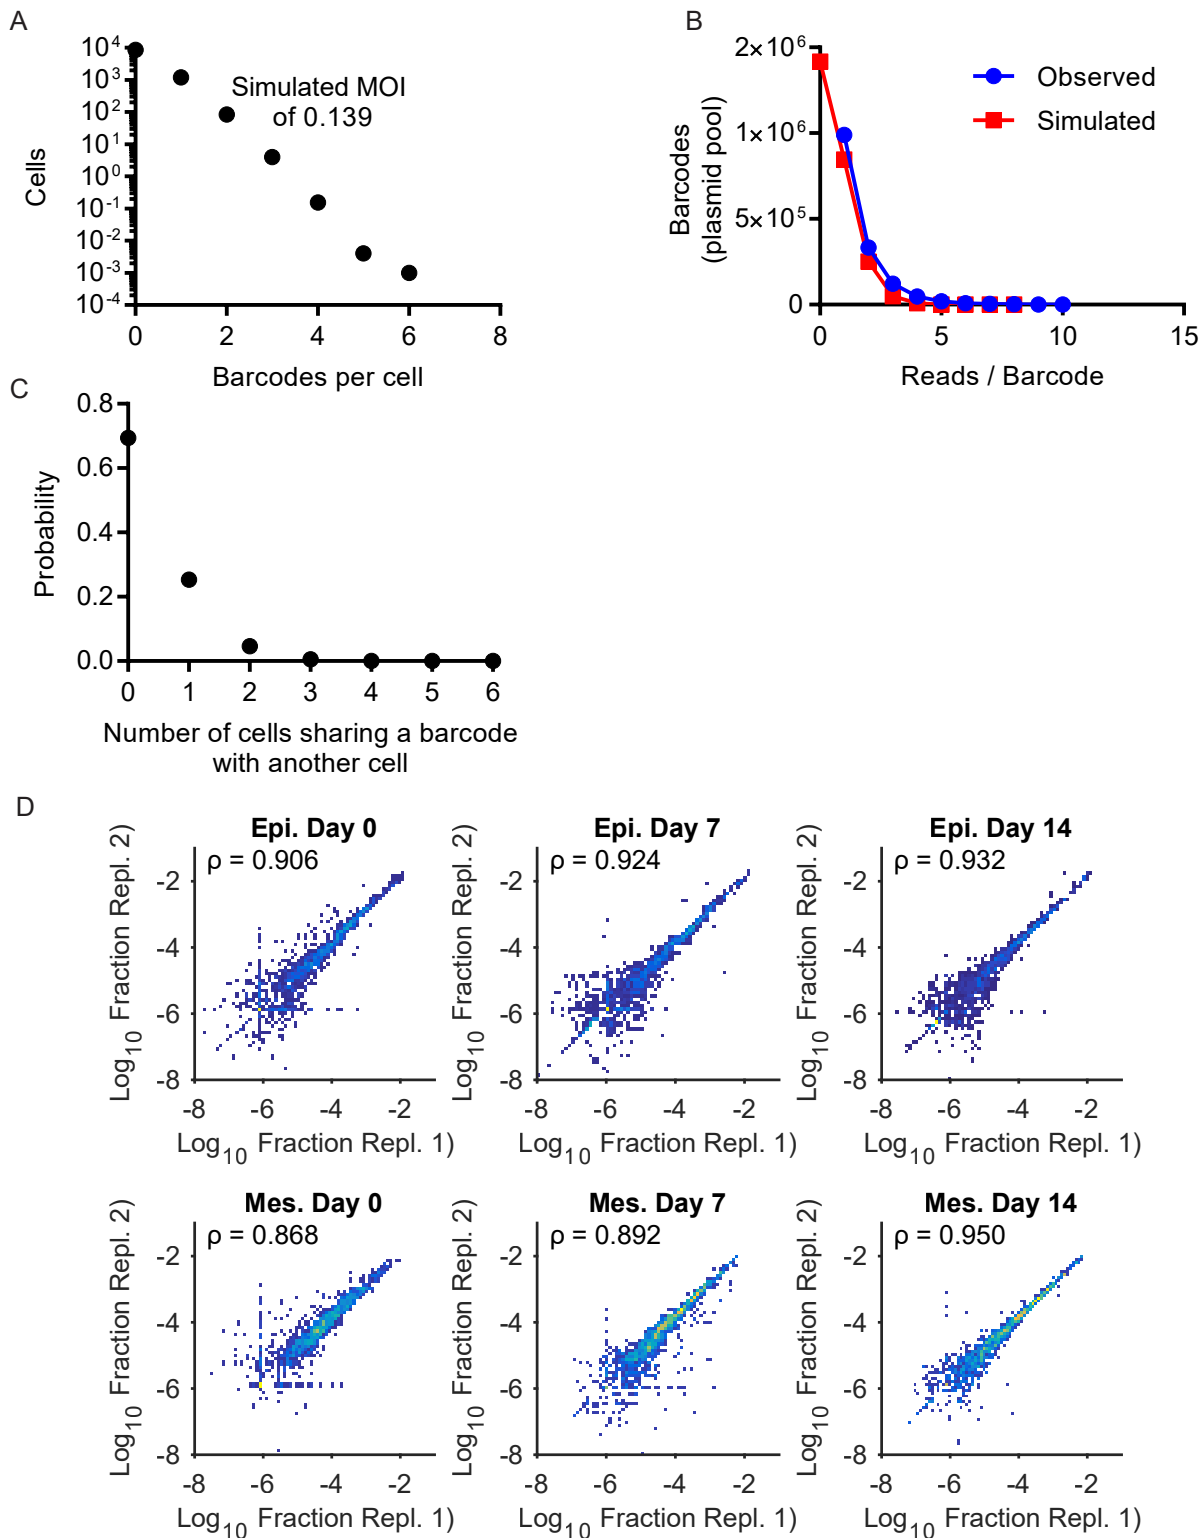

Supplementary Figure 1: Tracking clones with DNA barcodes

**(a)** Simulation of the infection conditions from the calculated MOI using a Poisson distribution suggests very few cells (6.8%) received more than one barcode. **(b)** High-throughput sequencing results of the pool of barcodes, plotted as the number of barcodes observed with each number of reads vs the reads per barcode. Also plotted is the expected number of unique barcodes sequenced assuming equal abundance of barcodes and  $2.6 \times 10^6$  total unique barcodes, the complexity calculated from the observed distribution (see Materials and Methods). **(c)** Plot of the probability (y) of a certain number of infected cells (x) sharing a barcode with another cell (via simulation). **(d)** Technical replicates of barcodes sampled from the same population of labeled cells show good reproducibility. Each barcode's estimated fraction of the total population is plotted in two halves of one population, split before extracting DNA. Barcodes not found in one replicate were given values of  $1 \times 10^{-6}$  (see Materials and Methods). Color indicates the density of points; abbreviations are epithelial cells (Epi.), mesenchymal cells (Mes.), technical replicate (Repl.).

A

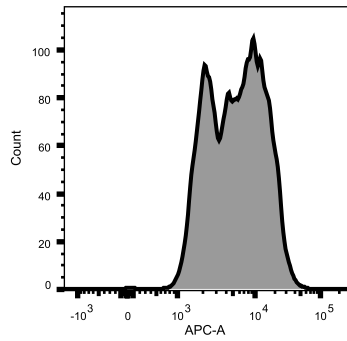

Keratin 8 / Keratin 18 staining

B

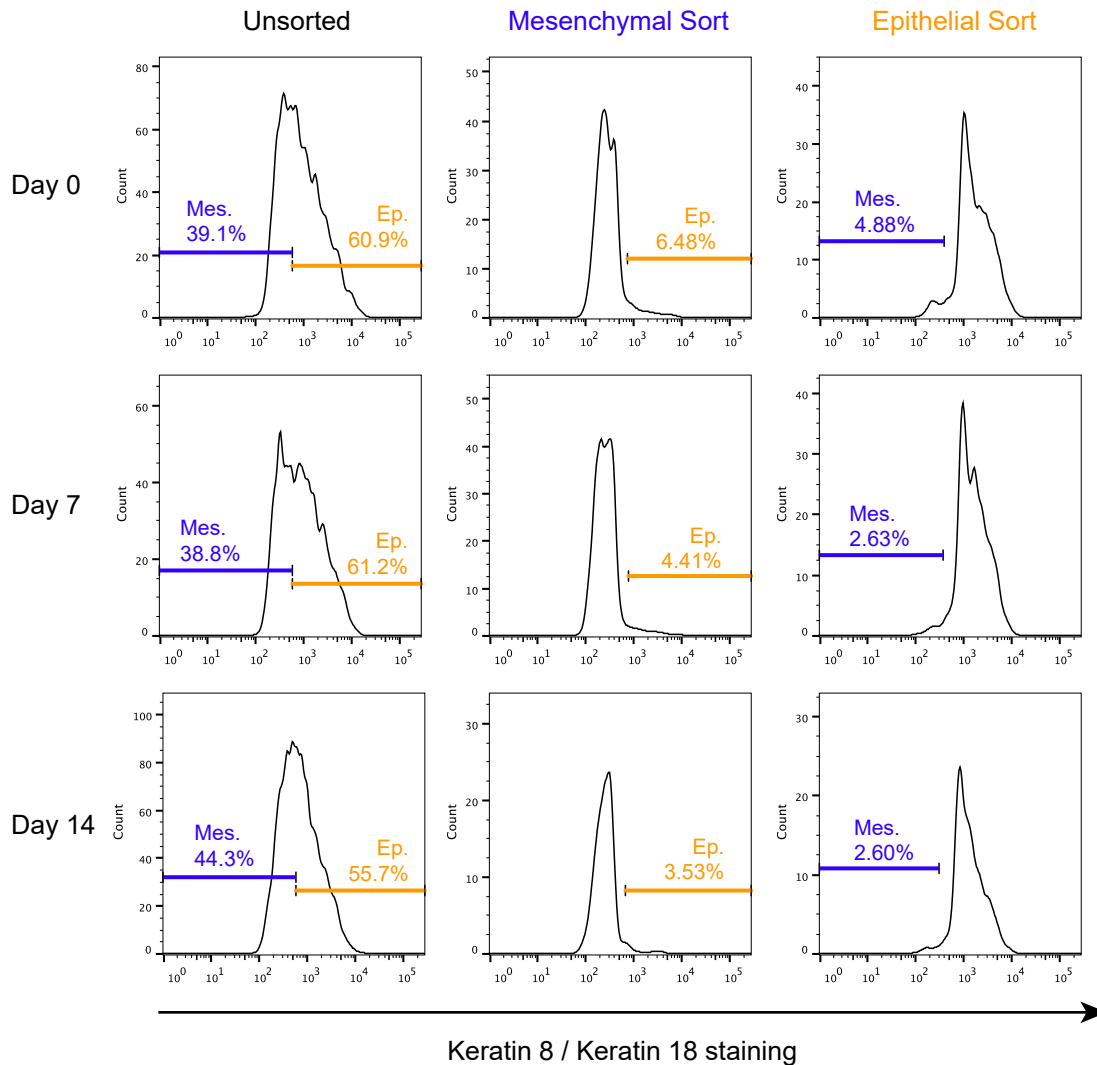

Keratin 8 / Keratin 18 staining

Supplementary Figure 2: Fluorescence activated cell sorting based on keratin expression

(a) Histogram of barcoded MDA-MB-157 cells based on Keratin 8 / Keratin 18 expression as assayed by flow cytometry. (b) Post-sort flow cytometry of sorted populations; cells sorted in error were computationally subtracted from the barcode data. Shown are unsorted cells, and each sorted fraction for each time point: Keratin 8 / Keratin 18 high cells (Epithelial, Ep.) and Keratin 8 / Keratin 18 low cells (Mesenchymal, Mes.).

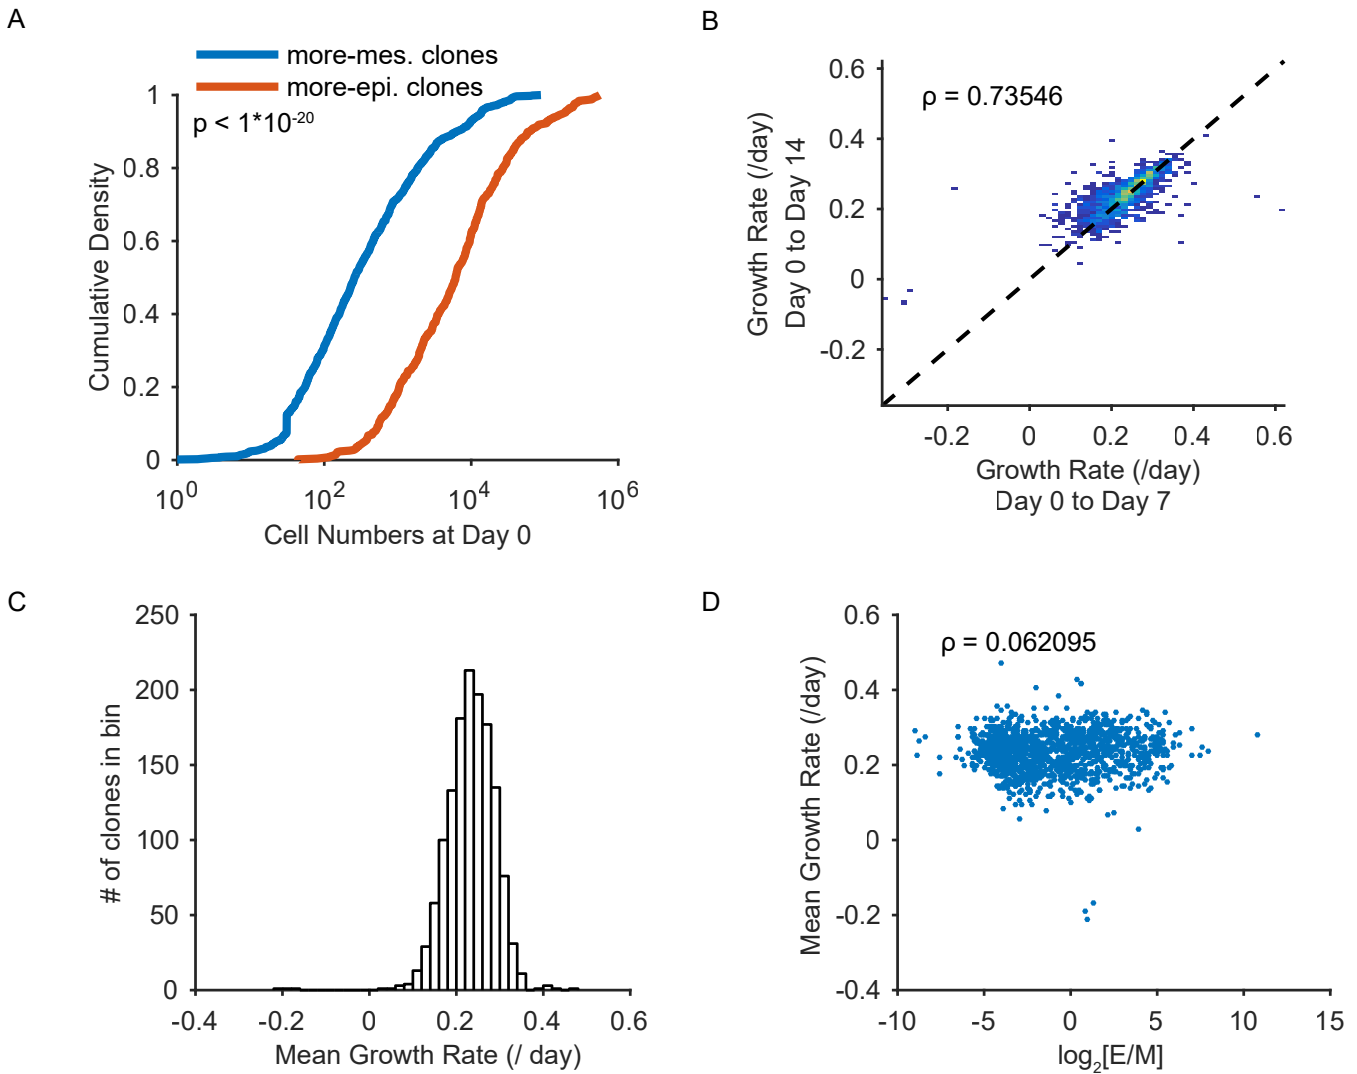

Supplementary Figure 3: Growth rates of clones

**(a)** Estimated cell numbers at day 0 of more-mesenchymal (more-mes.) and more-epithelial (more-epi.) clones. The  $p$  value displayed is from a rank-sum test of these two groups. **(b)** Growth rate ( $k$ , per day) of clones, determined from the change in each clone's cell numbers from day 0 to day 7, or to day 14. Each dot corresponds to a clone; overlapping dots produce a different color. The Pearson correlation ( $\rho$ ) is displayed, and the line  $y=x$  is plotted (dotted line). **(c)** Histogram of the average growth rate of each clone. **(d)** Plot of each clone's average growth rate vs its  $\log_2$ (Epithelial/Mesenchymal) ratio ( $\log_2[E/M]$ ). The Pearson correlation ( $\rho$ ) is displayed.

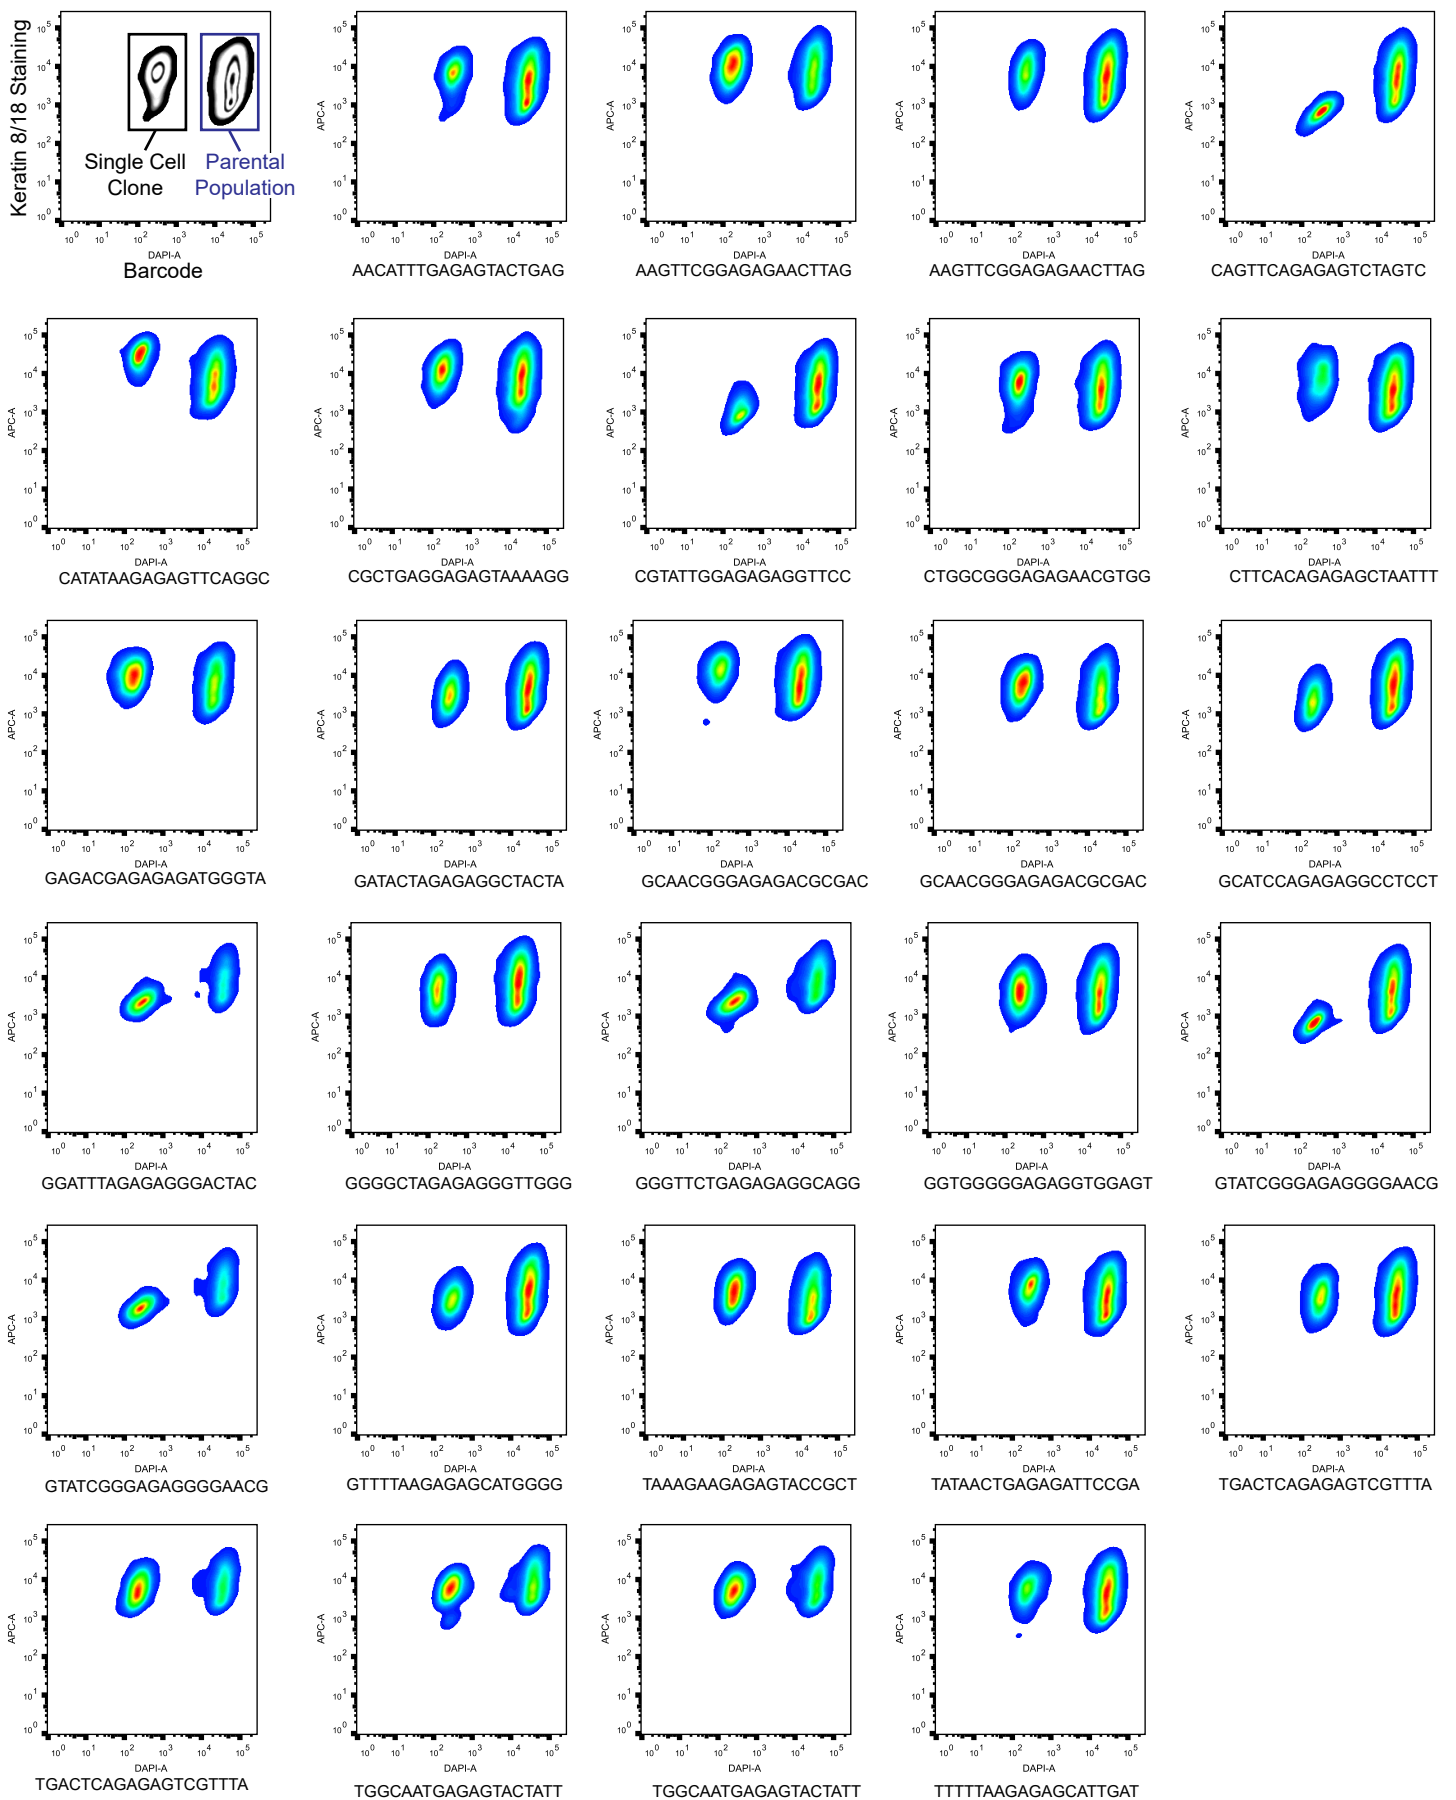

Supplementary Figure 4: Flow cytometry of single cell clones

Flow cytometry of single-cell clones (see Figure 3), with Keratin 8 / Keratin 18 staining on the y axis, and the covalent stain marking the spiked-in polyclonal/parental population on the x axis. The upper-left plot is a key showing the different populations. Each clone's barcode is displayed under each clone.

| Barcode        | Single Cell Clone log <sub>2</sub> [E/M] | Pool log <sub>2</sub> [E/M] |
|----------------|------------------------------------------|-----------------------------|
| AACATTTTACTGAG | 3.345                                    | 0.891                       |
| AAGTTCGAACTTAG | 1.687                                    | 1.934                       |
| AAGTTCGAACTTAG | 1.895                                    | 1.934                       |
| CAGTTCATCTAGTC | -9.522                                   | -3.157                      |
| CATATAATTCAGGC | 6.583                                    | 5.292                       |
| CGCTGAGTAAAAGG | 2.737                                    | 0.817                       |
| CGTATTGAGGTTCC | -5.642                                   | -4.257                      |
| CTGGCGGAACGTGG | 1.932                                    | 1.285                       |
| CTTCACACTAATTT | 2.626                                    | -0.987                      |
| GAGACGAATGGGTA | 3.329                                    | 3.188                       |
| GATACTAGCTACTA | -0.825                                   | -1.357                      |
| GCAACGGACGCGAC | 3.457                                    | 1.310                       |
| GCAACGGACGCGAC | 2.833                                    | 1.310                       |
| GCATCCAGCCTCCT | -2.721                                   | 0.031                       |
| GGATTTAGGACTAC | -8.617                                   | -3.929                      |
| GGGGCTAGGTTGGG | -1.141                                   | -1.084                      |
| GGGTTCTAGGCAGG | -6.932                                   | -4.074                      |
| GGTGGGGGTGGAGT | 0.504                                    | -0.905                      |
| GTATCGGGGAACG  | -9.928                                   | -5.013                      |
| GTATCGGGGAACG  | -9.179                                   | -5.013                      |
| GTTTTAACATGGGG | -1.584                                   | -2.766                      |
| TAAAGAATACCGCT | 2.837                                    | 1.391                       |
| TATAACTATTCCGA | 3.105                                    | 1.432                       |
| TGACTCATCGTTTA | -0.953                                   | 1.166                       |
| TGACTCATCGTTTA | 0.379                                    | 1.166                       |
| TGGCAATTACTATT | -1.599                                   | 1.280                       |
| TGGCAATTACTATT | -0.955                                   | 1.280                       |
| TTTTTAACATTGAT | 1.559                                    | 1.090                       |

Supplementary Table 2: Phenotypic ratio of single cell clones

Supplementary Table 3: Table of primers and oligonucleotide sequences

|                   |                                                                                         |
|-------------------|-----------------------------------------------------------------------------------------|
| ClBc_5_primer_AAG | AATGATACGGCGACCACCGAGTAGACGGAGCGGACAACACTAAGACAGG                                       |
| ClBc_5_primer_CAT | AATGATACGGCGACCACCGAGTAGACGGAGCGGACAACACTCATACAGG                                       |
| ClBc_5_primer_TAG | AATGATACGGCGACCACCGAGTAGACGGAGCGGACAACACTTAGACAGG                                       |
| ClBc_5_primer_CAA | AATGATACGGCGACCACCGAGTAGACGGAGCGGACAACACTCAAAACAGG                                      |
| ClBc_5_primer_TTC | AATGATACGGCGACCACCGAGTAGACGGAGCGGACAACACTTTCCAGG                                        |
| ClBc_5_primer_ATC | AATGATACGGCGACCACCGAGTAGACGGAGCGGACAACACTATCCAGG                                        |
| ClBc_5_primer_GTT | AATGATACGGCGACCACCGAGTAGACGGAGCGGACAACACTGTTACAGG                                       |
| ClBc_5_primer_GTA | AATGATACGGCGACCACCGAGTAGACGGAGCGGACAACACTGTAAACAGG                                      |
| ClBc_3_primer_TCC | CAAGCAGAAGACGGCATAACGAGCTCTTCCGATCTGGCTCTGGATTGTCAGCGTTCCCGTGC                          |
| ClBc_3_primer_TCG | CAAGCAGAAGACGGCATAACGAGCTCTTCCGATCTGGCTCTGGATTGTCAGCGTTCGCGTGC                          |
| ClBc_3_primer_GCT | CAAGCAGAAGACGGCATAACGAGCTCTTCCGATCTGGCTCTGGATTGTCAGCGTGCTCGTGC                          |
| ClBc_3_primer_CCT | CAAGCAGAAGACGGCATAACGAGCTCTTCCGATCTGGCTCTGGATTGTCAGCGTCCCTCGTGC                         |
| ClBc_3_primer_GGA | CAAGCAGAAGACGGCATAACGAGCTCTTCCGATCTGGCTCTGGATTGTCAGCGTGGACGTGC                          |
| ClBc_3_primer_CGA | CAAGCAGAAGACGGCATAACGAGCTCTTCCGATCTGGCTCTGGATTGTCAGCGTCGACGTGC                          |
| ClBc_3_primer_AGC | CAAGCAGAAGACGGCATAACGAGCTCTTCCGATCTGGCTCTGGATTGTCAGCGTAGCCGTGC                          |
| ClBc_3_primer_AGG | CAAGCAGAAGACGGCATAACGAGCTCTTCCGATCTGGCTCTGGATTGTCAGCGTAGGCGTGC                          |
| ClBc_seq_primer   | CCGAGTAGACGGAGCGGACAACACT                                                               |
| ClonalBarcode5    | 5'phos/GATCCTAGACGGAGCGGACAACACTGACACAGGNNNNNNNGAGAGNNNNNNNGCACGTGTACGCTGACAATCCAGAGCCG |
| ClonalBarcode3    | 5'phos/AATTCGGCTCTGGATTGTCAGCGTACACGTGCNNNNNNNCTCTCNNNNNNNCCTGTGTACGTGTTGTCCGCTCCGTCTAG |
| CLBc_A5           | CTCTGCAGAATGGCCAACC                                                                     |
| CLBc_A3           | CTTCTGGAATAGCTCAGAGGCCGAG                                                               |
| CLBc_B5           | GCACCTTTAACCAGACCTCATCAC                                                                |
| CLBc_B3           | GACTTCCACACCTGGTTGC                                                                     |
